# Supplementary material for: The genome sequence of the fish pathogen Aliivibrio salmonicida strain LFI1238 shows extensive evidence of gene decay
Source: PubMed Central journal article supplement (PMC2627896; doi:10.1186/1471-2164-9-616), 2008-12-19

**Additional file 1. A:** Schematic circular diagrams of *A. salmonicida* LFI1238 plasmids; **B:** Putative duplicated regions of the plasmids in comparison to chromosome I.

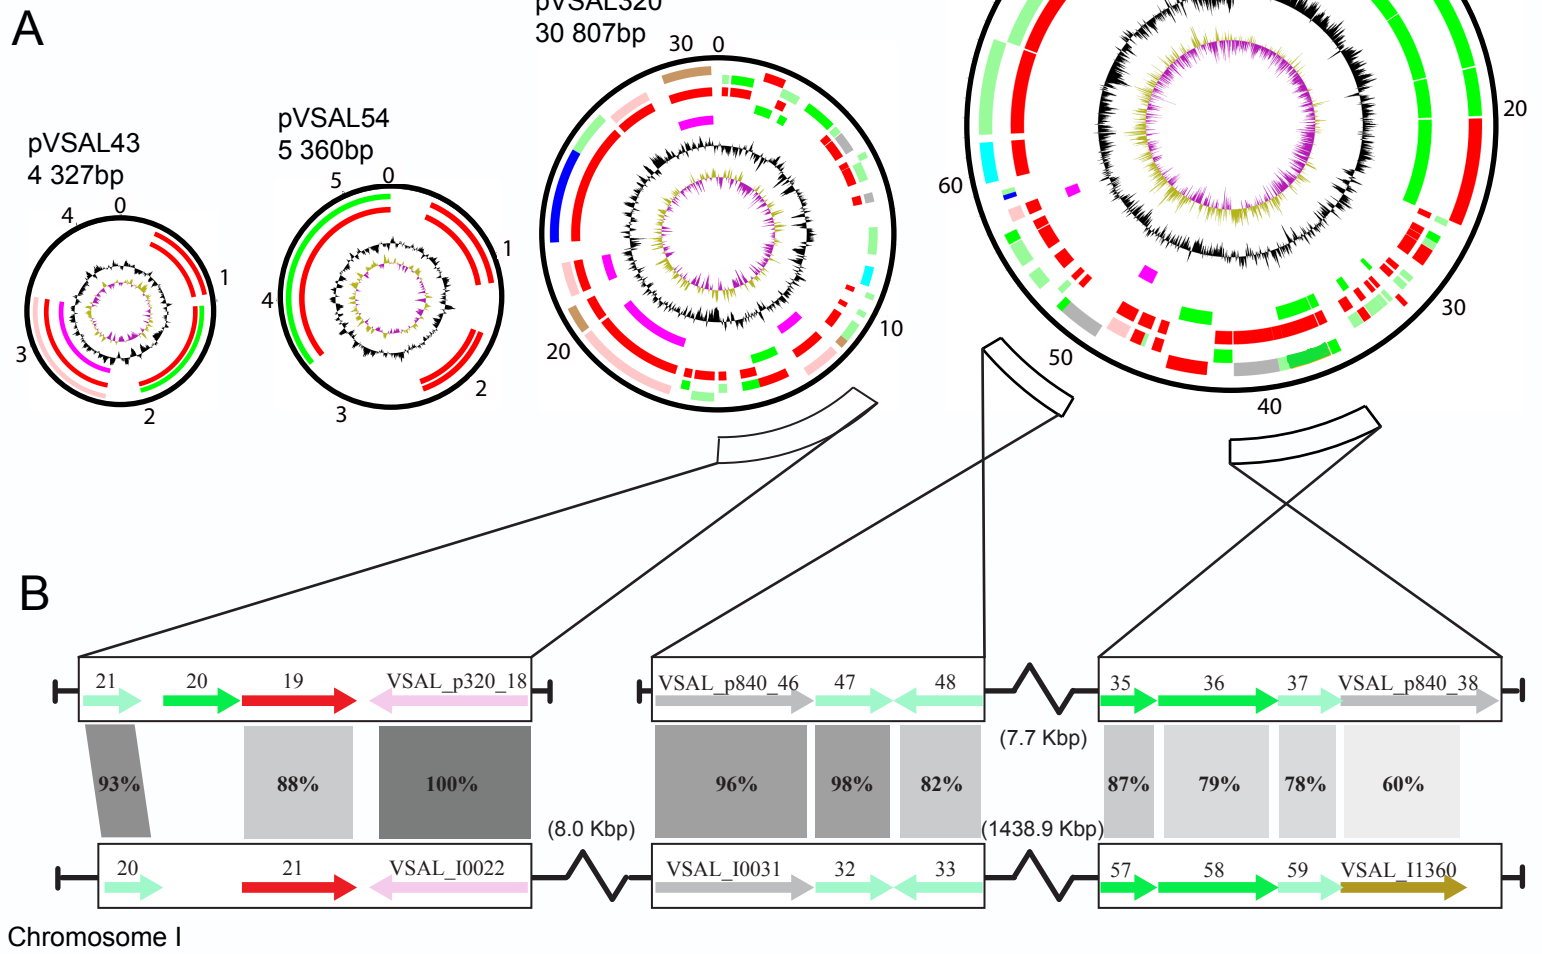

Supplement: 1471-2164-9-616-S1.pdf [file 1471-2164-9-616-S1.pdf]
