# Supplementary material for: The genome sequence of the fish pathogen Aliivibrio salmonicida strain LFI1238 shows extensive evidence of gene decay
Source: PubMed Central journal article supplement (PMC2627896; doi:10.1186/1471-2164-9-616), 2008-12-19
Supplement: 1471-2164-9-616-S2.pdf [file 1471-2164-9-616-S2.pdf]

**Additional file 2.** Types and distribution of IS elements encoded in the *A. salmonicida* genome.

| Type  | IS family* | CDSs | Chromosome I    | Chromosome II  | pVSAL840 | pVSAL320 | pVSAL54 | pVSAL43  | Total copies    | Total ORFs      |
|-------|------------|------|-----------------|----------------|----------|----------|---------|----------|-----------------|-----------------|
| VSa1  | IS4        | 1    | 12 (2)          | 2 (1)          |          |          |         |          | 14 (3)          | 14 (3)          |
| VSa2  | IS4, IS66  | 3    | 74 (10)         | 37 (13)        |          |          |         |          | 111 (23)        | 313 (15)        |
| VSa3  | IS91       | 1    |                 |                | 1        |          |         |          | 1               | 1               |
| VSa4  | IS6        | 1    |                 |                | 1        |          |         |          | 1               | 1               |
| VSa5  | IS4        | 1    | 1               |                |          |          |         |          | 1               | 1               |
| VSa6  | IS982      | 1    | 45 (2)          | 14             |          |          |         |          | 59 (2)          | 59 (2)          |
| VSa7  | IS30       | 1    | 6               | 3              |          |          |         |          | 9               | 9               |
| VSa8  | IS630      | 2    | 17              | 10             |          |          |         |          | 27              | 54              |
| VSa9  | IS91       | 1    | 22 (1)          | 23 (3)         |          | 3        |         | 1        | 49 (4)          | 49 (4)          |
| VSa10 | IS91       | 1    |                 | 2              |          |          |         |          | 2               | 2               |
| VSa11 | IS3        | 2    | 1               | 1              |          |          |         |          | 2               | 4               |
| VSa12 | IS3        | 1    |                 | 1 (1)          |          |          |         |          | 1 (1)           | 1 (1)           |
| VSa13 | ISAs1      | 1    | 1               |                |          |          |         |          | 1               | 1               |
| VSa14 | ISAs1      | 1    | 3               |                |          |          |         |          | 3               | 3               |
| VSa15 | IS5        | 1    | 1               |                |          |          |         |          | 1               | 1               |
| VSa16 | IS630      | 1    | 1               |                |          |          |         |          | 1               | 1               |
| VSa17 | ISNCY      | 1    | 3               |                |          |          |         |          | 3               | 3               |
| VSa18 | IS5        | 2    | 1               |                |          |          |         |          | 1               | 2               |
| VSa19 | IS5        | 1    |                 |                |          | 1        |         |          | 1               | 1               |
| VSa20 | IS5        | 1    | 1 (1)           |                |          |          |         |          | 1 (1)           | 1 (1)           |
|       |            |      | <b>188 (13)</b> | <b>93 (18)</b> | <b>2</b> | <b>4</b> |         | <b>1</b> | <b>288 (33)</b> | <b>521 (26)</b> |

\*Based on similarities to defined families in the IS Finder database (<http://www-is.biotoul.fr/is.html>)

() Disrupted or partial IS elements and transposase genes
