# Supplementary material for: The genome sequence of the fish pathogen Aliivibrio salmonicida strain LFI1238 shows extensive evidence of gene decay
Source: PubMed Central journal article supplement (PMC2627896; doi:10.1186/1471-2164-9-616), 2008-12-19

**Additional file 3.** Codon Adaptation Index (CAI) of genes plotted against Codon Bias Index (CBI).

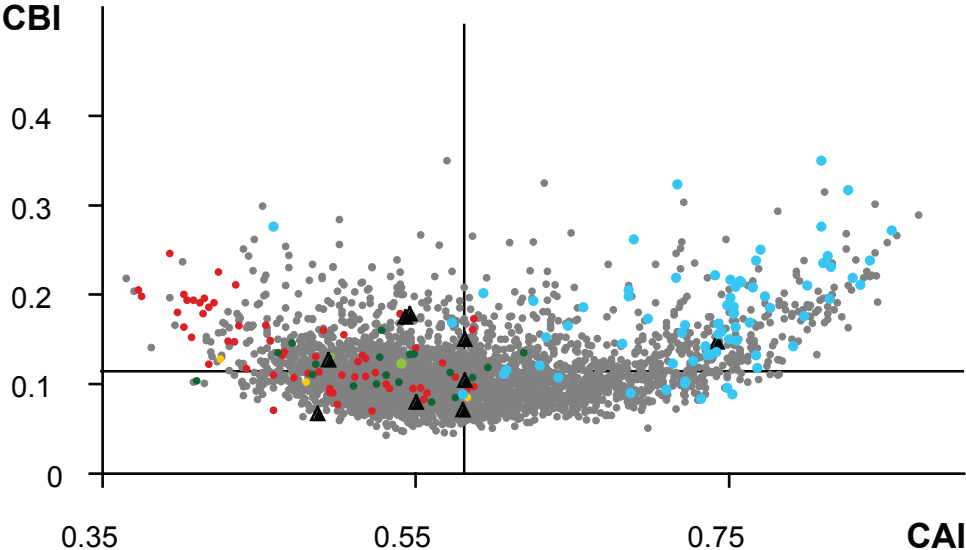

Supplement: 1471-2164-9-616-S3.pdf [file 1471-2164-9-616-S3.pdf]
