# Supplementary material for: The genome sequence of the fish pathogen Aliivibrio salmonicida strain LFI1238 shows extensive evidence of gene decay
Source: PubMed Central journal article supplement (PMC2627896; doi:10.1186/1471-2164-9-616), 2008-12-19

**Additional file 5.** Genomic organisation of the *A. salmonicida* inserted phage  $\phi$ VS4 and comparison with the related phage K139.

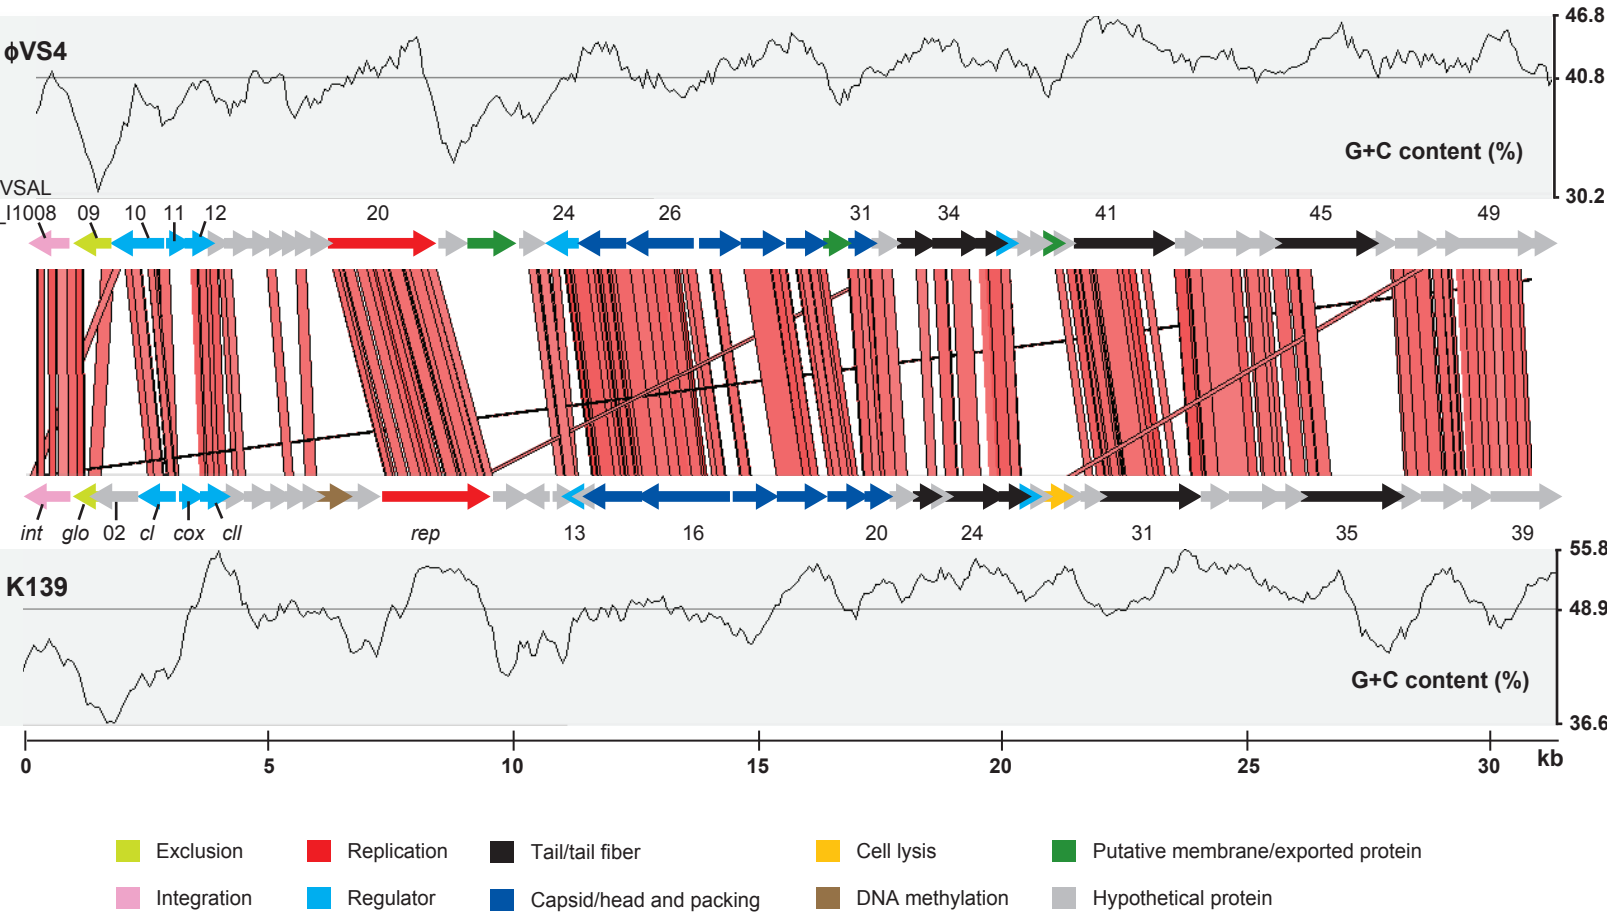

Supplement: 1471-2164-9-616-S5.pdf [file 1471-2164-9-616-S5.pdf]
