# Supplementary material for: The genome sequence of the fish pathogen Aliivibrio salmonicida strain LFI1238 shows extensive evidence of gene decay
Source: PubMed Central journal article supplement (PMC2627896; doi:10.1186/1471-2164-9-616), 2008-12-19
Supplement: 1471-2164-9-616-S6.pdf [file 1471-2164-9-616-S6.pdf]

**Additional file 6.** CDSs harboured on putative genomic islands and phages in *A. salmonicida*.

| CDS          | Size | Predicted product                                | Similar to                            | Acc. No. | Identity (%) | E-value   |
|--------------|------|--------------------------------------------------|---------------------------------------|----------|--------------|-----------|
| <b>Chr I</b> |      |                                                  |                                       |          |              |           |
| <b>φVS1</b>  |      |                                                  |                                       |          |              |           |
| VSAL_I0388   | 93   | hypothetical protein, putative phage gene        | None                                  |          |              |           |
| VSAL_I0389   | 279  | hypothetical protein, putative phage gene        | <i>Vibrio parahaemolyticus</i>        | Q8L0W3   | 64           | 2.60E-25  |
| VSAL_I0390   | 130  | hypothetical protein, putative phage gene        | None                                  |          |              |           |
| VSAL_I0391   | 341  | hypothetical protein, ADP-ribose binding protein | <i>Marinobacter sp.</i>               | A3JFC2   | 36           | 4.30E-36  |
| VSAL_I0392   | 71   | hypothetical protein, putative phage gene        | None                                  |          |              |           |
| VSAL_I0393   | 140  | transposase                                      | <i>Hahella chejuensis</i>             | Q2SAQ2   | 84           | 2.70E-45  |
| VSAL_I0394   | 188  | transposase                                      | <i>Hahella chejuensis</i>             | Q2SMC4   | 47           | 1.10E-34  |
| VSAL_I0395*  | 117  | hypothetical protein, putative phage gene        | None                                  |          |              |           |
| VSAL_I0396   | 358  | hypothetical protein, putative phage gene        | <i>Escherichia coli</i>               | A1Z2R1   | 36           | 1.40E-38  |
| VSAL_I0397   | 353  | shufflon-specific DNA recombinase                | <i>Escherichia coli</i>               | P16470   | 36           | 1.00E-14  |
| VSAL_I0398   | 356  | shufflon-specific DNA recombinase                | <i>Escherichia coli</i>               | P10487   | 30           | 1.30E-11  |
| <b>φVS2</b>  |      |                                                  |                                       |          |              |           |
| VSAL_I0764*  | 495  | transposase                                      | <i>Shewanella sp.</i>                 | A1RLT8   | 57           | 2.10E-119 |
| VSAL_I0765   | 115  | transposase                                      | <i>Pseudoalteromonas haloplanktis</i> | Q3IIG1   | 58           | 1.40E-31  |
| VSAL_I0766   | 104  | transposase                                      | <i>Pseudoalteromonas haloplanktis</i> | Q3IIG2   | 30           | 4.10E-06  |
| VSAL_I0767*  | 48   | hypothetical protein, putative phage gene        | <i>Bacteriophage Mu</i>               | P79677   | 49           | 0.0037    |
| VSAL_I0768   | 176  | hypothetical protein, putative phage gene        | <i>Allivibrio fischeri</i>            | Q5E392   | 52           | 1.60E-35  |
| VSAL_I0769   | 157  | hypothetical protein, putative phage gene        | <i>Allivibrio fischeri</i>            | Q5E391   | 58           | 3.00E-39  |
| VSAL_I0770   | 152  | hypothetical protein, putative phage gene        | <i>Allivibrio fischeri</i>            | Q5E390   | 63           | 1.30E-35  |
| VSAL_I0771   | 344  | phage major capsid protein                       | <i>Bacteriophage PK</i>               | Q94MC7   | 39           | 7.90E-38  |
| VSAL_I0772   | 290  | probable capsid scaffolding protein              | <i>Bacteriophage HP1</i>              | P51719   | 36           | 1.00E-15  |
| VSAL_I0773   | 598  | putative bacteriophage terminase                 | <i>Pseudomonas phage phi CTX</i>      | Q9ZXM5   | 39           | 7.20E-74  |
| VSAL_I0774*  | 316  | putative portal vertex protein                   | <i>Bacteriophage P2</i>               | P25480   | 41           | 6.20E-09  |
| VSAL_I0775   | 337  | putative exported protein, putative phage gene   | None                                  |          |              |           |
| VSAL_I0776   | 153  | hypothetical protein, putative phage gene        | <i>Allivibrio fischeri</i>            | Q5E1J4   | 61           | 5.70E-32  |
| VSAL_I0777   | 251  | N-acetylmuramoyl-L-alanine amidase               | <i>Yersinia pestis bv. Antiqua</i>    | Q1C6W7   | 65           | 4.10E-68  |
| VSAL_I0778   | 120  | hypothetical protein, putative phage gene        | None                                  |          |              |           |
| VSAL_I0779   | 56   | putative membrane protein, putative phage gene   | None                                  |          |              |           |
| VSAL_I0780   | 132  | putative membrane protein, putative phage gene   | <i>Bacteriophage T5</i>               | Q6QGP7   | 38           | 8.20E-05  |
| VSAL_I0781   | 104  | transposase                                      | <i>Pseudoalteromonas haloplanktis</i> | Q3IIG2   | 30           | 4.10E-06  |
| VSAL_I0782   | 115  | transposase                                      | <i>Pseudoalteromonas haloplanktis</i> | Q3IIG1   | 58           | 1.40E-31  |
| VSAL_I0783   | 495  | transposase                                      | <i>Shewanella sp.</i>                 | A1RLT8   | 57           | 1.10E-119 |

**φVS3**

|            |     |                                                |
|------------|-----|------------------------------------------------|
| VSAI_10966 | 453 | putative phage recombinase/integrase           |
| VSAI_10967 | 173 | hypothetical protein, putative phage gene      |
| VSAI_10968 | 807 | putative site-specific recombinase             |
| VSAI_10968 | 779 | putative exported protein, putative phage gene |

|                                |        |    |           |
|--------------------------------|--------|----|-----------|
| <i>Bacillus subtilis</i>       | P39776 | 16 | 3.00E-04  |
| <i>Vibrio parahaemolyticus</i> | A6B1Z2 | 58 | 1.20E-32  |
| <i>Vibrio alginolyticus</i>    | Q1V881 | 49 | 2.10E-77  |
| <i>Vibrio alginolyticus</i>    | Q1V882 | 44 | 6.00E-134 |

**φVS4**

|             |     |                                                                    |
|-------------|-----|--------------------------------------------------------------------|
| VSAI_11008  | 347 | phage integrase                                                    |
| VSAI_11009  | 262 | probable exclusion protein                                         |
| VSAI_11010  | 318 | probable phage regulatory protein CI                               |
| VSAI_11011  | 66  | probable phage regulatory protein                                  |
| VSAI_11012  | 180 | phage regulatory protein CII                                       |
| VSAI_11013  | 107 | hypothetical protein, putative phage gene                          |
| VSAI_11014  | 160 | hypothetical protein, putative phage gene                          |
| VSAI_11015  | 133 | hypothetical protein, putative phage gene                          |
| VSAI_11016  | 42  | hypothetical protein, putative phage gene                          |
| VSAI_11017  | 90  | hypothetical protein, putative phage gene                          |
| VSAI_11018  | 76  | hypothetical protein, putative phage gene                          |
| VSAI_11019  | 119 | hypothetical protein, putative phage gene                          |
| VSAI_11020  | 837 | phage replication protein                                          |
| VSAI_11021  | 384 | hypothetical protein, putative phage gene                          |
| VSAI_11022  | 304 | membrane protein, putative phage gene                              |
| VSAI_11023  | 84  | hypothetical protein, putative phage gene                          |
| VSAI_11024  | 154 | phage zinc-binding transcriptional activator                       |
| VSAI_11025  | 344 | phage portal protein                                               |
| VSAI_11026  | 590 | terminase, ATPase subunit                                          |
| VSAI_11027  | 291 | phage capsid scaffolding protein                                   |
| VSAI_11028  | 336 | major capsid protein                                               |
| VSAI_11029  | 238 | phage terminase, endonuclease subunit                              |
| VSAI_11030  | 113 | membrane protein, putative phage gene                              |
| VSAI_11031  | 154 | probable head completion/stabilization protein                     |
| VSAI_11032  | 174 | hypothetical protein, putative phage gene                          |
| VSAI_11033* | 236 | putative tail completion protein                                   |
| VSAI_11034  | 370 | putative tail sheath protein                                       |
| VSAI_11035  | 151 | probable tail tube protein                                         |
| VSAI_11036  | 71  | probable rRNA transcription initiator protein, putative phage gene |
| VSAI_11037  | 140 | hypothetical protein, putative phage gene                          |

|                                                               |        |    |           |
|---------------------------------------------------------------|--------|----|-----------|
| <i>Bacteriophage 186</i>                                      | P06723 | 47 | 2.60E-53  |
| <i>Vibrio phage K139</i>                                      | Q37932 | 29 | 1.70E-06  |
| <i>Vibrio phage K139</i>                                      | Q9XJF9 | 47 | 4.10E-21  |
| <i>Haemophilus phage HP2</i>                                  | Q775G1 | 32 | 0.16      |
| <i>Vibrio phage K139</i>                                      | Q9XJF7 | 67 | 3.00E-44  |
| <i>Vibrio phage K139</i>                                      | Q8W766 | 38 | 6.00E-08  |
| <i>Vibrio phage K139</i>                                      | Q8W765 | 29 | 1.00E-04  |
| <i>Vibrio phage K139</i>                                      | Q8W764 | 36 | 5.4       |
| None                                                          |        |    |           |
| <i>Bacteriophage phi1026b</i>                                 | Q6JIJ0 | 30 | 0.22      |
| <i>Vibrio phage K139</i>                                      | Q8W762 | 33 | 1.90E-07  |
| None                                                          |        |    |           |
| <i>Bacteriophage 186</i>                                      | P41064 | 42 | 1.00E-58  |
| None                                                          |        |    |           |
| <i>Aliivibrio fischeri</i>                                    | Q5E372 | 83 | 4.60E-91  |
| <i>Vibrio phage K139</i>                                      | Q8W756 | 50 | 9.40E-09  |
| <i>Vibrio phage K139</i>                                      | Q8W755 | 56 | 5.20E-14  |
| <i>Vibrio phage K139</i>                                      | Q8W753 | 66 | 1.20E-85  |
| <i>Vibrio phage K139</i>                                      | Q8W752 | 67 | 3.00E-143 |
| <i>Vibrio phage K139</i>                                      | Q8W751 | 49 | 4.00E-41  |
| <i>Vibrio phage K139</i>                                      | Q8W750 | 48 | 2.00E-52  |
| <i>Vibrio phage K139</i>                                      | Q8W749 | 51 | 2.70E-49  |
| None                                                          |        |    |           |
| <i>Vibrio phage K139</i>                                      | Q8W748 | 51 | 2.50E-26  |
| <i>Vibrio phage K139</i>                                      | Q8W747 | 34 | 1.20E-15  |
| <i>Pseudomonas syringae pv. phaseolicola Prophage pspph06</i> | Q48C42 | 43 | 7.80E-11  |
| <i>Haemophilus phage HP2</i>                                  | Q94MY9 | 51 | 9.30E-68  |
| <i>Vibrio phage K139</i>                                      | Q8W743 | 56 | 8.20E-27  |
|                                                               | Q8W742 | 51 | 5.90E-09  |
| <i>Photobacterium profundum</i>                               | Q6LLE3 | 61 | 2.10E-19  |

|            |     |                                                |                                    |        |    |           |
|------------|-----|------------------------------------------------|------------------------------------|--------|----|-----------|
| VSAL_I1038 | 81  | hypothetical protein, putative phage gene      | <i>Vibrio harveyi</i>              | A7N394 | 66 | 3.80E-19  |
| VSAL_I1039 | 79  | probable exported protein, putative phage gene | <i>Vibrio harveyi</i>              | A7N395 | 66 | 1.70E-16  |
| VSAL_I1040 | 87  | hypothetical protein, putative phage gene      | <i>Haemophilus phage HP2</i>       | Q775G2 | 33 | 4.00E-05  |
| VSAL_I1041 | 704 | probable tail length determinant               | <i>Vibrio phage K139</i>           | Q8W737 | 56 | 3.20E-101 |
| VSAL_I1042 | 108 | hypothetical protein, putative phage gene      | <i>Vibrio phage K139</i>           | Q8W736 | 54 | 5.30E-13  |
| VSAL_I1043 | 394 | hypothetical protein, putative phage gene      | <i>Vibrio phage K139</i>           | Q8W735 | 51 | 1.00E-75  |
| VSAL_I1044 | 196 | hypothetical protein, putative phage gene      | <i>Vibrio phage K139</i>           | Q8W734 | 50 | 1.30E-35  |
| VSAL_I1045 | 690 | tail fiber protein                             | <i>Bacteriophage HP1</i>           | P51735 | 28 | 2.20E-35  |
| VSAL_I1046 | 147 | hypothetical protein, putative phage gene      | <i>Aliivibrio fischeri</i>         | Q5E382 | 81 | 3.50E-42  |
| VSAL_I1047 | 297 | hypothetical protein, putative phage gene      | <i>Vibrio phage K139</i>           | Q8W731 | 42 | 1.00E-41  |
| VSAL_I1048 | 182 | hypothetical protein, putative phage gene      | <i>Yersinia pseudotuberculosis</i> | Q666T6 | 39 | 1.40E-14  |
| VSAL_I1049 | 541 | hypothetical protein, putative phage gene      | <i>Vibrio phage K139</i>           | Q8W729 | 47 | 2.60E-82  |
| VSAL_I1050 | 65  | hypothetical protein, putative phage gene      | <i>Aliivibrio fischeri</i>         | Q5E377 | 86 | 1.00E-17  |
| VSAL_I1051 | 293 | transposase                                    | <i>Shewanella denitrificans</i>    | Q12IQ1 |    | 2.30E-75  |

#### φVS5

|             |     |                                                           |                                       |         |    |           |
|-------------|-----|-----------------------------------------------------------|---------------------------------------|---------|----|-----------|
| VSAL_I1921  | 321 | putative membrane protein, putative phage gene            | None                                  |         |    |           |
| VSAL_I1922  | 741 | putative exported protein, putative phage gene            | None                                  |         |    |           |
| VSAL_I1923* | 296 | putative outer membrane protein OmpA, putative phage gene | <i>Vibrio alginolyticus</i>           | Q1VVCV6 | 32 | 4.20E-16  |
| VSAL_I1924  | 206 | putative exported protein, putative phage gene            | <i>Enterobacteria phage phiEco32</i>  | B0FIT1  | 40 | 9.00E-10  |
| VSAL_I1925  | 208 | immunoglobulin-binding regulator                          | <i>Escherichia coli</i>               | Q8KU23  | 35 | 4.10E-17  |
| VSAL_I1926* | 380 | immunoglobulin-binding regulator                          | <i>Escherichia coli</i>               | Q8KU24  | 43 | 7.90E-44  |
| VSAL_I1927  | 192 | hypothetical protein, putative phage gene                 | <i>Aliivibrio fischeri</i>            | Q5E397  | 43 | 9.70E-22  |
| VSAL_I1928  | 104 | transposase                                               | <i>Pseudoalteromonas haloplanktis</i> | Q3IIG2  | 30 | 4.10E-06  |
| VSAL_I1929  | 115 | transposase                                               | <i>Pseudoalteromonas haloplanktis</i> | Q3IIG1  | 58 | 1.40E-31  |
| VSAL_I1930  | 495 | transposase                                               | <i>Shewanella sp.</i>                 | A1RLT8  | 57 | 1.10E-119 |

#### φVS6

|             |     |                                              |                                       |        |    |           |
|-------------|-----|----------------------------------------------|---------------------------------------|--------|----|-----------|
| VSAL_I2480  | 413 | integrase, phage family                      | <i>Vibrio cholerae</i>                | Q57497 | 71 | 1.90E-117 |
| VSAL_I2481  | 249 | hypothetical protein, putative phage gene    | None                                  |        |    |           |
| VSAL_I2482  | 976 | putative ABC transporter, ATP-binding domain | None                                  |        |    |           |
| VSAL_I2483* | 649 | putative type I restriction enzyme R protein | <i>Escherichia coli</i>               | P10486 | 35 | 5.50E-43  |
| VSAL_I2484  | 104 | transposase                                  | <i>Pseudoalteromonas haloplanktis</i> | Q3IIG2 | 30 | 4.10E-06  |
| VSAL_I2485  | 115 | transposase                                  | <i>Pseudoalteromonas haloplanktis</i> | Q3IIG1 | 58 | 1.40E-31  |
| VSAL_I2486  | 495 | transposase                                  | <i>Shewanella sp.</i>                 | A1RLT8 | 57 | 1.10E-119 |
| VSAL_I2487* | 495 | transposase                                  | <i>Shewanella sp.</i>                 | A1RLT8 | 56 | 3.00E-117 |
| VSAL_I2488  | 115 | transposase                                  | <i>Pseudoalteromonas haloplanktis</i> | Q3IIG1 | 58 | 1.40E-31  |
| VSAL_I2489  | 104 | transposase                                  | <i>Pseudoalteromonas haloplanktis</i> | Q3IIG2 | 30 | 4.10E-06  |

#### GI-VS1

|            |     |                                            |                                 |        |    |           |
|------------|-----|--------------------------------------------|---------------------------------|--------|----|-----------|
| VSAL_I0019 | 397 | transposase                                | <i>Pasteurella piscicida</i>    | A0PB90 | 52 | 9.70E-85  |
| VSAL_I0020 | 84  | hypothetical protein                       | <i>Aliivibrio fischeri</i>      | Q5DY95 | 87 | 2.10E-30  |
| VSAL_I0021 | 319 | antirestriction protein                    | <i>Escherichia coli</i>         | Q6XGE4 | 50 | 2.10E-49  |
| VSAL_I0022 | 397 | transposase                                | <i>Pasteurella piscicida</i>    | A0PB90 | 52 | 9.70E-85  |
| VSAL_I0023 | 281 | metallo-beta-lactamase superfamily protein | <i>Shewanella pealeana</i>      | A8H4L9 | 83 | 1.50E-102 |
| VSAL_I0024 | 183 | adenylate cyclase                          | <i>Aeromonas hydrophila</i>     | O69199 | 64 | 2.40E-41  |
| VSAL_I0025 | 121 | putative exported protein                  | <i>Vibrio parahaemolyticus</i>  | Q87PY1 | 55 | 6.40E-23  |
| VSAL_I0026 | 134 | hypothetical protein                       | <i>Vibrio alginolyticus</i>     | Q1VCC3 | 67 | 6.80E-38  |
| VSAL_I0027 | 259 | hypothetical protein                       | <i>Escherichia coli</i>         | Q0E860 | 24 | 2.00E-09  |
| VSAL_I0028 | 317 | hypothetical protein                       | <i>Photobacterium profundum</i> | Q6LWB9 | 94 | 5.00E-126 |
| VSAL_I0029 | 320 | transposase                                | <i>Photorhabdus luminescens</i> | Q8GDK9 | 58 | 3.00E-76  |
| VSAL_I0030 | 96  | hypothetical protein                       | None                            |        |    |           |
| VSAL_I0031 | 739 | putative cell wall degradation enzyme      | <i>Aliivibrio fischeri</i>      | A9HZV5 | 39 | 2.50E-63  |
| VSAL_I0032 | 129 | putative exported protein                  | None                            |        |    |           |
| VSAL_I0033 | 119 | hypothetical protein                       | None                            |        |    |           |
| VSAL_I0034 | 216 | hypothetical protein                       | None                            |        |    |           |
| VSAL_I0035 | 397 | transposase                                | <i>Pasteurella piscicida</i>    | A0PB90 | 52 | 9.70E-85  |

### GI-VS2

|             |     |                                               |                                       |        |    |           |
|-------------|-----|-----------------------------------------------|---------------------------------------|--------|----|-----------|
| VSAL_I0056  | 397 | transposase                                   | <i>Pasteurella piscicida</i>          | A0PB90 | 52 | 9.70E-85  |
| VSAL_I0057  | 175 | putative exported protein                     | None                                  |        |    |           |
| VSAL_I0058  | 265 | putative chromosome partitioning protein ParA | <i>Bacillus subtilis</i>              | P37522 | 32 | 1.60E-13  |
| VSAL_I0059  | 324 | putative chromosome partitioning protein ParB | <i>Vibrio anguillarum</i>             | Q83XH6 | 37 | 4.80E-31  |
| VSAL_I0060  | 134 | hypothetical protein                          | <i>Vibrio anguillarum</i>             | Q6W4R4 | 49 | 1.20E-24  |
| VSAL_I0061  | 123 | hypothetical protein                          | None                                  |        |    |           |
| VSAL_I0062  | 197 | hypothetical protein                          | <i>Photobacterium profundum</i>       | Q6LWA8 | 37 | 2.00E-20  |
| VSAL_I0063* | 496 | hypothetical protein                          | <i>Photobacterium profundum</i>       | Q6LUB5 | 78 | 4.60E-147 |
| VSAL_I0064* | 76  | hypothetical protein                          | None                                  |        |    |           |
| VSAL_I0065  | 118 | transposase                                   | <i>Vibrionales bacterium SWAT-3</i>   | A5KV91 | 78 | 3.00E-43  |
| VSAL_I0066  | 98  | transposase                                   | <i>Vibrionales bacterium SWAT-3</i>   | A5KV90 | 42 | 0.00063   |
| VSAL_I0067  | 409 | putative hemolysin/hemagglutinin-like protein | <i>Erwinia chrysanthemi</i>           | P94772 | 29 | 3.90E-08  |
| VSAL_I0068  | 495 | transposase                                   | <i>Shewanella sp.</i>                 | A1RLT8 | 56 | 3.00E-117 |
| VSAL_I0069  | 115 | transposase                                   | <i>Pseudoalteromonas haloplanktis</i> | Q3IIG1 | 58 | 1.40E-31  |
| VSAL_I0070  | 104 | transposase                                   | <i>Pseudoalteromonas haloplanktis</i> | Q3IIG2 | 30 | 4.10E-06  |

### GI-VS3

|             |     |             |                                       |        |    |          |
|-------------|-----|-------------|---------------------------------------|--------|----|----------|
| VSAL_I0129  | 104 | transposase | <i>Pseudoalteromonas haloplanktis</i> | Q3IIG2 | 30 | 4.10E-06 |
| VSAL_I0130* | 115 | transposase | <i>Pseudoalteromonas haloplanktis</i> | Q3IIG1 | 65 | 1.10E-17 |
| VSAL_I0131  | 397 | transposase | <i>Pasteurella piscicida</i>          | A0PB90 | 52 | 9.70E-85 |

|            |     |                                               |                                       |        |    |           |
|------------|-----|-----------------------------------------------|---------------------------------------|--------|----|-----------|
| VSAL_I0132 | 196 | putative lipoprotein                          | <i>Vibrio sp.</i>                     | A3XXI3 | 67 | 5.50E-47  |
| VSAL_I0133 | 483 | hypothetical protein                          | <i>Vibrio parahaemolyticus</i>        | Q87GL3 | 68 | 5.90E-130 |
| VSAL_I0134 | 515 | L-2,4-diaminobutyrate decarboxylase           | <i>Rhizobium meliloti</i>             | Q9Z3R1 | 36 | 3.00E-36  |
| VSAL_I0135 | 442 | siderophore biosynthesis protein lucD         | <i>Escherichia coli</i>               | Q47318 | 26 | 6.20E-41  |
| VSAL_I0136 | 818 | siderophore biosynthesis protein lucC         | <i>Escherichia coli</i>               | P11295 | 33 | 1.00E-45  |
| VSAL_I0137 | 721 | tonB-dependent iron-siderophore receptor FhuE | <i>Escherichia coli</i>               | P16869 | 35 | 6.90E-71  |
| VSAL_I0138 | 316 | iron-siderophore ABC transporter FepB         | <i>Escherichia coli</i>               | P0AEL6 | 22 | 4.80E-05  |
| VSAL_I0139 | 366 | iron-siderophore ABC transporter FepD         | <i>Escherichia coli</i>               | P23876 | 40 | 1.70E-34  |
| VSAL_I0140 | 341 | iron-siderophore ABC transporter FecD         | <i>Escherichia coli</i>               | P15029 | 36 | 9.80E-24  |
| VSAL_I0141 | 268 | iron-siderophore ABC transporter FepC         | <i>Escherichia coli</i>               | P23878 | 44 | 2.30E-33  |
| VSAL_I0142 | 104 | transposase                                   | <i>Pseudoalteromonas haloplanktis</i> | Q3IIG2 | 30 | 4.10E-06  |
| VSAL_I0143 | 115 | transposase                                   | <i>Pseudoalteromonas haloplanktis</i> | Q3IIG1 | 58 | 1.40E-31  |
| VSAL_I0144 | 495 | transposase                                   | <i>Shewanella sp.</i>                 | A1RLT8 | 57 | 1.10E-119 |

#### GI-VS4

|            |     |                                        |                                     |        |    |           |
|------------|-----|----------------------------------------|-------------------------------------|--------|----|-----------|
| VSAL_I0872 | 58  | hypothetical protein                   | None                                |        |    |           |
| VSAL_I0873 | 243 | hypothetical protein                   | <i>Moritella sp.</i>                | A6FBR2 | 70 | 1.50E-77  |
| VSAL_I0874 | 556 | hypothetical protein                   | <i>Moritella sp.</i>                | A6FBR3 | 75 | 1.20E-192 |
| VSAL_I0875 | 524 | glycine betaine transporter OpuD       | <i>Bacillus subtilis</i>            | P54417 | 33 | 3.40E-46  |
| VSAL_I0876 | 329 | membrane dipeptidase                   | <i>Vibrio sp.</i>                   | A7K3B0 | 92 | 3.70E-134 |
| VSAL_I0877 | 487 | aldehyde dehydrogenase                 | <i>Bacillus stearothermophilus</i>  | P42329 | 38 | 2.00E-63  |
| VSAL_I0878 | 127 | endoribonuclease L-PSP                 | <i>Vibrio alginolyticus</i>         | Q1V948 | 87 | 6.90E-45  |
| VSAL_I0879 | 292 | transcriptional regulator, LysR-family | <i>Vibrionales bacterium SWAT-3</i> | A5KWH7 | 87 | 1.50E-105 |
| VSAL_I0880 | 72  | hypothetical protein                   | None                                |        |    |           |
| VSAL_I0881 | 258 | putative exported protein              | <i>Vibrio splendidus</i>            | A3UNN5 | 59 | 1.10E-61  |
| VSAL_I0882 | 251 | putative exported protein              | <i>Vibrio splendidus</i>            | A3UNN4 | 47 | 2.80E-49  |
| VSAL_I0883 | 863 | putative exported protein              | <i>Vibrio splendidus</i>            | A3UNN3 | 55 | 2.90E-205 |
| VSAL_I0884 | 137 | putative exported protein              | <i>Vibrio splendidus</i>            | A3UNZ4 | 46 | 6.40E-19  |

#### GI-VS5

|             |      |                                                  |                                       |        |    |           |
|-------------|------|--------------------------------------------------|---------------------------------------|--------|----|-----------|
| VSAL_I1105  | 104  | transposase                                      | <i>Pseudoalteromonas haloplanktis</i> | Q3IIG2 | 30 | 4.10E-06  |
| VSAL_I1106* | 115  | transposase                                      | <i>Pseudoalteromonas haloplanktis</i> | Q3IIG1 | 58 | 1.40E-31  |
| VSAL_I1107  | 495  | transposase                                      | <i>Shewanella sp.</i>                 | A1RLT8 | 57 | 1.10E-119 |
| VSAL_I1108  | 880  | chitodextrinase                                  | <i>Vibrio furnissii</i>               | P96156 | 77 | 0         |
| VSAL_I1109  | 166  | hypothetical protein                             | <i>Vibrio splendidus</i>              | A3UR09 | 53 | 3.80E-28  |
| VSAL_I1110  | 249  | putative exported protein                        | <i>Aliivibrio fischeri</i>            | Q5E663 | 78 | 4.60E-84  |
| VSAL_I1111* | 112  | hypothetical protein                             | <i>Aliivibrio fischeri</i>            | Q5E662 | 60 | 2.10E-20  |
| VSAL_I1112  | 217  | serine/threonine phosphoprotein phosphatase VasL | <i>Pseudomonas aeruginosa</i>         | Q9I355 | 36 | 9.70E-18  |
| VSAL_I1113* | 1172 | putative type VI secretion protein VasK          | <i>Pseudomonas aeruginosa</i>         | Q9I356 | 36 | 7.20E-150 |

|             |     |                                         |
|-------------|-----|-----------------------------------------|
| VSAL_I1114  | 275 | putative membrane protein VasF          |
| VSAL_I1115  | 440 | putative type VI secretion protein VasE |
| VSAL_I1116  | 162 | putative type VI secretion protein VasD |
| VSAL_I1117  | 453 | putative type VI secretion protein VasC |
| VSAL_I1118* | 507 | transcriptional regulatory protein VasH |
| VSAL_I1119  | 872 | chaperone ClpB VasG                     |
| VSAL_I1120  | 309 | putative type VI secretion protein VasB |
| VSAL_I1121  | 583 | putative type VI secretion protein VasA |
| VSAL_I1122  | 141 | putative type VI secretion protein VasS |
| VSAL_I1123  | 491 | putative type VI secretion protein VasR |
| VSAL_I1124  | 164 | putative type VI secretion protein VasQ |
| VSAL_I1125  | 513 | putative type VI secretion protein VasJ |

### GI-VS6

|             |      |                                              |
|-------------|------|----------------------------------------------|
| VSAL_I1166  | 397  | transposase                                  |
| VSAL_I1167  | 186  | putative type VI secretion protein VasU-1    |
| VSAL_I1168  | 98   | putative type VI secretion protein VasV-1    |
| VSAL_I1169  | 461  | putative type VI secretion protein VasJ-1    |
| VSAL_I1170  | 130  | secreted hemolysin-coregulated protein Hcp-3 |
| VSAL_I1171  | 169  | putative type VI secretion protein VasQ-1    |
| VSAL_I1172  | 493  | putative type VI secretion protein VasRA-1   |
| VSAL_I1173  | 453  | putative type VI secretion protein VasRB-1   |
| VSAL_I1174  | 140  | putative type VI secretion protein VasS-1    |
| VSAL_I1175  | 593  | putative type VI secretion protein VasA-1    |
| VSAL_I1176  | 327  | putative type VI secretion protein VasB-1    |
| VSAL_I1177  | 872  | chaperone ClpB-1 VasG-1                      |
| VSAL_I1178  | 52   | putative type VI secretion protein VasV-1    |
| VSAL_I1179  | 314  | putative type VI secretion protein VasC-1    |
| VSAL_I1180  | 154  | putative type VI secretion protein VasD-1    |
| VSAL_I1181  | 438  | putative type VI secretion protein VasE-1    |
| VSAL_I1182  | 374  | putative type VI secretion protein VasF-1    |
| VSAL_I1183* | 1144 | putative type VI secretion protein VasK-1    |
| VSAL_I1184  | 432  | transposase                                  |
| VSAL_I1185  | 618  | putative type VI secretion protein VasX-1    |

### GI-VS7

|            |     |                      |
|------------|-----|----------------------|
| VSAL_I1463 | 188 | transposase          |
| VSAL_I1464 | 140 | transposase          |
| VSAL_I1465 | 71  | hypothetical protein |

|                               |        |    |           |
|-------------------------------|--------|----|-----------|
| <i>Pseudomonas aeruginosa</i> | Q9I357 | 50 | 1.30E-50  |
| <i>Pseudomonas aeruginosa</i> | Q9I358 | 47 | 1.10E-82  |
| <i>Pseudomonas aeruginosa</i> | Q9I359 | 40 | 3.00E-14  |
| <i>Pseudomonas aeruginosa</i> | Q9I360 | 32 | 1.20E-07  |
| <i>Pseudomonas aeruginosa</i> | Q9I362 | 40 | 3.00E-44  |
| <i>Y. enterocolitica</i>      | Q9F746 | 42 | 9.00E-111 |
| <i>Pseudomonas aeruginosa</i> | Q9I364 | 48 | 2.80E-56  |
| <i>Vibrio cholerae</i>        | Q9KN55 | 36 | 3.30E-74  |
| <i>Pseudomonas aeruginosa</i> | Q9I366 | 33 | 0.0001    |
| <i>Pseudomonas aeruginosa</i> | Q9I367 | 73 | 5.40E-150 |
| <i>Pseudomonas aeruginosa</i> | Q9I368 | 61 | 2.90E-31  |
| <i>Pseudomonas aeruginosa</i> | Q9I369 | 28 | 4.80E-40  |

|                                 |        |    |           |
|---------------------------------|--------|----|-----------|
| <i>Pasteurella piscicida</i>    | A0PB90 | 52 | 9.70E-85  |
| <i>Vibrio splendidus</i>        | A3USE8 | 64 | 7.80E-49  |
| <i>Vibrio splendidus</i>        | A3USE9 | 89 | 6.80E-36  |
| <i>Rhizobium leguminosarum</i>  | Q93ED3 | 24 | 0.0033    |
| <i>Pseudomonas aeruginosa</i>   | Q9I747 | 24 | 0.52      |
| <i>Rhizobium leguminosarum</i>  | Q93ED2 | 48 | 5.20E-21  |
| <i>Rhizobium leguminosarum</i>  | Q93ED1 | 51 | 1.20E-94  |
| <i>Rhizobium leguminosarum</i>  | Q93ED1 | 28 | 1.30E-19  |
| None                            |        |    |           |
| <i>Rhizobium leguminosarum</i>  | Q93EC7 | 28 | 1.00E-44  |
| <i>Pseudomonas aeruginosa</i>   | Q9I743 | 20 | 0.0056    |
| <i>Yersinia enterocolitica</i>  | Q9F746 | 42 | 4.70E-112 |
| None                            |        |    |           |
| <i>Pseudomonas aeruginosa</i>   | Q9I751 | 30 | 4.9       |
| <i>Pseudomonas aeruginosa</i>   | Q9I752 | 34 | 2.80E-07  |
| <i>Rhizobium leguminosarum</i>  | Q93EC4 | 29 | 7.30E-22  |
| <i>Pseudomonas aeruginosa</i>   | Q9I357 | 27 | 8.20E-12  |
| <i>Pseudomonas aeruginosa</i>   | Q9I356 | 26 | 1.10E-56  |
| <i>Enterobacter agglomerans</i> | P71168 | 57 | 4.10E-104 |
| <i>Vibrio splendidus</i>        | A3USC8 | 45 | 1.20E-29  |

|                           |        |    |          |
|---------------------------|--------|----|----------|
| <i>Hahella chejuensis</i> | Q2SMC4 | 47 | 1.10E-34 |
| <i>Hahella chejuensis</i> | Q2SAQ2 | 84 | 2.70E-45 |
| None                      |        |    |          |

|               |     |                                                |                                                           |        |     |          |
|---------------|-----|------------------------------------------------|-----------------------------------------------------------|--------|-----|----------|
| VSAL_I1466    | 318 | transposase                                    | <i>Pseudomonas putida</i>                                 | Q0QXF0 | 39  | 2.10E-40 |
| VSAL_I1467    | 140 | hypothetical protein                           | None                                                      |        |     |          |
| VSAL_I1468*   | 69  | hypothetical protein                           | <i>Vibrio cholerae</i>                                    | Q9KMD8 | 60  | 1.30E-10 |
| VSAL_I1469    | 94  | putative plasmid stabilisation system protein  | <i>Aliivibrio fischeri</i>                                | A9I6D7 | 100 | 3.70E-35 |
| VSAL_I1470    | 82  | conserved hypothetical protein                 | <i>Aliivibrio fischeri</i>                                | A9I6D9 | 100 | 4.40E-31 |
| VSAL_I1471    | 262 | putative antibiotic resistance protein         | <i>Rhizobium leguminosarum</i> <i>bv.</i> <i>trifolii</i> | P42729 | 39  | 1.90E-12 |
| VSAL_I1472    | 150 | NUDIX hydrolase                                | <i>Aliivibrio fischeri</i>                                | Q5E549 | 90  | 2.10E-60 |
| VSAL_I1473    | 166 | putative acetyltransferase                     | <i>Pseudomonas fluorescens</i>                            | Q3KAA5 | 50  | 1.50E-25 |
| VSAL_I1474*   | 50  | hypothetical protein                           | <i>Vibrio cholerae</i>                                    | Q9KRR2 | 70  | 3.50E-13 |
| VSAL_I1475    | 212 | outer membrane protein                         | None                                                      |        |     |          |
| VSAL_I1476    | 143 | membrane protein                               | None                                                      |        |     |          |
| VSAL_I1477    | 140 | transposase                                    | <i>Hahella chejuensis</i>                                 | Q2SAQ2 | 84  | 2.70E-45 |
| VSAL_I1478    | 188 | transposase                                    | <i>Hahella chejuensis</i>                                 | Q2SMC4 | 47  | 1.10E-34 |
| VSAL_I1479*   | 323 | putative acyltransferase                       | <i>Bacillus</i> <i>sp.</i>                                | Q2B5J8 | 36  | 2.00E-28 |
| VSAL_I1480*   | 81  | putative membrane protein                      | <i>Pseudoalteromonas atlantica</i>                        | Q3CS45 | 44  | 8.30E-08 |
| VSAL_I1481    | 135 | putative lipoprotein                           | <i>Vibrio vulnificus</i>                                  | Q7MD73 | 46  | 3.40E-17 |
| VSAL_I1482    | 250 | glucose 1-dehydrogenase                        | <i>Bacillus subtilis</i>                                  | P12310 | 39  | 5.60E-25 |
| VSAL_I1483    | 64  | hypothetical protein                           | <i>Marinomonas</i> <i>sp.</i>                             | A3YG41 | 52  | 1.90E-11 |
| VSAL_I1484    | 238 | short chain dehydrogenase                      | <i>Chlamydia trachomatis</i>                              | P38004 | 34  | 1.40E-15 |
| VSAL_I1485    | 232 | conserved hypothetical protein                 | <i>Colwellia psychrerythraea</i>                          | Q47UH8 | 71  | 5.50E-75 |
| VSAL_I1486    | 176 | cold-shock protein                             | <i>Desulfovibrio vulgaris</i>                             | Q72AY2 | 38  | 1.10E-21 |
| VSAL_I1487    | 117 | conserved hypothetical protein                 | <i>Photobacterium profundum</i>                           | Q1ZAJ5 | 92  | 1.80E-49 |
| VSAL_I1488    | 473 | putative exported protein                      | <i>Vibrio harveyi</i>                                     | A6AP36 | 43  | 4.80E-70 |
| VSAL_I1489    | 130 | hypothetical protein                           | <i>Aliivibrio fischeri</i>                                | A9ICX9 | 92  | 7.10E-45 |
| VSAL_I1490    | 71  | hypothetical protein                           | None                                                      |        |     |          |
| VSAL_I1491    | 140 | transposase                                    | <i>Hahella chejuensis</i>                                 | Q2SAQ2 | 84  | 2.70E-45 |
| VSAL_I1492    | 188 | transposase                                    | <i>Hahella chejuensis</i>                                 | Q2SMC4 | 47  | 1.10E-34 |
| <b>GI-VS8</b> |     |                                                |                                                           |        |     |          |
| VSAL_I1620    | 140 | transposase                                    | <i>Hahella chejuensis</i>                                 | Q2SAQ2 | 84  | 2.70E-45 |
| VSAL_I1621    | 188 | transposase                                    | <i>Hahella chejuensis</i>                                 | Q2SMC4 | 47  | 1.10E-34 |
| VSAL_I1622    | 136 | putative cell wall lytic enzyme                | <i>Aliivibrio fischeri</i>                                | A9I2S4 | 60  | 2.00E-23 |
| VSAL_I1623    | 247 | putative sucrose-6F-phosphate phosphohydrolase | <i>Vibrio</i> <i>sp.</i>                                  | A3Y1Q8 | 62  | 7.70E-65 |
| VSAL_I1624    | 216 | enhancing lycopene biosynthesis protein 2      | <i>Escherichia coli</i>                                   | P0ABU5 | 51  | 1.50E-37 |
| VSAL_I1625    | 134 | hypothetical protein                           | <i>Vibrio alginolyticus</i>                               | Q1VDS1 | 63  | 1.70E-34 |
| VSAL_I1626    | 242 | MltA-interacting protein MipA                  | <i>Vibrio splendidus</i>                                  | A3V023 | 55  | 2.70E-54 |
| VSAL_I1627    | 138 | membrane protein                               | <i>Vibrio harveyi</i>                                     | A6ALV0 | 60  | 5.90E-31 |
| VSAL_I1628    | 320 | putative radical SAM superfamily protein       | <i>Nitrosococcus oceani</i>                               | Q3JDI7 | 63  | 1.60E-86 |
| VSAL_I1629*   | 227 | glycosyl transferase, family 2                 | <i>Nitrosococcus oceani</i>                               | Q3JDI9 | 54  | 2.70E-43 |

|             |     |                         |                             |        |    |          |
|-------------|-----|-------------------------|-----------------------------|--------|----|----------|
| VSAL_I1630  | 204 | hypothetical protein    | <i>Nitrosococcus oceani</i> | Q3JDJ0 | 47 | 1.10E-40 |
| VSAL_I1631* | 436 | sodium/solute symporter | <i>Hahella chejuensis</i>   | Q2S7Q2 | 52 | 5.90E-65 |
| VSAL_I1632  | 140 | transposase             | <i>Hahella chejuensis</i>   | Q2SAQ2 | 84 | 2.70E-45 |
| VSAL_I1633  | 188 | transposase             | <i>Hahella chejuensis</i>   | Q2SMC4 | 47 | 1.10E-34 |

### GI-VS9

|             |      |                                                            |                                   |        |    |           |
|-------------|------|------------------------------------------------------------|-----------------------------------|--------|----|-----------|
| VSAL_I1787  | 199  | GTP cyclohydrolase-2                                       | <i>Photobacterium phosphoreum</i> | P51618 | 67 | 6.60E-48  |
| VSAL_I1788  | 381  | alcohol dehydrogenase 2                                    | <i>Zymomonas mobilis</i>          | P06758 | 62 | 1.70E-86  |
| VSAL_I1789  | 238  | conserved hypothetical protein                             | <i>Vibrio sp.</i>                 | A3XVM5 | 70 | 2.20E-73  |
| VSAL_I1790  | 1072 | restriction enzyme                                         | <i>Pasteurella haemolytica</i>    | P95512 | 28 | 2.80E-27  |
| VSAL_I1791* | 426  | type I restriction-modification system specificity subunit | <i>Shewanella sp.</i>             | Q36AA1 | 36 | 1.00E-35  |
| VSAL_I1792  | 587  | N-6 adenine-specific DNA methylase                         | <i>Salmonella enterica</i>        | P72418 | 33 | 2.40E-42  |
| VSAL_I1793  | 354  | putative exported protein                                  | <i>Aliivibrio fischeri</i>        | A9ICK9 | 69 | 4.10E-101 |
| VSAL_I1794* | 44   | sodium driven multidrug efflux pump                        | <i>Aliivibrio fischeri</i>        | Q5E4U9 | 88 | 1.50E-12  |

### GI-VS10

|             |     |                                                               |                                 |        |    |           |
|-------------|-----|---------------------------------------------------------------|---------------------------------|--------|----|-----------|
| VSAL_I3009  | 370 | transposase                                                   | <i>Shewanella denitrificans</i> | Q12RN8 | 73 | 3.60E-115 |
| VSAL_I3010  | 207 | putative capsular polysaccharide biosynthesis protein NeuD    | <i>Escherichia coli</i>         | Q46674 | 68 | 5.20E-49  |
| VSAL_I3011  | 346 | putative sialic acid synthase NeuB                            | <i>Escherichia coli</i>         | Q46675 | 69 | 6.70E-84  |
| VSAL_I3012  | 417 | N-acylneuraminate cytidyltransferase NeuA                     | <i>Escherichia coli</i>         | P13266 | 52 | 2.30E-77  |
| VSAL_I3013  | 388 | polysialic acid biosynthesis protein NeuC                     | <i>Escherichia coli</i>         | Q47400 | 59 | 2.90E-84  |
| VSAL_I3014  | 422 | putative exopolysaccharide biosynthesis protein               | <i>Aeromonas punctata</i>       | Q7BR79 | 56 | 3.90E-79  |
| VSAL_I3015  | 298 | hypothetical protein                                          | <i>Rhodopirellula baltica</i>   | Q7ULW0 | 35 | 2.00E-18  |
| VSAL_I3016  | 321 | lipooligosaccharide sialyltransferase                         | <i>Escherichia coli</i>         | Q93NP9 | 29 | 5.90E-14  |
| VSAL_I3017  | 374 | transposase                                                   | <i>Vibrio cholerae</i>          | O51837 | 38 | 2.00E-48  |
| VSAL_I3018  | 371 | dTDP-glucose 4,6-dehydratase RmlB                             | <i>Vibrio cholerae</i>          | Q842N5 | 85 | 7.10E-124 |
| VSAL_I3019  | 295 | glucose-1-phosphate thymidyl transferase RmlA                 | <i>Vibrio cholerae</i>          | Q842R4 | 83 | 1.10E-93  |
| VSAL_I3020* | 293 | dTDP-6-deoxy-l-mannose-dehydrogenase RmlD                     | <i>Vibrio cholerae</i>          | Q842P5 | 68 | 2.00E-72  |
| VSAL_I3021  | 184 | dTDP-6-deoxy-D-xylo-4-hexulose-3,5-epimerase RmlC             | <i>Vibrio cholerae</i>          | Q842R2 | 84 | 7.60E-58  |
| VSAL_I3024  | 292 | putative glycosyl transferase                                 | <i>Escherichia coli</i>         | Q9X4C3 | 33 | 1.50E-10  |
| VSAL_I3025  | 427 | membrane protein                                              | None                            |        |    |           |
| VSAL_I3026  | 280 | putative glycosyl transferase WbfP                            | <i>Shigella boydii</i>          | Q6QQW8 | 30 | 2.90E-07  |
| VSAL_I3027  | 267 | putative glycosyl transferase WbfO                            | <i>Vibrio cholerae</i>          | P74947 | 31 | 1.50E-07  |
| VSAL_I3028  | 190 | putative lipopolysaccharide biosynthesis O-acetyl transferase | <i>Escherichia coli</i>         | P37750 | 35 | 2.00E-08  |
| VSAL_I3029  | 378 | putative NAD dependent epimerase/dehydratase WbfW             | <i>Vibrio cholerae</i>          | Q56626 | 26 | 9.00E-22  |
| VSAL_I3030  | 333 | putative lipopolysaccharide biosynthesis protein              | <i>Aeromonas hydrophila</i>     |        | 29 | 1.80E-14  |
| VSAL_I3031  | 320 | O-antigen biosynthetic gene WbfT                              | <i>Vibrio cholerae</i>          | Q56623 | 41 | 3.70E-33  |
| VSAL_I3032  | 182 | capsular polysaccharide synthesis enzyme WbfU                 | <i>Vibrio cholerae</i>          | Q56624 | 88 | 1.90E-56  |
| VSAL_I3033  | 644 | polysaccharide biosynthesis protein WbfY                      | <i>Vibrio cholerae</i>          | Q56627 | 71 | 6.80E-152 |



|             |     |                                                                     |                                 |        |    |           |
|-------------|-----|---------------------------------------------------------------------|---------------------------------|--------|----|-----------|
| VSAI_I3032  | 182 | galactosyl transferase, capsular polysaccharide synthesis enzyme    | <i>Vibrio cholerae</i>          | Q56624 | 88 | 1.90E-56  |
| VSAI_I3033  | 644 | polysaccharide biosynthesis protein, putative epimerase/dehydratase | <i>Vibrio cholerae</i>          | Q56627 | 71 | 6.80E-152 |
| VSAI_I3034* | 294 | transposase                                                         | <i>Shewanella putrefaciens</i>  | A4Y9G9 | 67 | 1.90E-40  |
| VSAI_I3035  | 397 | transposase                                                         | <i>Pseudomonas syringae</i>     | P24607 | 46 | 1.20E-78  |
| VSAI_I3036* | 306 | methyl-accepting chemotaxis protein                                 | <i>Shewanella oneidensis</i>    | Q8EGZ8 | 37 | 2.70E-24  |
| VSAI_I3037  | 340 | transposase                                                         | <i>Photobacterium profundum</i> | Q6LH76 | 62 | 6.90E-79  |
| VSAI_I3038  | 180 | putative outer membrane protein                                     | <i>Vibrio vulnificus</i>        | Q7MQ48 | 32 | 1.50E-06  |
| VSAI_I3039  | 397 | transposase                                                         | <i>Pseudomonas syringae</i>     | P24607 | 46 | 1.20E-78  |
| VSAI_I3040  | 105 | putative membrane protein                                           |                                 |        |    |           |
| VSAI_I3041  | 231 | putative glycosyltransferase                                        | <i>Edwardsiella ictaluri</i>    | Q937Y0 | 38 | 1.80E-11  |
| VSAI_I3042* | 378 | transposase                                                         | <i>Escherichia coli</i>         | P76119 | 40 | 1.10E-58  |

## Chr II

### ϕVSA1

|              |     |                                                 |                                     |        |    |           |
|--------------|-----|-------------------------------------------------|-------------------------------------|--------|----|-----------|
| VSAI_II0534  | 327 | site-specific recombinase IntI A                | <i>Aliivibrio fischeri</i>          | Q9AL15 | 80 | 3.90E-99  |
| VSAI_II0535* | 380 | transposase                                     | <i>Alkaliphilus metalliredigens</i> | A6TTH3 | 36 | 2.20E-55  |
| VSAI_II0536  | 251 | membrane protein, putative phage gene           | <i>Aliivibrio fischeri</i>          | Q84B85 | 99 | 4.50E-83  |
| VSAI_II0537  | 237 | hypothetical protein, putative phage gene       | <i>Streptococcus suis</i>           | Q5H807 | 29 | 2.60E-06  |
| VSAI_II0538  | 151 | putative acetyltransferase, putative phage gene | <i>Vibrio cholerae</i>              | Q9KMF8 | 53 | 2.80E-32  |
| VSAI_II0539  | 131 | hypothetical protein, putative phage gene       | <i>Vibrio marinus</i>               | Q9RA16 | 91 | 3.90E-29  |
| VSAI_II0540  | 176 | hypothetical protein, putative phage gene       | <i>Vibrio marinus</i>               | Q9RA15 | 96 | 3.40E-54  |
| VSAI_II0541  | 321 | hypothetical protein, putative phage gene       | None                                |        |    |           |
| VSAI_II0542  | 84  | hypothetical protein, putative phage gene       | <i>Vibrio sp.</i>                   | Q2F9T4 | 77 | 5.80E-26  |
| VSAI_II0543  | 104 | putative plasmid stabilisation system protein   | <i>Vibrio vulnificus</i>            | Q8CMA1 | 64 | 6.00E-23  |
| VSAI_II0544  | 116 | hypothetical protein, putative phage gene       | <i>Vibrionales bacterium SWAT-3</i> | A5L7X1 | 78 | 4.30E-39  |
| VSAI_II0545  | 156 | hypothetical protein, putative phage gene       | <i>Aliivibrio fischeri</i>          | A9I6Q3 | 99 | 2.20E-57  |
| VSAI_II0546  | 200 | putative Fic-related phage protein              | <i>Escherichia coli</i>             | P20605 | 44 | 2.50E-30  |
| VSAI_II0547  | 89  | putative plasmid stabilisation system protein   | <i>Vibrio cholerae</i>              | A3GKT3 | 88 | 1.50E-32  |
| VSAI_II0548  | 92  | putative RelB antitoxin                         | <i>Vibrio cholerae</i>              | Q9KML3 | 78 | 4.30E-27  |
| VSAI_II0549  | 530 | hypothetical protein, putative phage gene       | <i>Shewanella baltica</i>           | A5NCW0 | 53 | 1.40E-117 |
| VSAI_II0550  | 123 | hypothetical protein, putative phage gene       | None                                |        |    |           |
| VSAI_II0551  | 64  | hypothetical protein, putative phage gene       | None                                |        |    |           |
| VSAI_II0552  | 57  | hypothetical protein, putative phage gene       | None                                |        |    |           |
| VSAI_II0553  | 294 | hypothetical protein, putative phage gene       | <i>Burkholderia pseudomallei</i>    | A8KFS6 | 55 | 1.60E-65  |
| VSAI_II0554  | 83  | antitoxin                                       | <i>Escherichia coli</i>             | P69346 | 45 | 1.20E-08  |
| VSAI_II0555  | 86  | toxin                                           | <i>Escherichia coli</i>             | P69348 | 65 | 7.10E-21  |
| VSAI_II0556  | 60  | hypothetical protein, putative phage gene       | None                                |        |    |           |

|              |     |                                           |                                     |        |    |          |
|--------------|-----|-------------------------------------------|-------------------------------------|--------|----|----------|
| VSAL_II0557  | 380 | transposase                               | <i>Alkaliphilus metalliredigens</i> | A6TTH3 | 36 | 2.20E-55 |
| VSAL_II0548  | 85  | hypothetical protein, putative phage gene | <i>Vibrio cholerae</i>              | A2PEQ3 | 87 | 8.10E-33 |
| VSAL_II0559  | 174 | hypothetical protein, putative phage gene | <i>Vibrio cholerae</i>              | A5EZL3 | 66 | 2.30E-45 |
| VSAL_II0560  | 134 | hypothetical protein, putative phage gene | <i>Aliivibrio fischeri</i>          | A9IET2 | 63 | 1.50E-38 |
| VSAL_II0561  | 103 | transposase                               | <i>Vibrio cholerae</i>              | Q9K344 | 76 | 1.10E-23 |
| VSAL_II0562  | 278 | transposase                               | <i>Vibrio cholerae</i>              | Q9K3D5 | 64 | 3.40E-81 |
| VSAL_II0563* | 78  | transposase                               | <i>Geobacillus kaustophilus</i>     | Q5L3N6 | 55 | 9.10E-10 |
| VSAL_II0564  | 82  | hypothetical protein, putative phage gene | <i>Aliivibrio fischeri</i>          | Q5DZV7 | 89 | 6.00E-33 |
| VSAL_II0565  | 442 | putative ATP-dependent RNA helicase RhIE  | <i>Escherichia coli</i>             | P25888 | 48 | 1.60E-63 |
| VSAL_II0566  | 175 | hypothetical protein                      | None                                |        |    |          |

### φVSA2

|              |     |                                                |                                |        |    |          |
|--------------|-----|------------------------------------------------|--------------------------------|--------|----|----------|
| VSAL_II0629* | 36  | hypothetical protein, putative phage gene      | None                           |        |    |          |
| VSAL_II0630  | 58  | phage replication repressor RstR               | <i>Vibrio cholerae</i>         | Q9RQF7 | 78 | 2.30E-14 |
| VSAL_II0631  | 415 | phage replication and integration protein      | <i>Vibrio parahaemolyticus</i> | Q9KGQ3 | 54 | 6.90E-74 |
| VSAL_II0632* | 78  | hypothetical protein, putative phage integrase | <i>Bacteriophage Vfo4K68</i>   | Q9MBX6 | 52 | 0.00043  |
| VSAL_II0633  | 58  | phage replication repressor RstR               | <i>Vibrio cholerae</i>         | Q9RQF7 | 78 | 2.30E-14 |
| VSAL_II0634  | 415 | phage replication protein                      | <i>Vibrio parahaemolyticus</i> | Q9KGQ3 | 53 | 6.40E-74 |
| VSAL_II0635* | 87  | hypothetical protein, putative phage integrase | <i>Vibrio phage Vf12</i>       | O88148 | 58 | 3.70E-17 |
| VSAL_II0636  | 103 | putative translation initiation factor SUI1    | <i>Aliivibrio fischeri</i>     | Q5E003 | 88 | 6.30E-38 |
| VSAL_II0637  | 116 | hypothetical protein, putative phage gene      | <i>Aliivibrio fischeri</i>     | A9I735 | 77 | 8.70E-38 |
| VSAL_II0638  | 305 | putative phage recombinase                     | <i>Selenomonas ruminantium</i> | Q845Z5 | 29 | 1.10E-08 |

### φVSA3

|             |     |                                                       |                                |        |    |          |
|-------------|-----|-------------------------------------------------------|--------------------------------|--------|----|----------|
| VSAL_II0739 | 158 | putative phage replication protein                    | <i>Bacteriophage P2</i>        | Q06419 | 33 | 1.70E-05 |
| VSAL_II0740 | 95  | hypothetical protein, putative phage gene             | None                           |        |    |          |
| VSAL_II0741 | 77  | putative phage zinc-binding transcriptional activator | <i>Bacteriophage L-413C</i>    | Q858U4 | 41 | 6.80E-06 |
| VSAL_II0742 | 221 | putative HNH endonuclease                             | <i>Vibrio parahaemolyticus</i> | A6AYA5 | 50 | 7.90E-49 |
| VSAL_II0743 | 414 | hypothetical protein, putative phage gene             | None                           |        |    |          |
| VSAL_II0744 | 90  | putative phage zinc-binding transcriptional activator | <i>Pseudomonas phage Psp3</i>  | Q37973 | 35 | 0.27     |
| VSAL_II0745 | 338 | major capsid protein                                  | <i>Bacteriophage HP1</i>       | P51720 | 28 | 2.00E-20 |

### GI-VSA1

|             |     |                           |                                     |        |    |          |
|-------------|-----|---------------------------|-------------------------------------|--------|----|----------|
| VSAL_II0117 | 397 | transposase               | <i>Pseudomonas syringae</i>         | P24607 | 46 | 1.20E-78 |
| VSAL_II0118 | 214 | membrane protein          | <i>Pasteurella piscicida</i>        | Q6ZXD3 | 54 | 1.70E-17 |
| VSAL_II0119 | 174 | putative exported protein | <i>Vibrionales bacterium SWAT-3</i> | A5L0Q4 | 75 | 7.50E-51 |
| VSAL_II0120 | 291 | putative membrane protein | <i>Vibrio parahaemolyticus</i>      | Q87JT9 | 80 | 3.30E-94 |
| VSAL_II0121 | 105 | putative exported protein | <i>Photobacterium profundum</i>     | Q6LHZ8 | 83 | 2.60E-32 |

|                |      |                                                     |                                       |        |    |           |
|----------------|------|-----------------------------------------------------|---------------------------------------|--------|----|-----------|
| VSAL_II0122    | 187  | putative membrane protein                           | <i>Vibrio harveyi</i>                 | A6AU28 | 48 | 1.50E-32  |
| VSAL_II0123    | 307  | ABC transporter, periplasmic solute binding protein | <i>Streptococcus sanguis</i>          | P31304 | 27 | 8.10E-14  |
| VSAL_II0124    | 254  | ABC transporter, ATP binding protein                | <i>Bacillus subtilis</i>              | O34338 | 33 | 5.70E-17  |
| VSAL_II0125    | 291  | ABC transporter, membrane component                 | <i>Photobacterium sp.</i>             | Q2BZL1 | 91 | 3.00E-93  |
| VSAL_II0126    | 294  | membrane protein                                    | <i>Vibrio angustum</i>                | Q1ZVE4 | 60 | 1.30E-70  |
| VSAL_II0127    | 273  | hypothetical protein, putative phage gene           | <i>Streptococcus pyogenes</i>         | Q8K7P3 | 32 | 3.90E-05  |
| VSAL_II0128    | 108  | hypothetical protein, putative phage gene           | None                                  |        |    |           |
| <b>GI-VSA2</b> |      |                                                     |                                       |        |    |           |
| VSAL_II0202    | 397  | transposase                                         | <i>Pseudomonas syringae</i>           | P24607 | 46 | 1.20E-78  |
| VSAL_II0203    | 65   | hypothetical protein                                | None                                  |        |    |           |
| VSAL_II0204    | 85   | hypothetical protein                                | None                                  |        |    |           |
| VSAL_II0205    | 200  | hypothetical protein                                | None                                  |        |    |           |
| VSAL_II0206    | 186  | putative O-acetyltransferase                        | <i>Vibrio cholerae</i>                | Q06962 | 43 | 2.00E-24  |
| VSAL_II0207*   | 235  | hypothetical protein                                | None                                  |        |    |           |
| VSAL_II0208    | 397  | transposase                                         | <i>Pseudomonas syringae</i>           | P24607 | 46 | 1.20E-78  |
| <b>GI-VSA3</b> |      |                                                     |                                       |        |    |           |
| VSAL_II0257*   | 491  | transposase                                         | <i>Shewanella sp.</i>                 | A1RLT8 | 57 | 2.10E-118 |
| VSAL_II0258    | 115  | transposase                                         | <i>Pseudoalteromonas haloplanktis</i> | Q3IIG1 | 58 | 1.40E-31  |
| VSAL_II0259    | 104  | transposase                                         | <i>Pseudoalteromonas haloplanktis</i> | Q3IIG2 | 30 | 4.10E-06  |
| VSAL_II0260    | 293  | transposase                                         | <i>Shewanella denitrificans</i>       | Q12IQ1 | 60 | 1.10E-75  |
| VSAL_II0261    | 142  | hypothetical protein                                | None                                  |        |    |           |
| VSAL_II0262    | 451  | membrane protein                                    | <i>Methylibium petroleiphilum</i>     | A2SMZ1 | 32 | 2.50E-32  |
| VSAL_II0263    | 278  | putative short chain dehydrogenase                  | <i>Leptospira interrogans</i>         | Q8EXT7 | 37 | 1.60E-30  |
| VSAL_II0264    | 166  | hypothetical protein                                | None                                  |        |    |           |
| VSAL_II0265    | 221  | hypothetical protein                                | None                                  |        |    |           |
| VSAL_II0266    | 329  | hypothetical protein                                | None                                  |        |    |           |
| VSAL_II0267    | 335  | HTH-type transcriptional regulator, AraC family     | <i>Mycobacterium tuberculosis</i>     | Q06861 | 24 | 6.00E-17  |
| VSAL_II0268    | 301  | putative exported protein                           | <i>Allivibrio fischeri</i>            | Q5DZ88 | 74 | 1.50E-99  |
| VSAL_II0269    | 1032 | putative membrane protein                           | <i>Allivibrio fischeri</i>            | Q5DZ89 | 72 | 3.00E-187 |
| VSAL_II0270    | 491  | transposase                                         | <i>Shewanella sp.</i>                 | A1RLT8 | 57 | 2.10E-118 |
| VSAL_II0271    | 115  | transposase                                         | <i>Pseudoalteromonas haloplanktis</i> | Q3IIG1 | 58 | 1.40E-31  |
| VSAL_II0272*   | 104  | transposase                                         | <i>Pseudoalteromonas haloplanktis</i> | Q3IIG2 | 30 | 4.10E-06  |
| <b>GI-VSA4</b> |      |                                                     |                                       |        |    |           |
| VSAL_II0321    | 620  | putative glycosyl transferase                       | <i>Escherichia coli</i>               | P37653 | 27 | 1.90E-14  |

|              |     |                                                 |                                       |        |    |           |
|--------------|-----|-------------------------------------------------|---------------------------------------|--------|----|-----------|
| VSAI_II0322  | 439 | putative membrane protein                       | <i>Photobacterium profundum</i>       | Q1Z567 | 78 | 6.40E-150 |
| VSAI_II0323  | 467 | putative lipoprotein                            | <i>Photobacterium profundum</i>       | Q1Z566 | 86 | 2.70E-184 |
| VSAI_II0324  | 466 | putative lipoprotein                            | <i>Photobacterium profundum</i>       | Q1Z565 | 78 | 3.90E-164 |
| VSAI_II0325  | 323 | putative exported protein                       | <i>Photobacterium profundum</i>       | Q1Z564 | 37 | 4.60E-38  |
| VSAI_II0326  | 146 | hypothetical protein                            | <i>Photobacterium profundum</i>       | Q1Z571 | 50 | 2.70E-26  |
| VSAI_II0327  | 381 | putative nucleotidyl transferase                | <i>Photobacterium profundum</i>       | Q1Z572 | 70 | 2.70E-108 |
| VSAI_II0328  | 97  | putative anti-sigma F factor antagonist         | <i>Photobacterium profundum</i>       | Q1Z573 | 63 | 5.80E-22  |
| VSAI_II0329  | 415 | putative response regulator                     | <i>Photobacterium profundum</i>       | Q1Z574 | 64 | 3.50E-107 |
| VSAI_II0330  | 422 | hypothetical protein                            | <i>Photobacterium profundum</i>       | Q1Z563 | 66 | 7.40E-115 |
| VSAI_II0331  | 335 | putative exported protein                       | <i>Photobacterium profundum</i>       | Q1Z575 | 64 | 7.60E-97  |
| VSAI_II0332* | 181 | putative hemolysin-type calcium-binding protein | <i>Pasteurella haemolytica</i>        | P55123 | 36 | 5.50E-05  |
| VSAI_II0333  | 104 | transposase                                     | <i>Pseudoalteromonas haloplanktis</i> | Q3IIG2 | 30 | 4.10E-06  |
| VSAI_II0334  | 115 | transposase                                     | <i>Pseudoalteromonas haloplanktis</i> | Q3IIG1 | 58 | 1.40E-31  |
| VSAI_II0335  | 491 | transposase                                     | <i>Shewanella sp.</i>                 | A1RLT8 | 57 | 2.10E-118 |

#### GI-VSA5

|              |     |                                                   |                                             |        |    |          |
|--------------|-----|---------------------------------------------------|---------------------------------------------|--------|----|----------|
| VSAI_II0362  | 296 | hypothetical protein                              | <i>Aliivibrio fischeri</i>                  | A9I1Z7 | 61 | 3.00E-68 |
| VSAI_II0363  | 382 | putative response regulator                       | <i>Aliivibrio fischeri</i>                  | A9I1Z4 | 38 | 1.20E-45 |
| VSAI_II0364  | 75  | hypothetical protein                              | None                                        |        |    |          |
| VSAI_II0365  | 35  | hypothetical protein                              | None                                        |        |    |          |
| VSAI_II0366  | 69  | fimbrial protein, Flp/Fap pilin component Flp1    | <i>Actinobacillus actinomycesemcomitans</i> | O66149 | 32 | 4.00E-03 |
| VSAI_II0367  | 144 | type IV leader peptidase TadV                     | <i>Actinobacillus actinomycesemcomitans</i> | Q7X0M3 | 33 | 5.70E-07 |
| VSAI_II0368  | 260 | putative Flp pilus assembly protein CpaB          | <i>Aliivibrio fischeri</i>                  | Q5E107 | 60 | 1.50E-49 |
| VSAI_II0369  | 445 | type II/III secretion system protein RcpA         | <i>Actinobacillus actinomycesemcomitans</i> | Q7X0M1 | 36 | 7.20E-27 |
| VSAI_II0370  | 169 | putative lipoprotein                              | <i>Aliivibrio fischeri</i>                  | Q5E105 | 56 | 1.70E-36 |
| VSAI_II0371  | 405 | type II secretion system protein TadZ             | <i>Actinobacillus actinomycesemcomitans</i> | Q8GCZ9 | 25 | 2.00E-03 |
| VSAI_II0372  | 428 | type II secretion system protein TadA             | <i>Actinobacillus actinomycesemcomitans</i> | Q9XC06 | 53 | 1.30E-77 |
| VSAI_II0373  | 303 | type II secretion system protein TadB             | <i>Actinobacillus actinomycesemcomitans</i> | Q9XC05 | 37 | 5.30E-28 |
| VSAI_II0374  | 292 | type II secretion system protein TadC             | <i>Actinobacillus actinomycesemcomitans</i> | Q9S4A8 | 33 | 7.00E-23 |
| VSAI_II0375  | 247 | putative secretion system protein TadD            | <i>Actinobacillus actinomycesemcomitans</i> | Q9S4A7 | 30 | 7.10E-13 |
| VSAI_II0376  | 162 | membrane associated secretion system protein TadE | <i>Actinobacillus actinomycesemcomitans</i> | Q7X0L4 | 24 | 7.50E-01 |
| VSAI_II0377  | 179 | membrane associated secretion system protein TadF | <i>Actinobacillus actinomycesemcomitans</i> | Q9S4A5 | 31 | 7.20E-08 |
| VSAI_II0378  | 422 | membrane associated secretion system protein TadG | <i>Actinobacillus actinomycesemcomitans</i> | Q9S4A4 | 21 | 4.60E-04 |
| VSAI_II0379* | 212 | outer membrane protein, OmpA family               | <i>Aliivibrio fischeri</i>                  | Q5E7H8 | 36 | 1.10E-22 |
| VSAI_II0380  | 363 | membrane protein                                  | <i>Aliivibrio fischeri</i>                  | A8T8Z7 | 47 | 1.00E-58 |

#### GI-VSA6

|             |     |                      |      |  |  |  |
|-------------|-----|----------------------|------|--|--|--|
| VSAI_II0986 | 725 | hypothetical protein | None |  |  |  |
|-------------|-----|----------------------|------|--|--|--|

|              |     |                           |
|--------------|-----|---------------------------|
| VSAL_II0986  | 506 | hypothetical protein      |
| VSAL_II0986  | 225 | hypothetical protein      |
| VSAL_II0986* | 314 | putative exported protein |
| VSAL_II0986  | 397 | transposase               |

*None*

*None*

*Vibrio angustum*

*Pseudomonas syringae*

Q1ZM92

P24607

39 1.40E-28

46 1.20E-78

\*Indicate pseudogenes and gene remnants
