# Supplementary material for: The genome sequence of the fish pathogen Aliivibrio salmonicida strain LFI1238 shows extensive evidence of gene decay
Source: PubMed Central journal article supplement (PMC2627896; doi:10.1186/1471-2164-9-616), 2008-12-19

**Additional file 6. A:** The two duplicated region in *A. salmonicida*; **B:** Agarose gel electrophoresis of PCR products confirming the presence of the duplication in all tested *A. salmonicida* isolates.

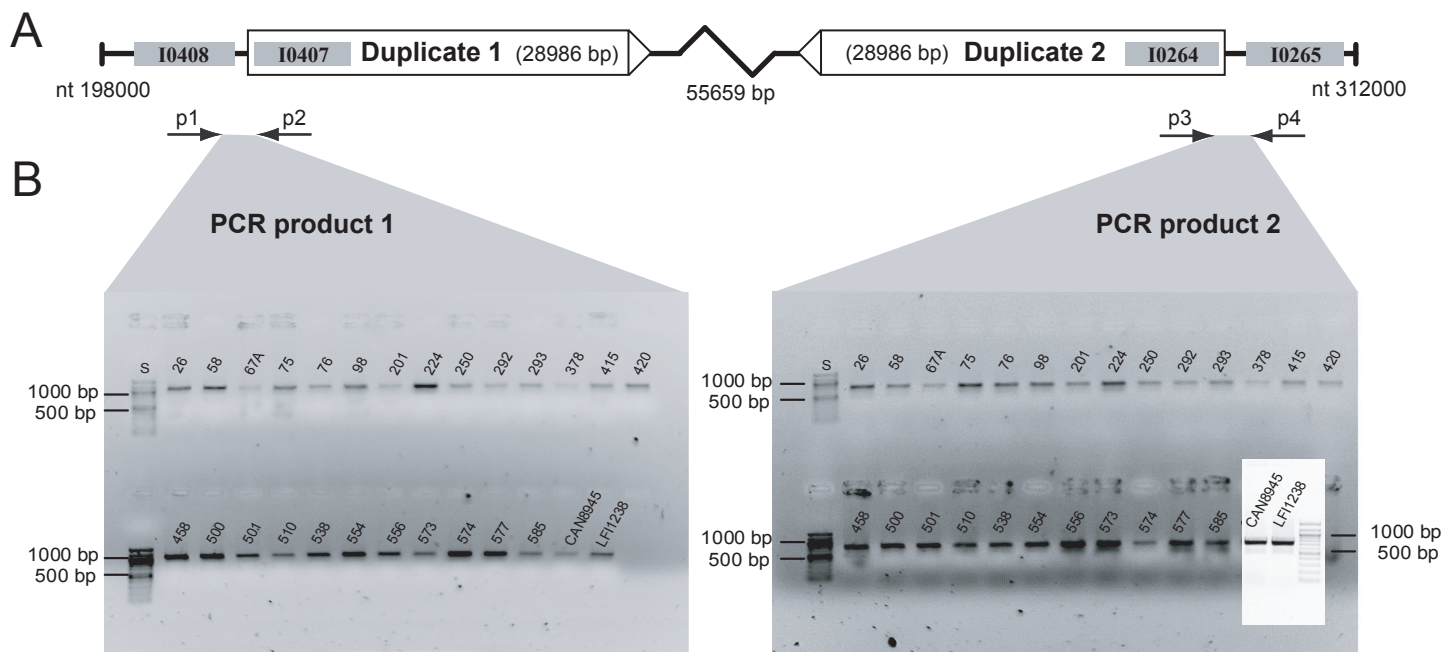

Supplement: 1471-2164-9-616-S7.pdf [file 1471-2164-9-616-S7.pdf]
