# Supplementary material for: The genome sequence of the fish pathogen Aliivibrio salmonicida strain LFI1238 shows extensive evidence of gene decay
Source: PubMed Central journal article supplement (PMC2627896; doi:10.1186/1471-2164-9-616), 2008-12-19
Supplement: 1471-2164-9-616-S8.pdf [file 1471-2164-9-616-S8.pdf]

**Additional file 8.** Functional and putative non-functional *A. salmonicida* genes involved in key steps of the chitinolytic cascade, together with orthologues from other sequenced *Vibrionaceae*.

| <i>A. salmonicida</i><br>LF11238 | Product                                                                          | <i>V. cholerae</i><br>N16961 | <i>V. parahaemolyticus</i><br>RIMD 2210633 | <i>V. vulnificus</i><br>YJ016 | <i>V. vulnificus</i><br>CMCP6 | <i>V. harveyi</i><br>ATCC BAA-1116           | <i>V. cholerae</i><br>O395 | <i>A. fischeri</i><br>ES114 |
|----------------------------------|----------------------------------------------------------------------------------|------------------------------|--------------------------------------------|-------------------------------|-------------------------------|----------------------------------------------|----------------------------|-----------------------------|
| <b>Sensing/attachment</b>        |                                                                                  |                              |                                            |                               |                               |                                              |                            |                             |
| VSAL_I2601 <sup>#</sup>          | Methyl-accepting chemotaxis protein <sup>1)</sup>                                | VC0449                       | VP2629                                     | VV2887                        | VV1_1511                      | VIBHAR_07022                                 | VC0395_A2871               | VF2161                      |
| VSAL_I10134                      | Chitin binding protein <sup>1)</sup>                                             | VCA0811*                     | VPA1598                                    | VVA0551                       | VV2_0044                      | VIBHAR_04739                                 | VC0395_0423                | VFA0143                     |
| <b>Extracellular degradation</b> |                                                                                  |                              |                                            |                               |                               |                                              |                            |                             |
| VSAL_I0757                       | Endochitinase <sup>2)</sup>                                                      | VC1952*                      | VP2338                                     | VV2578                        | VV1_1833                      | VIBHAR_03258<br>VIBHAR_00548<br>VIBHAR_05899 | VC0395_A1540               | VF0655                      |
| VSAL_I0902/I0763 <sup>#</sup>    | Chitinase A <sup>3)</sup>                                                        |                              |                                            |                               |                               |                                              |                            |                             |
| VSAL_I1942 <sup>#</sup>          | Chitinase A <sup>2)</sup>                                                        | VCA0027*                     | VPA0055                                    | VVA0044                       | VV2_1217                      | VIBHAR_06955                                 | VC0395_0106                | VF1598                      |
| VSAL_I1414 <sup>#</sup>          | Putative chitinase <sup>3)</sup>                                                 | VC0769*                      | VP0619                                     | VV0777                        | VV1_0417                      | VIBHAR_01081                                 | VC0395_A0298               | VF1390                      |
| VSAL_I10217                      | Chitinase B <sup>2)</sup>                                                        | VCA0140*                     | VPA0092                                    | VVA0086                       | VV2_1258                      | VIBHAR_02190                                 | VC0395_1137                | VFA0013                     |
| <b>Outer membrane transport</b>  |                                                                                  |                              |                                            |                               |                               |                                              |                            |                             |
| VSAL_I2352 <sup>#</sup>          | Chitoporin <sup>4)</sup>                                                         | VC0972*                      | VP0760                                     | VV0946                        | VV1_0238                      | VIBHAR_01269                                 | VC0395_A0493               | VF1889                      |
| <b>Periplasmic degradation</b>   |                                                                                  |                              |                                            |                               |                               |                                              |                            |                             |
| VSAL_I1108 <sup>#</sup>          | Chitodextrinase <sup>5)</sup>                                                    | VCA0700*                     | VPA0832                                    | VVA0720                       | VV2_0213                      | VIBHAR_05945                                 | VC0395_0638                | VF0986                      |
| VSAL_I2583                       | Beta-N-acetylglucosaminidase <sup>6)</sup>                                       | VC0613*                      | VP2486                                     | VV2741                        | VV1_1666                      | VIBHAR_03430                                 | VC0395_A0142               | VF2146                      |
| VSAL_I10050                      | N,N'-diacetylchitobiase <sup>7)</sup>                                            | VC2217*                      | VP0755                                     | VV0942                        | VV1_0241                      | VIBHAR_01265                                 | VC0395_A1809               | VFA1010                     |
| VSAL_I10575                      | Beta-N-acetylhexosaminidase <sup>6)</sup>                                        | VC0692                       | VP0545                                     | VV0700                        | VV1_0496                      | VIBHAR_00991                                 | VC0395_A0223               | VFA0493                     |
| <b>Inner membrane transport</b>  |                                                                                  |                              |                                            |                               |                               |                                              |                            |                             |
| VSAL_I0703                       | PTS system, cellobiose-specific IIC component <sup>1)</sup>                      | VC1282                       | VP2636                                     | VV2900                        | VV1_1483                      | VIBHAR_03624                                 | VC0395_A0901               | VF0603                      |
| VSAL_I0704                       | PTS system, cellobiose-specific IIB component <sup>1)</sup>                      | VC1281                       | VP2637                                     | VV2901                        | VV1_1482                      | VIBHAR_03625                                 | VC0395_A0900               | VF0604                      |
| VSAL_I0705                       | PTS system, 6-phospho-beta-glucosidase <sup>1)</sup>                             | VC1284                       | VP2634                                     | VV2898                        | VV1_1485                      | VIBHAR_03622                                 | VC0395_A0903               | VF0605                      |
| VSAL_I0706                       | PTS system, putative glucokinase                                                 |                              |                                            |                               |                               |                                              |                            | VF0606                      |
| VSAL_I0707                       | PTS system, cellobiose-specific IIA component <sup>1)</sup>                      | VC1283                       | VP2635                                     | VV2899                        | VV1_1484                      | VIBHAR_03623                                 | VC0395_A0902               | VF0607                      |
| VSAL_I0708                       | PTS system, transcriptional regulator <sup>1)</sup>                              | VC1286                       | VP2632                                     | VV2896                        | VV1_1487                      | VIBHAR_03620                                 | VC0395_A0905               | VF0608                      |
| VSAL_I0831                       | PTS system, N-acetylglucosamine and glucose permease <sup>6)</sup>               | VC0995                       | VP0831                                     | VV1012                        | VV1_0179                      | VIBHAR_01336                                 | VC0395_A0516               | VF0808                      |
| VSAL_I2577                       | ABC-type [(GlcNAc) <sub>2</sub> ] transporter, permease protein <sup>6)</sup>    | VC0619*                      | VP2480                                     | VV2735                        | VV1_1672                      | VIBHAR_03424                                 | VC0395_A0148               | VF2140                      |
| VSAL_I2578                       | ABC-type [(GlcNAc) <sub>2</sub> ] transporter, permease protein <sup>6)</sup>    | VC0618*                      | VP2481                                     | VV2736                        | VV1_1671                      | VIBHAR_03425                                 | VC0395_A0147               | VF2141                      |
| VSAL_I2579                       | ABC-type [(GlcNAc) <sub>2</sub> ] transporter, ATP-binding protein <sup>6)</sup> | VC0617*                      | VP2482                                     | VV2737                        | VV1_1670                      | VIBHAR_03426                                 | VC0395_A0146               | VF2142                      |
| VSAL_I2580                       | ABC-type [(GlcNAc) <sub>2</sub> ] transporter, ATP-binding protein <sup>6)</sup> | VC0616*                      | VP2483                                     | VV2738                        | VV1_1669                      | VIBHAR_03427                                 | VC0395_A0145               | VF2143                      |
| <b>Intracellular degradation</b> |                                                                                  |                              |                                            |                               |                               |                                              |                            |                             |
| VSAL_I0830                       | N-acetylglucosamine-6-phosphate deacetylase <sup>8)</sup>                        | VC0994                       | VP0829                                     | VV1011                        | VV1_0180                      | VIBHAR_01335                                 | VC0395_A0515               | VF0807                      |

|            |                                                 |         |         |         |          |              |              |        |
|------------|-------------------------------------------------|---------|---------|---------|----------|--------------|--------------|--------|
| VSAL_I2581 | Chitobiase (exoglucosidase) <sup>6)</sup>       | VC0615* | VP2484  | VV2739  | VV1_1668 | VIBHAR_03428 | VC0395_A0144 | VF2144 |
| VSAL_I2582 | Glucosamine kinase <sup>6)</sup>                | VC0614* | VP2485  | VV2740  | VV1_1667 | VIBHAR_03429 | VC0395_A0143 | VF2145 |
| VSAL_I2584 | Chitobiose phosphorylase <sup>6)</sup>          | VC0612* | VP2487  | VV2742  | VV1_1665 | VIBHAR_03431 | VC0395_A0141 | VF2147 |
| VSAL_I2585 | Phosphoglucomutase <sup>6)</sup>                | VC0611* | VP2488  | VV2743  | VV1_1664 | VIBHAR_03432 | VC0395_A0140 | VF2148 |
| VSAL_I2812 | Glucosamine-6-phosphate deaminase <sup>9)</sup> | VCA1025 | VPA0038 | VVA0028 | VV2_1200 | VIBHAR_07002 | VC0395_0216  | VF2357 |

**Regulation**

|                         |                                                        |         |        |        |          |              |              |        |
|-------------------------|--------------------------------------------------------|---------|--------|--------|----------|--------------|--------------|--------|
| VSAL_I2575              | Chitin degradation sensor protein <sup>6)</sup>        | VC0622  | VP2478 | VV2733 | VV1_1674 | VIBHAR_03422 | VC0395_A0150 | VF2138 |
| VSAL_I2576 <sup>#</sup> | [(GlcNAc) <sub>n</sub> ] binding protein <sup>6)</sup> | VC0620* | VP2479 | VV2734 | VV1_1673 | VIBHAR_03423 | VC0395_A0149 | VF2139 |

<sup>#</sup>Degenerated *A. salmonicida* genes; <sup>†</sup>ChiS regulated in *V. cholerae*; <sup>1)</sup>Meibom et al. 2003, <sup>2)</sup>Orikoshi et al. 2005; <sup>3)</sup>Svitvil and Kirchman 1998; <sup>4)</sup>Keyhani et al. 2000;

<sup>5)</sup>Keyhani and Roseman 1996b; <sup>6)</sup>Li and Roseman 2004; <sup>7)</sup>Soto-Gil and Zyskind 1989; <sup>8)</sup>Yamano et al. 1997 and <sup>9)</sup>Rogers et al. 1988
