# Supplementary material for: The genome sequence of the fish pathogen Aliivibrio salmonicida strain LFI1238 shows extensive evidence of gene decay
Source: PubMed Central journal article supplement (PMC2627896; doi:10.1186/1471-2164-9-616), 2008-12-19
Supplement: 1471-2164-9-616-S9.pdf [file 1471-2164-9-616-S9.pdf]

**Additional file 9.** Growth of different *Vibrionaceae* isolates on  $\alpha$ -chitin and GlcNAc

| Isolate               | $\alpha$ -chitin | GlcNAc |
|-----------------------|------------------|--------|
| <i>A. salmonicida</i> |                  |        |
| LF11238               | -                | -      |
| 88                    | -                | -      |
| 378                   | -                | -      |
| 224                   | -                | -      |
| 415                   | -                | -      |
| 67A                   | -                | -      |
| <i>A. wodanis</i>     |                  |        |
| ATCC BAA-104          | -                | (+)    |
| 04/17347              | -                | -      |
| 06/139A               | +                | +      |
| 02/569                | -                | +      |
| <i>V. splendidus</i>  |                  |        |
| ATCC 33125            | +                | +      |
| 03/122                | +                | +      |
| 02/066                | (+)              | -      |
| 00/860                | +                | +      |

+, growth; (+), weak growth; -, no growth  
*A. salmonicida* and *A. wodanis* grown at 12°C,  
*V. splendidus* grown at room temperature.
