# Supplementary material for: The genome sequence of the fish pathogen Aliivibrio salmonicida strain LFI1238 shows extensive evidence of gene decay
Source: PubMed Central journal article supplement (PMC2627896; doi:10.1186/1471-2164-9-616), 2008-12-19
Supplement: 1471-2164-9-616-S10.pdf [file 1471-2164-9-616-S10.pdf]

**Additional file 10.** Predicted coding sequences of *A. salmonicida* with potential roles in pathogenicity.

| Class                     | Putative function | <sup>1)</sup> Gene ID | Size | Predicted product                                               | <sup>3)</sup> Similar to   | Acc. No. | Identity (%) | E-value   | PubMed id |
|---------------------------|-------------------|-----------------------|------|-----------------------------------------------------------------|----------------------------|----------|--------------|-----------|-----------|
| <b>Adherence/motility</b> |                   |                       |      |                                                                 |                            |          |              |           |           |
| <b>Polar flagella</b>     |                   |                       |      |                                                                 |                            |          |              |           |           |
|                           |                   | VSAL_I0936            | 254  | Sodium-driven polar flagellar protein ( <i>motA</i> )           | <i>V. parahaemolyticus</i> | Q9Z6H0   | 79           | 7.40E-67  | 10850984  |
| ▼                         |                   | VSAL_I0937            | 309  | Sodium-driven polar flagellar protein ( <i>motB</i> )           | <i>V. parahaemolyticus</i> | Q9Z6G9   | 75           | 2.30E-86  | 10850984  |
|                           |                   | VSAL_I1863            | 292  | Sodium-driven polar flagellar protein ( <i>motY</i> )           | <i>V. parahaemolyticus</i> | P46233   | 66           | 1.50E-75  | 10850984  |
|                           |                   | VSAL_I2282            | 153  | Putative membrane protein                                       | <i>V. parahaemolyticus</i> | Q87MK7   | 49           | 8.20E-19  | No        |
| ▲                         |                   | VSAL_I2283            | 164  | Chemotaxis protein ( <i>cheW</i> )                              | <i>V. parahaemolyticus</i> | Q9LB08   | 88           | 5.60E-49  | 10850984  |
|                           |                   | VSAL_I2284            | 363  | CheW-like protein                                               | <i>V. parahaemolyticus</i> | Q87MK6   | 50           | 1.40E-56  | No        |
|                           |                   | VSAL_I2285            | 255  | Putative chromosome segregation protein                         | <i>V. parahaemolyticus</i> | Q9LB10   | 75           | 6.60E-68  | No        |
|                           |                   | VSAL_I2286            | 380  | Chemotaxis response regulator ( <i>cheB</i> )                   | <i>V. parahaemolyticus</i> | Q87MK5   | 78           | 4.30E-61  | 10850984  |
|                           |                   | VSAL_I2287            | 723  | Chemotaxis protein ( <i>cheA</i> )                              | <i>V. parahaemolyticus</i> | Q9LB12   | 72           | 1.20E-140 | 10850984  |
|                           |                   | VSAL_I2288            | 239  | Chemotaxis protein ( <i>cheZ</i> )                              | <i>V. parahaemolyticus</i> | Q9LB13   | 67           | 5.80E-51  | 10850984  |
|                           |                   | VSAL_I2289            | 130  | Chemotaxis protein ( <i>cheY</i> )                              | <i>V. parahaemolyticus</i> | Q9LB14   | 95           | 5.10E-40  | 10850984  |
|                           |                   | VSAL_I2290            | 243  | RNA polymerase sigma factor ( <i>fliA</i> )                     | <i>V. parahaemolyticus</i> | Q9LB15   | 72           | 7.50E-62  | 10850984  |
|                           |                   | VSAL_I2291            | 296  | Flagellar biosynthesis protein ( <i>fliH</i> )                  | <i>V. parahaemolyticus</i> | Q9LB16   | 78           | 2.30E-78  | 10850984  |
|                           |                   | VSAL_I2292            | 484  | Flagellar biosynthesis protein ( <i>fliF</i> )                  | <i>V. parahaemolyticus</i> | Q9LB17   | 64           | 1.60E-86  | 10850984  |
|                           |                   | VSAL_I2293            | 697  | Polar flagellar assembly protein ( <i>fliH</i> )                | <i>V. parahaemolyticus</i> | Q9Z6F4   | 83           | 5.90E-206 | 10850984  |
| ▲                         |                   | VSAL_I2295            | 376  | Polar flagellar assembly protein ( <i>fliB</i> )                | <i>V. parahaemolyticus</i> | Q9Z6F5   | 75           | 1.80E-103 | 10850984  |
|                           |                   | VSAL_I2296            | 260  | Polar flagellar assembly protein ( <i>fliR</i> )                | <i>V. parahaemolyticus</i> | Q9Z6F6   | 80           | 1.30E-67  | 10850984  |
|                           |                   | VSAL_I2297            | 89   | Polar flagellar assembly protein ( <i>fliQ</i> )                | <i>V. parahaemolyticus</i> | Q9Z6F7   | 85           | 1.70E-25  | 10850984  |
|                           |                   | VSAL_I2298            | 289  | Polar flagellar assembly protein ( <i>fliP</i> )                | <i>V. parahaemolyticus</i> | Q9Z6F8   | 73           | 3.60E-68  | 10850984  |
|                           |                   | VSAL_I2299            | 129  | Polar flagellar assembly protein ( <i>fliO</i> )                | <i>V. parahaemolyticus</i> | Q9Z6F9   | 58           | 6.50E-20  | 10850984  |
|                           |                   | VSAL_I2300            | 127  | Polar flagellar switch protein ( <i>fliN</i> )                  | <i>V. parahaemolyticus</i> | Q9Z6G0   | 78           | 1.30E-30  | 10850984  |
|                           |                   | VSAL_I2301            | 343  | Polar flagellar switch protein ( <i>fliM</i> )                  | <i>V. parahaemolyticus</i> | Q9Z6G1   | 85           | 9.10E-108 | 10850984  |
|                           |                   | VSAL_I2302            | 161  | Polar flagellar protein ( <i>fliL</i> )                         | <i>V. parahaemolyticus</i> | Q9Z6G2   | 56           | 1.70E-30  | 10850984  |
| ▲                         |                   | VSAL_I2303            | 407  | Polar flagellar hook-length control protein ( <i>fliK</i> )     | <i>V. parahaemolyticus</i> | Q9Z6G3   | 51           | 2.70E-22  | 10850984  |
|                           |                   | VSAL_I2304            | 145  | Polar flagellar assembly protein ( <i>fliJ</i> )                | <i>V. parahaemolyticus</i> | Q9Z6G4   | 65           | 4.20E-34  | 10850984  |
|                           |                   | VSAL_I2305            | 439  | Polar flagellum-specific ATP synthase ( <i>fliI</i> )           | <i>V. parahaemolyticus</i> | Q9Z6G5   | 86           | 2.60E-133 | 10850984  |
|                           |                   | VSAL_I2306            | 265  | Polar flagellar assembly protein ( <i>fliH</i> )                | <i>V. parahaemolyticus</i> | Q9Z6G6   | 52           | 2.50E-44  | 10850984  |
|                           |                   | VSAL_I2307            | 350  | Polar flagellar motor switch protein ( <i>fliG</i> )            | <i>V. parahaemolyticus</i> | Q9Z6G7   | 82           | 6.20E-98  | 10850984  |
|                           |                   | VSAL_I2308*           | 577  | Flagellar M-ring protein ( <i>fliF</i> )                        | <i>V. parahaemolyticus</i> | Q9Z6G8   | 70           | 3.10E-156 | 10850984  |
|                           |                   | VSAL_I2309            | 103  | Flagellar hook-basal body complex protein ( <i>fliE</i> )       | <i>V. parahaemolyticus</i> | Q9LB18   | 71           | 1.80E-24  | 10850984  |
| ▲                         |                   | VSAL_I2310            | 478  | Sigma-54 dependent response regulator ( <i>fliM</i> )           | <i>V. parahaemolyticus</i> | Q9LB19   | 80           | 1.00E-112 | 10850984  |
|                           |                   | VSAL_I2311            | 347  | Histidine kinase ( <i>fliA</i> )                                | <i>V. parahaemolyticus</i> | Q56709   | 78           | 2.50E-96  | 10850984  |
| ▲                         |                   | VSAL_I2312            | 493  | Polar flagellar protein ( <i>fliK</i> )                         | <i>V. parahaemolyticus</i> | Q56708   | 68           | 6.00E-128 | 10850984  |
|                           |                   | VSAL_I2313            | 138  | Polar flagellar protein ( <i>fliJ</i> )                         | <i>V. parahaemolyticus</i> | Q56707   | 84           | 1.50E-40  | 10850984  |
|                           |                   | VSAL_I2314            | 96   | Polar flagellar protein ( <i>fliI</i> )                         | <i>V. parahaemolyticus</i> | Q56706   | 27           | 9.40E-05  | 10850984  |
|                           |                   | VSAL_I2315            | 646  | Polar flagellar hook-associated protein 2 ( <i>fliDP/fliH</i> ) | <i>V. parahaemolyticus</i> | Q56705   | 45           | 3.40E-46  | 10850984  |
|                           |                   | VSAL_I2316*           | 138  | Polar flagellar protein ( <i>fliG</i> )                         | <i>V. parahaemolyticus</i> | Q56704   | 38           | 1.00E-08  | 10850984  |

|   |                    |     |                                                                     |                            |        |    |           |          |
|---|--------------------|-----|---------------------------------------------------------------------|----------------------------|--------|----|-----------|----------|
|   | VSAL_I2317         | 378 | Flagellin subunit E ( <i>flaE</i> )                                 | <i>A. fischeri</i>         | Q5E3N9 | 93 | 3.40E-111 | 15205434 |
|   | VSAL_I2318         | 375 | Flagellin subunit D ( <i>flaD</i> )                                 | <i>A. fischeri</i>         | Q6R4P9 | 93 | 8.10E-116 | 15205434 |
|   | VSAL_I2319         | 402 | Flagellin subunit C ( <i>flaC</i> )                                 | <i>A. fischeri</i>         | Q6R4Q0 | 94 | 1.00E-124 | 15205434 |
| ↑ | VSAL_I2325         | 377 | Flagellin subunit C ( <i>flaB</i> )                                 | <i>V. parahaemolyticus</i> | Q87081 | 68 | 2.80E-89  | 10850984 |
|   | VSAL_I2326         | 125 | Putative exported protein                                           | None                       |        |    |           |          |
|   | VSAL_I2327         | 379 | Flagellin subunit C ( <i>flaA</i> )                                 | <i>V. parahaemolyticus</i> | Q56712 | 70 | 4.30E-87  | 10850984 |
| ↑ | VSAL_I2328         | 397 | Flagellar hook-associated protein type 3 ( <i>flgL</i> )            | <i>V. parahaemolyticus</i> | Q56711 | 61 | 2.50E-87  | 10850984 |
|   | VSAL_I2329         | 626 | Flagellar hook-associated protein type 3 ( <i>flgM</i> )            | <i>V. parahaemolyticus</i> | Q87RK5 | 60 | 4.80E-102 | 10850984 |
|   | VSAL_I2330         | 332 | Peptidoglycan hydrolase ( <i>flgJ</i> )                             | <i>V. parahaemolyticus</i> | Q9X9J3 | 54 | 5.60E-38  | 10850984 |
| ↑ | VSAL_I2331         | 373 | Flagellar P-ring protein 2 precursor ( <i>flgI</i> )                | <i>V. parahaemolyticus</i> | Q9X9J4 | 84 | 2.20E-105 | 10850984 |
|   | VSAL_I2332         | 261 | Flagellar L-ring protein 1 precursor ( <i>flgH</i> )                | <i>V. parahaemolyticus</i> | Q9X9J5 | 72 | 6.00E-73  | 10850984 |
|   | VSAL_I2333         | 262 | Flagellar basal-body rod protein ( <i>flgG</i> )                    | <i>V. parahaemolyticus</i> | Q9X9J6 | 85 | 4.90E-83  | 10850984 |
|   | VSAL_I2334         | 241 | Flagellar basal-body rod protein ( <i>flgF</i> )                    | <i>V. parahaemolyticus</i> | Q9X9J7 | 78 | 1.10E-67  | 10850984 |
|   | VSAL_I2335         | 432 | Flagellar hook protein ( <i>flgE</i> )                              | <i>V. parahaemolyticus</i> | Q9X9J8 | 67 | 6.30E-115 | 10850984 |
| ↑ | VSAL_I2336         | 236 | Flagellar basal-body rod protein ( <i>flgD</i> )                    | <i>V. parahaemolyticus</i> | Q9X9J9 | 77 | 1.20E-65  | 10850984 |
|   | VSAL_I2337         | 138 | Flagellar basal-body rod protein ( <i>flgC</i> )                    | <i>V. parahaemolyticus</i> | Q9X9K0 | 84 | 2.80E-40  | 10850984 |
|   | VSAL_I2338         | 131 | Flagellar basal-body rod protein ( <i>flgB</i> )                    | <i>V. parahaemolyticus</i> | Q9X9K1 | 79 | 4.10E-39  | 10850984 |
| ↑ | VSAL_I2339         | 275 | Chemotaxis protein ( <i>cheR</i> )                                  | <i>V. parahaemolyticus</i> | Q9X9K2 | 84 | 8.60E-91  | 10850984 |
|   | VSAL_I2340         | 306 | Chemotaxis protein ( <i>cheV</i> )                                  | <i>V. parahaemolyticus</i> | Q9X9K3 | 81 | 2.50E-79  | 10850984 |
|   | VSAL_I2341         | 248 | Polar flagellar basal-body P-ring formation protein ( <i>flgA</i> ) | <i>V. parahaemolyticus</i> | Q9X9K4 | 43 | 5.40E-40  | 10850984 |
|   | VSAL_I2342         | 103 | Regulator of flagellin synthesis ( <i>flgM</i> )                    | <i>V. parahaemolyticus</i> | Q9X9K5 | 51 | 9.40E-15  | 10850984 |
| ↓ | VSAL_I2343         | 142 | Polar flagellar ( <i>flgN</i> )                                     | <i>V. parahaemolyticus</i> | Q87RK8 | 53 | 8.40E-22  | 10850984 |
|   | VSAL_I2517         | 385 | Flagellin subunit D ( <i>flaF</i> )                                 | <i>A. fischeri</i>         | Q5E322 | 91 | 2.30E-113 | No       |
|   | VSAL_I2771         | 210 | Sodium-driven polar flagellar protein ( <i>motX</i> )               | <i>V. parahaemolyticus</i> | P40608 | 75 | 1.40E-60  | 10850984 |
|   | VSAL_I2897         | 136 | Putative flagellar basal body-associated protein ( <i>fliL</i> )    | <i>A. fischeri</i>         | Q5E205 | 86 | 8.60E-48  | No       |
|   | <b>VSAL_II0231</b> | 313 | Chemotaxis protein ( <i>cheV</i> )                                  | <i>A. hydrophila</i>       | Q8GLQ0 | 52 | 4.20E-51  | 12732473 |

### Chemotaxis

|  |                    |     |                                                                 |                      |        |    |           |         |
|--|--------------------|-----|-----------------------------------------------------------------|----------------------|--------|----|-----------|---------|
|  | VSAL_I0799         | 624 | Methyl-accepting chemotaxis protein                             | <i>A. fischeri</i>   | Q5E6S4 | 92 | 1.80E-196 | No      |
|  | VSAL_I0920         | 662 | Nitrate and nitrite sensing methyl-accepting chemotaxis protein | <i>P. aeruginosa</i> | Q9HW91 | 25 | 1.10E-25  | No      |
|  | VSAL_I1294         | 663 | Methyl-accepting chemotaxis protein                             | <i>A. fischeri</i>   | Q5E5R8 | 86 | 4.10E-186 | No      |
|  | VSAL_I1636         | 547 | Methyl-accepting chemotaxis protein                             | <i>V. cholerae</i>   | P29486 | 34 | 1.10E-28  | 8005659 |
|  | VSAL_I1951         | 720 | Methyl-accepting chemotaxis protein                             | <i>P. profundum</i>  | Q1Z156 | 48 | 4.00E-116 | No      |
|  | VSAL_I2075         | 362 | Methyl-accepting chemotaxis protein                             | <i>A. fischeri</i>   | Q5E6H9 | 85 | 6.10E-102 | No      |
|  | VSAL_I2130         | 546 | Methyl-accepting chemotaxis protein                             | <i>P. aeruginosa</i> | O32443 | 39 | 1.00E-36  | 9353923 |
|  | VSAL_I2193         | 697 | Methyl-accepting chemotaxis protein                             | <i>A. fischeri</i>   | Q5E3W2 | 82 | 1.50E-199 | No      |
|  | VSAL_I2678         | 533 | Methyl-accepting chemotaxis protein                             | <i>A. fischeri</i>   | Q5E2L5 | 83 | 2.80E-144 | No      |
|  | <b>VSAL_II0170</b> | 543 | Methyl-accepting chemotaxis protein                             | <i>V. cholerae</i>   | P29486 | 37 | 1.30E-31  | 8005659 |
|  | <b>VSAL_II0498</b> | 302 | Chemotaxis protein, CheW-like                                   | <i>A. fischeri</i>   | Q5DZM8 | 89 | 4.90E-89  | No      |
|  | <b>VSAL_II0675</b> | 542 | Methyl-accepting chemotaxis protein                             | <i>A. fischeri</i>   | Q5E095 | 81 | 1.20E-144 | No      |
|  | <b>VSAL_II0712</b> | 546 | Methyl-accepting chemotaxis protein                             | <i>A. fischeri</i>   | Q5E0C8 | 77 | 5.50E-130 | No      |
|  | <b>VSAL_II0756</b> | 558 | Methyl-accepting chemotaxis protein                             | <i>A. fischeri</i>   | Q5E0Q1 | 89 | 6.20E-165 | No      |
|  | <b>VSAL_II0771</b> | 661 | Methyl-accepting chemotaxis protein                             | <i>A. fischeri</i>   | Q5E0S6 | 78 | 4.40E-163 | No      |
|  | <b>VSAL_II1022</b> | 628 | Methyl-accepting chemotaxis protein                             | <i>V. vulnificus</i> | Q7MDS3 | 77 | 1.00E-163 | No      |

### MSHA Type IV pilus

|             |      |                                                                  |                    |        |    |           |         |
|-------------|------|------------------------------------------------------------------|--------------------|--------|----|-----------|---------|
| VSAL_I0466  | 487  | Type IV pilus, mannose-sensitive hemagglutinin D ( <i>mshI</i> ) | <i>V. cholerae</i> | Q56670 | 39 | 6.50E-52  | 9973335 |
| VSAL_I0467  | 212  | Type IV pilus, mannose-sensitive hemagglutinin D ( <i>mshJ</i> ) | <i>V. cholerae</i> | Q56671 | 43 | 4.70E-30  | 9973335 |
| VSAL_I0468  | 113  | Type IV pilus, mannose-sensitive hemagglutinin D ( <i>mshK</i> ) | <i>V. cholerae</i> | Q56672 | 39 | 2.20E-07  | 9973335 |
| VSAL_I0469  | 546  | Type IV pilus, mannose-sensitive hemagglutinin D ( <i>mshD</i> ) | <i>V. cholerae</i> | Q56673 | 66 | 7.10E-37  | 9973335 |
| VSAL_I0470  | 282  | Type IV pilus, mannose-sensitive hemagglutinin D ( <i>mshM</i> ) | <i>V. cholerae</i> | Q56674 | 59 | 2.30E-57  | 9973335 |
| VSAL_I0471  | 357  | Type IV pilus, mannose-sensitive hemagglutinin D ( <i>mshN</i> ) | <i>V. cholerae</i> | Q56675 | 36 | 4.20E-27  | 9973335 |
| VSAL_I0472* | 576  | Type IV pilus, mannose-sensitive hemagglutinin E ( <i>mshE</i> ) | <i>V. cholerae</i> | Q56676 | 77 | 4.10E-142 | 9973335 |
| VSAL_I0473  | 408  | Type IV pilus, mannose-sensitive hemagglutinin ( <i>mshG</i> )   | <i>V. cholerae</i> | Q56612 | 68 | 5.40E-94  | 9973335 |
| VSAL_I0474  | 150  | Type IV pilus, mannose-sensitive hemagglutinin ( <i>mshF</i> )   | <i>V. cholerae</i> | Q56650 | 29 | 4.50E-08  | 9973335 |
| VSAL_I0475  | 189  | Type IV pilus, mannose-sensitive hemagglutinin ( <i>mshB</i> )   | <i>V. cholerae</i> | Q60073 | 55 | 1.20E-30  | 9973335 |
| VSAL_I0476  | 157  | Type IV pilus, mannose-sensitive hemagglutinin ( <i>mshA</i> )   | <i>V. cholerae</i> | Q6BEA1 | 56 | 1.70E-26  | 9973335 |
| VSAL_I0477  | 156  | Type IV pilus, mannose-sensitive hemagglutinin ( <i>mshA</i> )   | <i>V. cholerae</i> | Q6BEA1 | 60 | 9.50E-25  | 9973335 |
| VSAL_I0478  | 204  | Type IV pilus, mannose-sensitive hemagglutinin ( <i>mshC</i> )   | <i>V. cholerae</i> | Q56651 | 35 | 1.20E-03  | 9973335 |
| VSAL_I0479  | 197  | Type IV pilus, mannose-sensitive hemagglutinin ( <i>mshD</i> )   | <i>V. cholerae</i> | Q79AF3 | 37 | 9.40E-08  | 9973335 |
| VSAL_I0480  | 251  | Exported protein, putative type IV prepilin ( <i>mshO</i> )      | <i>V. cholerae</i> | Q9ZA95 | 29 | 2.00E-14  | 9973335 |
| VSAL_I0481  | 144  | Exported protein ( <i>mshP</i> )                                 | <i>V. cholerae</i> | Q9ZA94 | 29 | 1.70E-02  | 9973335 |
| VSAL_I0482* | 1430 | Hypothetical protein ( <i>mshQ</i> )                             | <i>V. cholerae</i> | Q9ZA93 | 22 | 1.00E-07  | 9973335 |

### Type IV pilus assembly proteins

|             |     |                                                              |                      |        |    |           |                      |
|-------------|-----|--------------------------------------------------------------|----------------------|--------|----|-----------|----------------------|
| VSAL_I0544  | 345 | Type II/IV secretion system protein ( <i>pilT</i> )          | <i>P. aeruginosa</i> | P24559 | 68 | 1.10E-77  | 1676385              |
| VSAL_I0545  | 368 | Type II/IV secretion system protein ( <i>pilU</i> )          | <i>P. aeruginosa</i> | Q51532 | 58 | 9.80E-70  | 7854122              |
| VSAL_I0671  | 143 | Putative type IV fimbrial biogenesis protein ( <i>pilE</i> ) | <i>P. aeruginosa</i> | Q60148 | 32 | 4.60E-08  | 7854130              |
| VSAL_I0727  | 296 | Putative type IV fimbrial biogenesis protein ( <i>pilF</i> ) | <i>P. aeruginosa</i> | Q51526 | 35 | 8.70E-17  | 8973346              |
| VSAL_I2629  | 138 | Type IV pilus subunit ( <i>pilA</i> )                        | <i>V. cholerae</i>   | Q9X4G7 | 41 | 8.40E-10  | 10024587and 15731039 |
| VSAL_I2630  | 563 | Type IV pilin assembly protein ( <i>pilB</i> )               | <i>V. cholerae</i>   | Q9X4G8 | 68 | 9.00E-130 | 10024587and 15731039 |
| VSAL_I2631* | 412 | Type IV pilin assembly protein ( <i>pilC</i> )               | <i>V. cholerae</i>   | Q9X4G9 | 66 | 3.00E-97  | 10024587and 15731039 |
| VSAL_I2632  | 295 | Type IV prepilin peptidase ( <i>pilD</i> )                   | <i>V. cholerae</i>   | O68839 | 65 | 3.20E-70  | 10024587and 15731039 |
| VSAL_I2716  | 332 | Fimbrial assembly protein ( <i>pilM</i> )                    | <i>P. aeruginosa</i> | Q51351 | 22 | 6.60E-08  | 7565110              |
| VSAL_I2717  | 189 | Fimbrial assembly protein ( <i>pilN</i> )                    | <i>P. aeruginosa</i> | Q51352 | 27 | 1.00E-09  | 7565110              |
| VSAL_I2718  | 193 | Fimbrial assembly protein ( <i>pilO</i> )                    | <i>P. aeruginosa</i> | Q51353 | 34 | 1.80E-15  | 7565110              |
| VSAL_I2719  | 172 | Fimbrial assembly protein ( <i>pilP</i> )                    | <i>P. aeruginosa</i> | Q51354 | 27 | 9.40E-07  | 7565110              |
| VSAL_I2720* | 573 | Fimbrial assembly protein ( <i>pilQ</i> )                    | <i>P. aeruginosa</i> | P34750 | 40 | 4.80E-36  | 7565110              |

### F-pilus assembly protein

|              |     |                                                       |                      |        |    |          |         |
|--------------|-----|-------------------------------------------------------|----------------------|--------|----|----------|---------|
| VSAL_p840_01 | 56  | Conjugative transfer protein ( <i>traY</i> )          | <i>E. coli</i>       | P05835 | 54 | 1.20E-03 | 2836369 |
| VSAL_p840_02 | 93  | Conjugative transfer protein ( <i>traA</i> )          | <i>E. coli</i>       | P14496 | 36 | 1.10E-01 | 6090426 |
| VSAL_p840_03 | 100 | Conjugative transfer protein ( <i>traL</i> )          | <i>E. coli</i>       | P08321 | 24 | 4.40E+00 | 8655498 |
| VSAL_p840_04 | 186 | Conjugative transfer protein ( <i>traE</i> )          | <i>E. coli</i>       | Q46998 | 30 | 4.60E-07 | 8655498 |
| VSAL_p840_05 | 251 | Conjugative transfer protein ( <i>traK</i> )          | <i>E. coli</i>       | Q47003 | 23 | 2.80E-04 | 8655498 |
| VSAL_p840_06 | 476 | Conjugative transfer protein ( <i>traB</i> )          | <i>E. coli</i>       | P41067 | 29 | 1.30E-23 | 8655498 |
| VSAL_p840_07 | 133 | Putative conjugative transfer protein ( <i>traV</i> ) | <i>V. vulnificus</i> | Q8D6A0 | 53 | 9.00E-25 | No      |
| VSAL_p840_08 | 843 | Conjugative transfer protein ( <i>traC</i> )          | <i>E. coli</i>       | P18004 | 30 | 3.40E-62 | 2265751 |
| VSAL_p840_09 | 115 | Conjugative transfer protein ( <i>trbI</i> )          | <i>E. coli</i>       | P18006 | 33 | 1.20E-05 | 1355084 |
| VSAL_p840_10 | 218 | Conjugative transfer protein ( <i>traW</i> )          | <i>E. coli</i>       | P18472 | 35 | 3.30E-07 | 1355084 |
| VSAL_p840_11 | 334 | Conjugative transfer protein ( <i>traU</i> )          | <i>E. coli</i>       | P18471 | 49 | 2.60E-77 | 2198250 |

|             |              |     |                                                       |                      |        |    |          |         |
|-------------|--------------|-----|-------------------------------------------------------|----------------------|--------|----|----------|---------|
| pVS840<br>↓ | VSAL_p840_12 | 255 | Putative conjugative transfer protein ( <i>trbC</i> ) | <i>E. coli</i>       | P18473 | 23 | 1.10E-01 | 2050638 |
|             | VSAL_p840_13 | 572 | Conjugative transfer protein ( <i>traN</i> )          | <i>E. coli</i>       | P24082 | 42 | 3.40E-43 | 1593622 |
|             | VSAL_p840_14 | 247 | Conjugative transfer protein ( <i>traF</i> )          | <i>E. coli</i>       | P14497 | 30 | 1.40E-17 | 3042757 |
|             | VSAL_p840_15 | 255 | Putative membrane protein                             | None                 |        |    |          |         |
|             | VSAL_p840_16 | 141 | Conjugative transfer protein ( <i>trbB</i> )          | <i>E. coli</i>       | P18035 | 37 | 6.20E-10 | 2536655 |
|             | VSAL_p840_17 | 461 | Conjugative transfer protein ( <i>traH</i> )          | <i>E. coli</i>       | P15069 | 34 | 7.10E-50 | 2656408 |
|             | VSAL_p840_18 | 931 | Conjugative transfer protein ( <i>traG</i> )          | <i>E. coli</i>       | P33790 | 26 | 2.80E-50 | 1348105 |
|             | VSAL_p840_19 | 165 | Putative exported protein                             | <i>V. vulnificus</i> | Q7MBM2 | 27 | 4.10E-03 | No      |
|             | VSAL_p840_20 | 692 | Conjugative transfer protein ( <i>traD</i> )          | <i>E. coli</i>       | P09130 | 36 | 4.80E-76 | 2680768 |

#### Other

|              |     |                                                         |                         |        |    |          |          |
|--------------|-----|---------------------------------------------------------|-------------------------|--------|----|----------|----------|
| VSAL_I1141   | 163 | V10 pilin                                               | <i>V. cholerae</i>      | Q93RE5 | 42 | 1.70E-15 | 11497216 |
| VSAL_I2294   | 224 | Putative type IV pilus assembly protein PilZ            | <i>S. frigidimarina</i> | Q07YX2 | 32 | 1.90E-17 | No       |
| VSAL_I2444   | 209 | Accessory colonization factor precursor ( <i>acfA</i> ) | <i>V. cholerae</i>      | Q57345 | 35 | 1.70E-20 | 7737517  |
| VSAL_p840_23 | 145 | Transglycosylase ( <i>pilT</i> )                        | <i>E. coli</i>          | Q93D61 | 44 | 1.70E-21 | 12011003 |

#### LPS and cell capsule

##### Lipopolysaccharide biosynthesis

|   |            |     |                                                                            |                    |        |    |           |          |
|---|------------|-----|----------------------------------------------------------------------------|--------------------|--------|----|-----------|----------|
| ↓ | VSAL_I0159 | 313 | ADP-L-glycero-D-manno-heptose-6-epimerase ( <i>rfaD</i> )                  | <i>E. coli</i>     | P67910 | 74 | 4.50E-84  | 2198271  |
|   | VSAL_I0160 | 411 | O-antigen ligase ( <i>rfaL</i> )                                           | <i>E. coli</i>     | P27243 | 24 | 2.30E-02  | 1624462  |
|   | VSAL_I0161 | 356 | ADP-heptose-LPS heptosyltransferase II ( <i>rfaF</i> )                     | <i>E. coli</i>     | P37692 | 52 | 3.70E-68  | 1624462  |
|   | VSAL_I0162 | 420 | 3-deoxy-D-manno-octulosonic-acid transferase ( <i>kdtA</i> )               | <i>E. coli</i>     | P0AC75 | 41 | 6.50E-60  | 2033061  |
|   | VSAL_I0183 | 356 | Glycosyl transferase ( <i>waaC</i> )                                       | <i>V. cholerae</i> | Q9KVC1 | 49 | 9.20E-67  | 15469898 |
|   | VSAL_I0184 | 260 | Glycosyl transferase ( <i>wavB</i> )                                       | <i>V. cholerae</i> | Q9KVC2 | 60 | 3.80E-58  | 15469898 |
|   | VSAL_I0185 | 343 | Glycosyl transferase                                                       | <i>R. meliloti</i> | Q9R9N0 | 26 | 1.40E-10  | 15469898 |
|   | VSAL_I0186 | 162 | Phosphopantetheine adenylyltransferase ( <i>kdtB</i> )                     | <i>E. coli</i>     | P0A616 | 58 | 1.20E-31  | 2033061  |
|   | VSAL_I0238 | 343 | Glycosyl transferase                                                       | <i>R. meliloti</i> | Q9R9N0 | 26 | 1.40E-10  | 15469898 |
|   | VSAL_I0239 | 260 | Glycosyl transferase ( <i>wavB</i> )                                       | <i>V. cholerae</i> | Q9KVC2 | 44 | 1.10E-38  | 15469898 |
| ↑ | VSAL_I0240 | 356 | Glycosyl transferase ( <i>waaC</i> )                                       | <i>V. cholerae</i> | Q9KVC1 | 49 | 9.20E-67  | 15469898 |
|   | VSAL_I0261 | 420 | 3-deoxy-D-manno-octulosonic-acid transferase ( <i>kdtA</i> )               | <i>E. coli</i>     | P0AC75 | 41 | 6.50E-60  | 2033061  |
|   | VSAL_I0262 | 356 | ADP-heptose-LPS heptosyltransferase II ( <i>rfaF</i> )                     | <i>E. coli</i>     | P37692 | 52 | 3.70E-68  | 1624462  |
|   | VSAL_I0263 | 411 | O-antigen ligase ( <i>rfaL</i> )                                           | <i>E. coli</i>     | P27243 | 24 | 2.30E-02  | 1624462  |
|   | VSAL_I0264 | 313 | ADP-L-glycero-D-manno-heptose-6-epimerase ( <i>rfaD</i> )                  | <i>E. coli</i>     | P67910 | 74 | 4.50E-84  | 2198271  |
|   | VSAL_I0502 | 185 | 3-deoxy-d-manno-octulosonate 8-phosphate phosphatase ( <i>kdsC</i> )       | <i>E. coli</i>     | P0ABZ4 | 61 | 4.30E-38  | 12805358 |
|   | VSAL_I0503 | 324 | Arabinose 5-phosphate isomerase ( <i>kdsD</i> )                            | <i>E. coli</i>     | P45395 | 62 | 2.40E-66  | 12805358 |
|   | VSAL_I0794 | 284 | 2-dehydro-3-deoxyphosphooctonate aldolase ( <i>kdsA</i> )                  | <i>E. coli</i>     | P0A715 | 79 | 1.00E-84  | 3039295  |
|   | VSAL_I0826 | 165 | Transcriptional activator ( <i>rfaH</i> )                                  | <i>E. coli</i>     | P0AFW0 | 50 | 1.20E-24  | 1584020  |
|   | VSAL_I0885 | 183 | D,D-heptose 1,7-bisphosphate phosphatase ( <i>gmhB</i> )                   | <i>V. cholerae</i> | Q9KTJ4 | 71 | 1.30E-50  | 12101286 |
| ↑ | VSAL_I2175 | 313 | Lipid A biosynthesis acyltransferase ( <i>msbB</i> )                       | <i>E. coli</i>     | P24205 | 38 | 1.60E-46  | 9099672  |
|   | VSAL_I2414 | 383 | Lipid-A-disaccharide synthase ( <i>lpxB</i> )                              | <i>E. coli</i>     | P10441 | 58 | 1.10E-81  | 2824445  |
|   | VSAL_I2415 | 262 | UDP-N-acetylglucosamine acyltransferase ( <i>lpxA</i> )                    | <i>E. coli</i>     | P0A722 | 58 | 3.00E-56  | 3277952  |
|   | VSAL_I2416 | 159 | (3R)-hydroxymyristoyl-[acyl-carrier-protein] dehydratase ( <i>fabZ</i> )   | <i>E. coli</i>     | P0A6Q6 | 67 | 2.30E-36  | 7806516  |
|   | VSAL_I2417 | 339 | UDP-3-O-[3-hydroxymyristoyl] glucosamine N-acyltransferase ( <i>lpxD</i> ) | <i>E. coli</i>     | P21645 | 62 | 8.30E-74  | 8366125  |
|   | VSAL_I2418 | 171 | Outer membrane protein                                                     | <i>Y. pestis</i>   | P58607 | 39 | 2.00E-16  | No       |
|   | VSAL_I2419 | 806 | Outer membrane protein assembly factor                                     | <i>E. coli</i>     | P0A940 | 56 | 2.70E-167 | 15951436 |

|                    |     |                                                                              |                    |        |    |           |          |
|--------------------|-----|------------------------------------------------------------------------------|--------------------|--------|----|-----------|----------|
| VSAL_I2639         | 305 | UDP-3-O-[3-hydroxymyristoyl] N-acetylglucosamine deacetylase ( <i>lpxC</i> ) | <i>E. coli</i>     | P0A725 | 77 | 2.00E-91  | 8530464  |
| VSAL_I2676         | 476 | Bifunctional protein ( <i>hldE</i> )                                         | <i>E. coli</i>     | P76658 | 67 | 1.40E-112 | 10629197 |
| VSAL_I2894         | 807 | Glycerol-3-phosphate acyltransferase ( <i>plsB</i> )                         | <i>E. coli</i>     | P0A7A7 | 58 | 1.10E-180 | 9515909  |
| <b>VSAL_I10518</b> | 318 | Lipid A biosynthesis lauroyl acyltransferase ( <i>htrB</i> )                 | <i>E. coli</i>     | P0ACV0 | 45 | 1.40E-47  | 2203778  |
| <b>VSAL_I10732</b> | 249 | 3-deoxy-manno-octulosonate cytidyltransferase ( <i>kdsB</i> )                | <i>E. coli</i>     | P04951 | 65 | 3.40E-50  | 7543480  |
| <b>VSAL_I10733</b> | 56  | Hypothetical protein                                                         | <i>A. fischeri</i> | Q5E0F0 | 96 | 1.00E-18  | No       |
| <b>VSAL_I10734</b> | 335 | Tetraacyldisaccharide 4'-kinase ( <i>lpxK</i> )                              | <i>E. coli</i>     | P27300 | 55 | 1.60E-57  | 9575203  |
| <b>VSAL_I10735</b> | 768 | Lipid A export ATP-binding/permease protein ( <i>msbA</i> )                  | <i>E. coli</i>     | P60752 | 63 | 6.70E-115 | 8094880  |

### Exopolysaccharide biosynthesis

|             |     |                                                                              |                      |        |    |           |          |
|-------------|-----|------------------------------------------------------------------------------|----------------------|--------|----|-----------|----------|
| VSAL_I0165  | 367 | Putative pseudaminic acid biosynthesis protein                               | <i>C. jejuni</i>     | Q939J7 | 36 | 6.60E-39  | 16573682 |
| VSAL_I0166* | 230 | Putative acylneuraminase cytidyltransferase                                  | <i>E. coli</i>       | Q93NQ1 | 42 | 3.80E-21  | 11404020 |
| VSAL_I0167  | 352 | Nucleotidyl transferase ( <i>ptmE</i> )                                      | <i>C. coli</i>       | Q7X521 | 43 | 5.90E-31  | 8825781  |
| VSAL_I0168  | 214 | Putative acetyltransferase                                                   | <i>A. fischeri</i>   | Q5E8K7 | 89 | 6.80E-65  | No       |
| VSAL_I0169  | 357 | N-acetylneuraminic acid synthase ( <i>ptmC</i> )                             | <i>C. coli</i>       | Q7X523 | 52 | 4.50E-31  | 8825781  |
| VSAL_I0170  | 394 | UDP-N-acetylglucosamine 2-epimerase ( <i>ptmD</i> )                          | <i>C. coli</i>       | Q7X522 | 42 | 1.70E-50  | 8825781  |
| VSAL_I0171  | 381 | Aminotransferase                                                             | <i>P. aeruginosa</i> | Q8KNA4 | 60 | 1.60E-91  | 12057956 |
| VSAL_I0172  | 396 | Polysaccharide biosynthesis protein                                          | <i>V. cholerae</i>   | O05349 | 27 | 7.20E-15  | 9079898  |
| VSAL_I0173  | 373 | Hypothetical protein                                                         | <i>V. vulnificus</i> | Q7MPQ6 | 44 | 9.00E-57  | No       |
| VSAL_I0174  | 380 | Lipopolysaccharide biosynthesis protein ( <i>wavR</i> )                      | <i>V. cholerae</i>   | Q8RTH1 | 65 | 3.20E-98  | 15469898 |
| VSAL_I0176  | 279 | Putative glycosyl transferase                                                | <i>V. cholerae</i>   | Q8RTH7 | 48 | 1.30E-43  | 11953379 |
| VSAL_I0177  | 185 | dTDP-6-deoxy-D-xylo-4-hexulose-3,5-epimerase ( <i>rmIC</i> )                 | <i>V. cholerae</i>   | Q842R9 | 81 | 1.00E-56  | 12949172 |
| VSAL_I0178  | 296 | dTDP-6-deoxy-l-mannose-dehydrogenase ( <i>rmID</i> )                         | <i>V. cholerae</i>   | Q842N3 | 58 | 2.30E-59  | 12949172 |
| VSAL_I0179  | 294 | Glucose-1-phosphate thymidyl transferase ( <i>rmIA</i> )                     | <i>V. cholerae</i>   | Q842Q4 | 84 | 9.30E-96  | 12949172 |
| VSAL_I0180  | 363 | dTDP-glucose 4,6-dehydratase ( <i>rmIB</i> )                                 | <i>V. cholerae</i>   | Q842R1 | 84 | 1.30E-119 | 12949172 |
| VSAL_I0181  | 617 | Membrane associated sulfatase                                                | <i>A. fischeri</i>   | Q5E8L4 | 88 | 2.10E-195 | No       |
| VSAL_I0182  | 234 | Lipopolysaccharide core oligosaccharide biosynthesis protein ( <i>wavC</i> ) | <i>V. cholerae</i>   | Q8RJM8 | 66 | 2.00E-69  | 11953379 |
| VSAL_I0241  | 234 | Lipopolysaccharide core oligosaccharide biosynthesis protein ( <i>wavC</i> ) | <i>V. cholerae</i>   | Q8RJM8 | 66 | 2.00E-69  | 11953379 |
| VSAL_I0242  | 617 | Membrane associated sulfatase                                                | <i>A. fischeri</i>   | Q5E8L4 | 88 | 2.10E-195 | No       |
| VSAL_I0243  | 363 | dTDP-glucose 4,6-dehydratase ( <i>rmIB</i> )                                 | <i>V. cholerae</i>   | Q842R1 | 84 | 1.30E-119 | 12949172 |
| VSAL_I0244  | 294 | Glucose-1-phosphate thymidyl transferase ( <i>rmIA</i> )                     | <i>V. cholerae</i>   | Q842Q4 | 84 | 9.30E-96  | 12949172 |
| VSAL_I0245* | 296 | dTDP-6-deoxy-l-mannose-dehydrogenase ( <i>rmID</i> )                         | <i>V. cholerae</i>   | Q842N3 | 58 | 2.30E-59  | 12949172 |
| VSAL_I0246  | 185 | dTDP-6-deoxy-D-xylo-4-hexulose-3,5-epimerase ( <i>rmIC</i> )                 | <i>V. cholerae</i>   | Q842R9 | 81 | 1.00E-56  | 12949172 |
| VSAL_I0247  | 279 | Putative glycosyl transferase                                                | <i>V. cholerae</i>   | Q8RTH7 | 48 | 1.30E-43  | 11953379 |
| VSAL_I0249  | 380 | Lipopolysaccharide biosynthesis protein ( <i>wavR</i> )                      | <i>V. cholerae</i>   | Q8RTH1 | 65 | 3.20E-98  | 15469898 |
| VSAL_I0250  | 373 | Hypothetical protein                                                         | <i>V. vulnificus</i> | Q7MPQ6 | 44 | 9.00E-57  | No       |
| VSAL_I0251  | 396 | Polysaccharide biosynthesis protein                                          | <i>V. cholerae</i>   | O05349 | 27 | 7.20E-15  | 9079898  |
| VSAL_I0252  | 381 | Aminotransferase                                                             | <i>P. aeruginosa</i> | Q8KNA4 | 60 | 1.60E-91  | 12057956 |
| VSAL_I0253  | 394 | UDP-N-acetylglucosamine 2-epimerase ( <i>ptmD</i> )                          | <i>C. coli</i>       | Q7X522 | 42 | 1.70E-50  | 8825781  |
| VSAL_I0254  | 357 | N-acetylneuraminic acid synthase ( <i>ptmC</i> )                             | <i>C. coli</i>       | Q7X523 | 52 | 4.50E-31  | 8825781  |
| VSAL_I0255  | 214 | Putative acetyltransferase                                                   | <i>A. fischeri</i>   | Q5E8K7 | 89 | 6.80E-65  | No       |
| VSAL_I0256  | 352 | Nucleotidyl transferase ( <i>ptmE</i> )                                      | <i>C. coli</i>       | Q7X521 | 43 | 5.90E-31  | 8825781  |
| VSAL_I0257* | 230 | Putative acylneuraminase cytidyltransferase                                  | <i>E. coli</i>       | Q93NQ1 | 42 | 3.80E-21  | 11404020 |
| VSAL_I0258  | 367 | Putative pseudaminic acid biosynthesis protein                               | <i>C. jejuni</i>     | Q939J7 | 36 | 6.60E-39  | 16573682 |
| VSAL_I0265  | 484 | Putative metallo-beta-lactamase ( <i>wbfZ</i> )                              | <i>V. cholerae</i>   | O87142 | 59 | 1.20E-74  | 10521656 |
| VSAL_I0270  | 174 | Putative lipoprotein ( <i>wbfA</i> )                                         | None                 |        |    |           |          |

|   |             |     |                                                                       |                       |        |    |           |              |          |
|---|-------------|-----|-----------------------------------------------------------------------|-----------------------|--------|----|-----------|--------------|----------|
| ↑ | VSAL_I0272  | 735 | Putative outer membrane protein ( <i>wbfB</i> )                       | <i>V. cholerae</i>    | O87145 | 50 | 4.40E-145 |              | 10521656 |
|   | VSAL_I0273  | 254 | Exported protein ( <i>wbfC</i> )                                      | <i>V. cholerae</i>    | Q56655 | 30 | 2.40E-09  |              | 10521656 |
|   | VSAL_I0274  | 221 | Putative lipoprotein ( <i>wbfD</i> )                                  | <i>V. cholerae</i>    | Q56656 | 34 | 1.30E-18  |              | 10521656 |
|   | VSAL_I0275  | 85  | Membrane protein                                                      | <i>A. fischeri</i>    | Q5E8J0 | 71 | 2.00E-10  |              | No       |
|   | VSAL_I0276  | 455 | Putative membrane protein                                             | None                  |        |    |           |              |          |
|   | VSAL_I0277  | 869 | Periplasmic protein involved in polysaccharide export ( <i>wbfF</i> ) | <i>V. cholerae</i>    | Q56658 | 38 | 5.50E-58  | 8793876 and  | 10521656 |
|   | VSAL_I0278  | 325 | O-antigen length determinant protein ( <i>wzz</i> )                   | <i>V. cholerae</i>    | O87149 | 53 | 3.80E-52  |              | 10521656 |
|   | VSAL_I3018  | 371 | dTDP-glucose 4,6-dehydratase ( <i>rmlB</i> )                          | <i>V. cholerae</i>    | Q842N5 | 85 | 7.10E-124 | 12949172 and | 16113305 |
|   | VSAL_I3019  | 295 | Glucose-1-phosphate thymidyl transferase ( <i>rmlA</i> )              | <i>V. cholerae</i>    | Q842R4 | 83 | 1.10E-93  | 12949172 and | 16113305 |
|   | VSAL_I3020* | 293 | dTDP-6-deoxy-l-mannose-dehydrogenase ( <i>rmlD</i> )                  | <i>V. cholerae</i>    | Q842P5 | 68 | 2.00E-72  | 12949172 and | 16113305 |
|   | VSAL_I3021  | 184 | dTDP-6-deoxy-D-xylo-4-hexulose-3,5-epimerase ( <i>rmlC</i> )          | <i>V. cholerae</i>    | Q842R2 | 84 | 7.60E-58  | 12949172 and | 16113305 |
|   | VSAL_I3024  | 292 | Putative glycosyl transferase                                         | <i>E. coli</i>        | Q9X4C3 | 33 | 1.50E-10  |              | 10200954 |
|   | VSAL_I3025  | 427 | Membrane protein                                                      | None                  |        |    |           |              |          |
|   | VSAL_I3026  | 280 | Putative glycosyl transferase ( <i>wbfP</i> )                         | <i>S. boydii</i>      | Q6QQW8 | 30 | 2.90E-07  |              | 15109730 |
|   | VSAL_I3027  | 267 | Putative glycosyl transferase ( <i>wbfO</i> )                         | <i>V. cholerae</i>    | P74947 | 31 | 1.50E-07  |              | 10521656 |
|   | VSAL_I3028  | 190 | Putative lipopolysaccharide biosynthesis O-acetyl transferase         | <i>E. coli</i>        | P37750 | 35 | 2.00E-08  |              | 7517391  |
|   | VSAL_I3029  | 378 | Putative NAD dependent epimerase/dehydratase ( <i>wbfW</i> )          | <i>V. cholerae</i>    | Q56626 | 26 | 9.00E-22  |              | 8820651  |
|   | VSAL_I3030  | 333 | Putative lipopolysaccharide biosynthesis protein                      | <i>A. hydrophila</i>  | Q8KXE8 | 29 | 1.80E-14  |              | 11953367 |
|   | VSAL_I3031  | 320 | O-antigen biosynthetic gene ( <i>wbfT</i> )                           | <i>V. cholerae</i>    | Q56623 | 41 | 3.70E-33  |              | 8820651  |
|   | VSAL_I3032  | 182 | Capsular polysaccharide synthesis enzyme ( <i>wbfU</i> )              | <i>V. cholerae</i>    | Q56624 | 88 | 1.90E-56  |              | 8820651  |
|   | VSAL_I3033  | 644 | Polysaccharide biosynthesis protein ( <i>wbfY</i> )                   | <i>V. cholerae</i>    | Q56627 | 71 | 6.80E-152 |              | 8820651  |
|   | VSAL_p54_01 | 642 | Acyltransferase                                                       | <i>S. typhimurium</i> | P74874 | 34 | 6.30E-54  |              | 8830685  |
|   | VSAL_p43_02 | 321 | Acyltransferase                                                       | Bacteriophage Sf6     | P23214 | 29 | 4.20E-11  |              | 2014005  |

### Capsule polysaccharide biosynthesis

|  |                    |     |                                                                       |                    |        |    |           |  |          |
|--|--------------------|-----|-----------------------------------------------------------------------|--------------------|--------|----|-----------|--|----------|
|  | VSAL_I3010         | 207 | Putative capsular polysaccharide biosynthesis protein ( <i>neuD</i> ) | <i>E. coli</i>     | Q46674 | 68 | 5.20E-49  |  | 7814319  |
|  | VSAL_I3011         | 346 | Putative sialic acid synthase ( <i>neuB</i> )                         | <i>E. coli</i>     | Q46675 | 69 | 6.70E-84  |  | 7814319  |
|  | VSAL_I3012         | 417 | N-acylneuraminase cytidyltransferase ( <i>neuA</i> )                  | <i>E. coli</i>     | P13266 | 52 | 2.30E-77  |  | 2549035  |
|  | VSAL_I3013         | 388 | Polysialic acid biosynthesis protein ( <i>neuC</i> )                  | <i>E. coli</i>     | Q47400 | 59 | 2.90E-84  |  | 1729218  |
|  | VSAL_I3014         | 422 | Putative exopolysaccharide biosynthesis protein                       | <i>A. punctata</i> | Q7BR79 | 56 | 3.90E-79  |  | 11119490 |
|  | VSAL_I3015         | 298 | Hypothetical protein                                                  | <i>R. baltica</i>  | Q7ULW0 | 35 | 2.00E-18  |  | No       |
|  | VSAL_I3016         | 321 | Lipooligosaccharide sialyltransferase                                 | <i>E. coli</i>     | Q93NP9 | 29 | 5.90E-14  |  | 11404020 |
|  | <b>VSAL_II0295</b> | 214 | Bacterial sugar transferase                                           | <i>A. fischeri</i> | Q5DYN9 | 88 | 5.90E-71  |  | No       |
|  | <b>VSAL_II0296</b> | 394 | Putative transmembrane glycosyl transferase                           | <i>A. fischeri</i> | Q5DYP0 | 70 | 2.10E-105 |  | No       |
|  | <b>VSAL_II0297</b> | 362 | Putative glycosyl transferase                                         | <i>A. fischeri</i> | Q5DYP1 | 68 | 8.40E-100 |  | No       |
|  | <b>VSAL_II0298</b> | 499 | Putative membrane protein                                             | <i>A. fischeri</i> | Q5DYP2 | 81 | 7.40E-139 |  | No       |
|  | <b>VSAL_II0299</b> | 385 | Putative glycosyl transferase                                         | <i>V. cholerae</i> | Q06BC1 | 25 | 3.10E-16  |  | 17362509 |
|  | <b>VSAL_II0300</b> | 251 | Hypothetical protein                                                  | <i>A. fischeri</i> | Q5DYP4 | 85 | 3.00E-83  |  | No       |
|  | <b>VSAL_II0301</b> | 464 | O-antigen polymerase                                                  | <i>A. fischeri</i> | Q5DYP5 | 80 | 2.00E-132 |  | No       |
|  | <b>VSAL_II0302</b> | 480 | Putative capsular polysaccharide synthesis protein                    | <i>A. fischeri</i> | Q5DYP6 | 69 | 5.70E-119 |  | No       |
|  | <b>VSAL_II0303</b> | 387 | Putative glycosyl transferase                                         | <i>A. fischeri</i> | Q5DYP7 | 72 | 8.90E-124 |  | No       |
|  | <b>VSAL_II0304</b> | 426 | Putative glycosyl transferase                                         | <i>A. fischeri</i> | Q5DYP8 | 74 | 1.10E-125 |  | No       |

|   |                    |     |                                                            |                      |        |    |           |          |
|---|--------------------|-----|------------------------------------------------------------|----------------------|--------|----|-----------|----------|
| ↑ | <b>VSAL_II0305</b> | 330 | Putative glycosyl transferase                              | <i>S. pneumoniae</i> | Q9AHA1 | 24 | 2.00E-05  | 11179285 |
|   | <b>VSAL_II0306</b> | 501 | Transcriptional regulatory protein ( <i>luxO</i> )         | <i>V. Harveyi</i>    | P54299 | 49 | 4.90E-79  | 8065259  |
|   | <b>VSAL_II0307</b> | 755 | Response regulator, histidine kinase                       | <i>A. Fischeri</i>   | Q5DYQ1 | 66 | 4.40E-145 | No       |
|   | <b>VSAL_II0308</b> | 506 | Putative response regulator                                | <i>A. Fischeri</i>   | Q5DYQ2 | 66 | 6.40E-133 | No       |
|   | <b>VSAL_II0309</b> | 235 | Putative capsular polysaccharide synthesis protein         | <i>S. pneumoniae</i> | P72512 | 27 | 7.40E-05  | 8682774  |
|   | <b>VSAL_II0310</b> | 703 | Polysaccharide biosynthesis/export protein ( <i>kpsD</i> ) | <i>E. coli</i>       | P42213 | 24 | 3.30E-07  | 8397187  |
|   | <b>VSAL_II0311</b> | 275 | Outer membrane protein                                     | <i>A. Fischeri</i>   | Q5DYQ5 | 89 | 3.00E-93  | No       |

## Secretion

### T1SS

|  |                   |     |                                            |                    |        |    |           |          |
|--|-------------------|-----|--------------------------------------------|--------------------|--------|----|-----------|----------|
|  | <b>VSAL_I2675</b> | 441 | Outer membrane protein ( <i>toIC</i> )     | <i>V. cholerae</i> | Q9K2Y1 | 74 | 1.50E-114 | 15547287 |
|  | <b>VSAL_I0528</b> | 431 | Hemolysin secretion protein precursor HlyB | <i>V. cholerae</i> | P15492 | 46 | 9.10E-24  | 2162464  |

### T1SSI

|   |                     |     |                                      |                    |        |    |           |          |
|---|---------------------|-----|--------------------------------------|--------------------|--------|----|-----------|----------|
| ↑ | <b>VSAL_II1098</b>  | 707 | ABC transporter ATP-binding protein  | <i>V. cholerae</i> | Q9KKL9 | 78 | 3.20E-180 | No       |
|   | <b>VSAL_II1099</b>  | 641 | Membrane signal transduction protein | <i>V. cholerae</i> | Q9KKM1 | 56 | 4.20E-78  | No       |
|   | <b>VSAL_II1100*</b> | 220 | Hypothetical protein                 | <i>V. cholerae</i> | Q9KKM2 | 67 | 8.40E-57  | No       |
|   | <b>VSAL_II1101</b>  | 463 | Secretion protein, HlyD family       | <i>V. cholerae</i> | Q9KKM3 | 67 | 4.60E-109 | 15547287 |
|   | <b>VSAL_II1102</b>  | 717 | Putative exported ATPase protein     | <i>V. cholerae</i> | Q9KKJ5 | 36 | 4.10E-57  | No       |

### T1SSII

|   |                    |     |                                                                       |                       |        |    |          |         |
|---|--------------------|-----|-----------------------------------------------------------------------|-----------------------|--------|----|----------|---------|
| ↓ | <b>VSAL_II0055</b> | 104 | Hypothetical protein                                                  | <i>A. Fischeri</i>    | Q5DYR3 | 59 | 1.30E-18 | No      |
|   | <b>VSAL_II0056</b> | 442 | Putative type I secretion protein, HlyD family                        | <i>P. profundum</i>   | Q1Z9Z3 | 55 | 2.10E-83 | No      |
|   | <b>VSAL_II0057</b> | 741 | Putative membrane associated response regulator                       | <i>P. profundum</i>   | Q6LGG3 | 39 | 1.20E-36 | No      |
|   | <b>VSAL_II0058</b> | 456 | Putative type I toxin secretion system, outer membrane efflux protein | <i>P. aeruginosa</i>  | Q03027 | 21 | 1.80E-12 | 1427098 |
|   | <b>VSAL_II0059</b> | 527 | Putative type I toxin secretion system, membrane transport protein    | <i>P. fluorescens</i> | Q67993 | 23 | 5.10E-09 | 9501431 |
|   | <b>VSAL_II0060</b> | 717 | Putative type I toxin secretion system, ATP-binding protein           | <i>S. marcescens</i>  | Q54456 | 24 | 5.40E-21 | 7592412 |

### T1SSIII

|   |                    |     |                                                       |                     |        |    |          |          |
|---|--------------------|-----|-------------------------------------------------------|---------------------|--------|----|----------|----------|
| ↓ | <b>VSAL_II0063</b> | 566 | Putative type I secretion system, ATP-binding protein | <i>Y. ruckeri</i>   | Q8VLR8 | 38 | 1.20E-60 | 12101310 |
|   | <b>VSAL_II0064</b> | 429 | Putative type I secretion protein, HlyD family        | <i>P. profundum</i> | Q1Z578 | 58 | 3.00E-85 | No       |
|   | <b>VSAL_II0065</b> | 80  | Membrane protein                                      | None                |        |    |          |          |
|   | <b>VSAL_II0066</b> | 252 | Membrane protein                                      | None                |        |    |          |          |

### T2SSI

|   |                   |     |                                                     |                    |        |    |           |         |
|---|-------------------|-----|-----------------------------------------------------|--------------------|--------|----|-----------|---------|
| ↑ | <b>VSAL_I2914</b> | 253 | General secretion pathway protein N ( <i>epsN</i> ) | <i>V. cholerae</i> | P41852 | 42 | 3.50E-39  | 9371445 |
|   | <b>VSAL_I2915</b> | 163 | General secretion pathway protein M ( <i>epsM</i> ) | <i>V. cholerae</i> | P41851 | 48 | 1.10E-29  | 9371445 |
|   | <b>VSAL_I2916</b> | 411 | General secretion pathway protein L ( <i>epsL</i> ) | <i>V. cholerae</i> | P45782 | 42 | 6.90E-24  | 9371445 |
|   | <b>VSAL_I2917</b> | 339 | General secretion pathway protein K ( <i>epsK</i> ) | <i>V. cholerae</i> | P45781 | 60 | 3.40E-76  | 9371445 |
|   | <b>VSAL_I2918</b> | 215 | General secretion pathway protein J ( <i>epsJ</i> ) | <i>V. cholerae</i> | P45776 | 54 | 3.80E-43  | 9371445 |
|   | <b>VSAL_I2919</b> | 125 | General secretion pathway protein I ( <i>epsI</i> ) | <i>V. cholerae</i> | P45775 | 62 | 3.00E-24  | 9371445 |
|   | <b>VSAL_I2920</b> | 198 | General secretion pathway protein H ( <i>epsH</i> ) | <i>V. cholerae</i> | P45774 | 46 | 1.00E-30  | 9371445 |
|   | <b>VSAL_I2921</b> | 149 | General secretion pathway protein G ( <i>epsG</i> ) | <i>V. cholerae</i> | P45773 | 85 | 7.80E-46  | 9371445 |
|   | <b>VSAL_I2922</b> | 405 | General secretion pathway protein F ( <i>epsF</i> ) | <i>V. cholerae</i> | P45780 | 72 | 7.00E-110 | 9371445 |
|   | <b>VSAL_I2923</b> | 499 | General secretion pathway protein E ( <i>epsE</i> ) | <i>V. cholerae</i> | P37093 | 78 | 3.50E-127 | 9371445 |
|   | <b>VSAL_I2924</b> | 675 | General secretion pathway protein D ( <i>epsD</i> ) | <i>V. cholerae</i> | P45779 | 79 | 3.90E-184 | 9371445 |
|   | <b>VSAL_I2925</b> | 303 | General secretion pathway protein C ( <i>epsC</i> ) | <i>V. cholerae</i> | P45777 | 48 | 4.20E-45  | 9371445 |

**Flp-type pilus  
(Subtype of T2SS)**

| GI-VSA5 | VSAL ID     | Description                                                      | Species                         | Accession | Length | E-value  | Match ID |
|---------|-------------|------------------------------------------------------------------|---------------------------------|-----------|--------|----------|----------|
|         | VSAL_II0366 | 69 Fimbrial protein, Flp/Fap pilin component Flp1                | <i>A. actinomycetemcomitans</i> | O66149    | 32     | 4.00E-03 | 12717435 |
|         | VSAL_II0367 | 144 Type IV leader peptidase ( <i>tadV</i> )                     | <i>A. actinomycetemcomitans</i> | Q7X0M3    | 33     | 5.70E-07 | 12717435 |
|         | VSAL_II0368 | 260 Putative Flp pilus assembly protein CpaB                     | <i>A. fischeri</i>              | Q5E107    | 60     | 1.50E-49 | No       |
|         | VSAL_II0369 | 445 Type II/III secretion system protein ( <i>rcpA</i> )         | <i>A. actinomycetemcomitans</i> | Q7X0M1    | 36     | 7.20E-27 | 12717435 |
|         | VSAL_II0370 | 169 Putative lipoprotein                                         | <i>A. fischeri</i>              | Q5E105    | 56     | 1.70E-36 | No       |
|         | VSAL_II0371 | 405 Type II secretion system protein ( <i>tadZ</i> )             | <i>A. actinomycetemcomitans</i> | Q8GCZ9    | 25     | 2.00E-03 | 12717435 |
|         | VSAL_II0372 | 428 Type II secretion system protein ( <i>tadA</i> )             | <i>A. actinomycetemcomitans</i> | Q9XC06    | 53     | 1.30E-77 | 12717435 |
|         | VSAL_II0373 | 303 Type II secretion system protein ( <i>tadB</i> )             | <i>A. actinomycetemcomitans</i> | Q9XC05    | 37     | 5.30E-28 | 12717435 |
|         | VSAL_II0374 | 292 Type II secretion system protein ( <i>tadC</i> )             | <i>A. actinomycetemcomitans</i> | Q9S4A8    | 33     | 7.00E-23 | 12717435 |
|         | VSAL_II0375 | 247 Putative secretion system protein ( <i>tadD</i> )            | <i>A. actinomycetemcomitans</i> | Q9S4A7    | 30     | 7.10E-13 | 12717435 |
|         | VSAL_II0376 | 162 Membrane associated secretion system protein ( <i>tadE</i> ) | <i>A. actinomycetemcomitans</i> | Q7X0L4    | 24     | 7.50E-01 | 12717435 |
|         | VSAL_II0377 | 179 Membrane associated secretion system protein ( <i>tadF</i> ) | <i>A. actinomycetemcomitans</i> | Q9S4A5    | 31     | 7.20E-08 | 12717435 |
| ▼       | VSAL_II0378 | 422 Membrane associated secretion system protein ( <i>tadG</i> ) | <i>A. actinomycetemcomitans</i> | Q9S4A4    | 21     | 4.60E-04 | 12717435 |

**T6SSI**

| GI-VS5 | VSAL ID     | Description                                                     | Species                  | Accession | Length | E-value   | Match ID             |
|--------|-------------|-----------------------------------------------------------------|--------------------------|-----------|--------|-----------|----------------------|
|        | VSAL_I1112  | 217 Serine/threonine phosphoprotein phosphatase ( <i>vasL</i> ) | <i>P. aeruginosa</i>     | Q9I355    | 36     | 9.70E-18  | 16763151             |
|        | VSAL_I1113* | 1172 Putative type VI secretion protein ( <i>vasK</i> )         | <i>P. aeruginosa</i>     | Q9I356    | 36     | 7.20E-150 | 16763151             |
|        | VSAL_I1114  | 275 Putative membrane protein ( <i>vasF</i> )                   | <i>P. aeruginosa</i>     | Q9I357    | 50     | 1.30E-50  | 16763151             |
|        | VSAL_I1115  | 440 Putative type VI secretion protein ( <i>vasE</i> )          | <i>P. aeruginosa</i>     | Q9I358    | 47     | 1.10E-82  | 16763151             |
|        | VSAL_I1116  | 162 Putative type VI secretion protein ( <i>vasD</i> )          | <i>P. aeruginosa</i>     | Q9I359    | 40     | 3.00E-14  | 16763151             |
|        | VSAL_I1117  | 453 Putative type VI secretion protein ( <i>vasC</i> )          | <i>P. aeruginosa</i>     | Q9I360    | 32     | 1.20E-07  | 16763151             |
|        | VSAL_I1118* | 507 Transcriptional regulatory protein ( <i>vasH</i> )          | <i>P. aeruginosa</i>     | Q9I362    | 40     | 3.00E-44  | 16763151             |
|        | VSAL_I1119  | 872 Chaperone ClpB ( <i>vasG</i> )                              | <i>Y. enterocolitica</i> | Q9F746    | 42     | 9.00E-111 | 10986262             |
|        | VSAL_I1120  | 309 Putative type VI secretion protein ( <i>vasB</i> )          | <i>P. aeruginosa</i>     | Q9I364    | 48     | 2.80E-56  | 16763151             |
|        | VSAL_I1121  | 583 Putative type VI secretion protein ( <i>vasA</i> )          | <i>V. cholerae</i>       | Q9KN55    | 36     | 3.30E-74  | 16432199             |
|        | VSAL_I1122  | 141 Putative type VI secretion protein ( <i>vasS</i> )          | <i>P. aeruginosa</i>     | Q9I366    | 33     | 0.0001    | 16763151             |
|        | VSAL_I1123  | 491 Putative type VI secretion protein ( <i>vasR</i> )          | <i>P. aeruginosa</i>     | Q9I367    | 73     | 5.40E-150 | 16763151             |
|        | VSAL_I1124  | 164 Putative type VI secretion protein ( <i>vasQ</i> )          | <i>P. aeruginosa</i>     | Q9I368    | 61     | 2.90E-31  | 16763151             |
| ▼      | VSAL_I1125  | 513 Putative type VI secretion protein ( <i>vasJ</i> )          | <i>P. aeruginosa</i>     | Q9I369    | 28     | 4.80E-40  | 16763151             |
|        | VSAL_I1357  | 172 Secreted hemolysin co-regulated protein Hcp-2               | <i>V. cholerae</i>       | P72350    | 54     | 2.30E-35  | 8557353 and 16432199 |
|        | VSAL_I1358  | 754 VgrG protein VgrG-2                                         | <i>V. cholerae</i>       | Q9KNE7    | 34     | 2.20E-68  | 16432199             |
|        | VSAL_I1359  | 197 Hypothetical protein                                        | None                     |           |        |           |                      |
| ▼      | VSAL_I1360* | 664 Putative peptidoglycan-binding LysM                         | None                     |           |        |           |                      |

**Duplicated part of T6SSI**

| pVS840 | VSAL ID      | Description                                       | Species            | Accession | Length | E-value  | Match ID |
|--------|--------------|---------------------------------------------------|--------------------|-----------|--------|----------|----------|
|        | VSAL_p840_35 | 172 Secreted hemolysin co-regulated protein Hcp-2 | <i>V. cholerae</i> | P72350    | 53     | 4.00E-35 | 8557353  |
|        | VSAL_p840_36 | 754 VgrG protein VgrG-2                           | <i>V. cholerae</i> | Q9KNE7    | 36     | 1.90E-69 | 16432199 |
|        | VSAL_p840_37 | 186 Hypothetical protein                          | None               |           |        |          |          |
| ▼      | VSAL_p840_38 | 814 Putative peptidoglycan-binding LysM           | None               |           |        |          |          |



**T6SSII**

|             |             |                                               |                                                      |                          |        |          |                      |          |
|-------------|-------------|-----------------------------------------------|------------------------------------------------------|--------------------------|--------|----------|----------------------|----------|
| Gh-VS6<br>↓ | VSAL_I1167  | 186                                           | Putative type VI secretion protein ( <i>vasU-1</i> ) | <i>V. splendidus</i>     | A3USE8 | 64       | 7.80E-49             | No       |
|             | VSAL_I1168  | 98                                            | Putative type VI secretion protein ( <i>vasV-1</i> ) | <i>V. splendidus</i>     | A3USE9 | 89       | 6.80E-36             | No       |
|             | VSAL_I1169  | 461                                           | Putative type VI secretion protein VasJ-1            | <i>R. leguminosarum</i>  | Q93ED3 | 24       | 0.0033               | 12580282 |
|             | VSAL_I1170  | 130                                           | Secreted hemolysin-coregulated protein Hcp-3         | <i>P. aeruginosa</i>     | Q9I747 | 24       | 0.52                 | 16763151 |
|             | VSAL_I1171  | 169                                           | Putative type VI secretion protein VasQ-1            | <i>R. leguminosarum</i>  | Q93ED2 | 48       | 5.20E-21             | 12580282 |
|             | VSAL_I1172  | 493                                           | Putative type VI secretion protein VasRA-1           | <i>R. leguminosarum</i>  | Q93ED1 | 51       | 1.20E-94             | 12580282 |
|             | VSAL_I1173  | 453                                           | Putative type VI secretion protein VasRB-1           | <i>R. leguminosarum</i>  | Q93ED1 | 28       | 1.30E-19             | 12580282 |
|             | VSAL_I1174  | 140                                           | Putative type VI secretion protein VasS-1            | None                     |        |          |                      |          |
|             | VSAL_I1175  | 593                                           | Putative type VI secretion protein VasA-1            | <i>R. leguminosarum</i>  | Q93EC7 | 28       | 1.00E-44             | 12580282 |
|             | VSAL_I1176  | 327                                           | Putative type VI secretion protein VasB-1            | <i>P. aeruginosa</i>     | Q9I743 | 20       | 0.0056               | 16763151 |
|             | VSAL_I1177  | 872                                           | Chaperone ClpB-1                                     | <i>Y. enterocolitica</i> | Q9F746 | 42       | 4.70E-112            | 10986262 |
|             | VSAL_I1178  | 52                                            | Putative type VI secretion protein VasV-1            | None                     |        |          |                      |          |
|             | VSAL_I1179  | 314                                           | Putative type VI secretion protein VasC-1            | <i>P. aeruginosa</i>     | Q9I751 | 30       | 4.9                  | 16763151 |
|             | VSAL_I1180  | 154                                           | Putative type VI secretion protein VasD-1            | <i>P. aeruginosa</i>     | Q9I752 | 34       | 2.80E-07             | 16763151 |
|             | VSAL_I1181  | 438                                           | Putative type VI secretion protein VasE-1            | <i>R. leguminosarum</i>  | Q93EC4 | 29       | 7.30E-22             | 12580282 |
|             | VSAL_I1182  | 374                                           | Putative type VI secretion protein VasF-1            | <i>P. aeruginosa</i>     | Q9I357 | 27       | 8.20E-12             | 16763151 |
|             | VSAL_I1183* | 1144                                          | Putative type VI secretion protein VasK-1            | <i>P. aeruginosa</i>     | Q9I356 | 26       | 1.10E-56             | 16763151 |
|             | VSAL_I1184  | 432                                           | Transposase                                          | <i>E. agglomerans</i>    | P71168 | 57       | 4.10E-104            | No       |
| VSAL_I1185  | 618         | Putative type VI secretion protein VasX-1     | <i>V. splendidus</i>                                 | A3USC8                   | 45     | 1.20E-29 | No                   |          |
| VSAL_I1202  | 173         | Secreted hemolysin co-regulated protein Hcp-1 | <i>V. cholerae</i>                                   | P72350                   | 54     | 1.10E-34 | 8557353 and 16432199 |          |
| VSAL_I1744* | 695         | VgrG protein VgrG-1                           | <i>V. cholerae</i>                                   | Q9KNE7                   | 42     | 1.20E-93 | 16432199             |          |

**Exotoxin**

|                    |      |                                            |                       |        |    |           |          |
|--------------------|------|--------------------------------------------|-----------------------|--------|----|-----------|----------|
| VSAL_I0411         | 590  | Hemolysin ( <i>vah5</i> )                  | <i>V. anguillarum</i> | Q4LEW4 | 55 | 2.80E-126 | 16126365 |
| VSAL_I0993         | 291  | Hemolysin ( <i>vah2</i> )                  | <i>V. anguillarum</i> | Q4LEW7 | 80 | 1.00E-74  | 16126365 |
| VSAL_I0818         | 207  | ATP-dependent protease ( <i>clpP</i> )     | <i>S. typhimurium</i> | P0A1D7 | 74 | 1.10E-57  | 11292737 |
| VSAL_I1710*        | 4403 | Putative hemolysin                         | <i>A. fischeri</i>    | Q5E4P5 | 68 | 0.00E+00  | No       |
| VSAL_I0049         | 215  | Hemolysin ( <i>hlyIII</i> )                | <i>V. vulnificus</i>  | Q7X3Y6 | 69 | 7.40E-48  | 15386100 |
| <b>VSAL_I10020</b> | 2890 | Hemolysin-type calcium-binding protein     | <i>S. hyicus</i>      | Q4ZHU0 | 25 | 2.40E-25  | 16000737 |
| <b>VSAL_I10423</b> | 323  | Exported serine protease, trypsin elastase | <i>A. fischeri</i>    | Q5E0V3 | 60 | 4.80E-72  | No       |
| VSAL_p320_15       | 205  | Putative peptidase, S24-like               | Bacteriophage phi-80  | P14819 | 29 | 1.50E-07  | 3172255  |

**Iron acquisition**

**Heme uptake**

|        |             |     |                                                     |                            |        |    |          |          |
|--------|-------------|-----|-----------------------------------------------------|----------------------------|--------|----|----------|----------|
| ↑<br>↓ | VSAL_I1748  | 176 | Heme uptake and utilization protein ( <i>huvZ</i> ) | <i>V. anguillarum</i>      | Q70YH4 | 69 | 5.00E-42 | 15342586 |
|        | VSAL_I1749  | 168 | Heme uptake and utilization protein ( <i>huvX</i> ) | <i>V. anguillarum</i>      | Q70YH3 | 60 | 1.40E-34 | 15342586 |
|        | VSAL_I1750  | 440 | Putative coproporphyrinogen oxidase PhuW            | <i>V. parahaemolyticus</i> | Q9XCYY | 59 | 9.30E-98 | 10348876 |
|        | VSAL_I1751* | 248 | TonB protein ( <i>tonB1</i> )                       | <i>V. anguillarum</i>      | Q70YH2 | 45 | 6.10E-33 | 15342586 |
|        | VSAL_I1752  | 226 | TonB system transport protein ( <i>exbB1</i> )      | <i>V. anguillarum</i>      | Q70YH1 | 54 | 1.40E-40 | 15342586 |
|        | VSAL_I1753  | 141 | TonB system transport protein ( <i>exbD1</i> )      | <i>V. anguillarum</i>      | Q70YH0 | 60 | 1.30E-24 | 15342586 |
|        | VSAL_I1754  | 290 | Heme transporter protein ( <i>huvB</i> )            | <i>V. anguillarum</i>      | Q70YG9 | 62 | 8.90E-52 | 15342586 |
|        | VSAL_I1755  | 345 | Heme transporter protein ( <i>huvC</i> )            | <i>V. anguillarum</i>      | Q70YG8 | 72 | 3.90E-71 | 15342586 |
|        | VSAL_I1756  | 260 | Heme transporter protein ( <i>huvD</i> )            | <i>V. anguillarum</i>      | Q659V4 | 57 | 5.70E-47 | 15342586 |

|                              |              |                                            |                                                                    |                          |        |           |           |                      |
|------------------------------|--------------|--------------------------------------------|--------------------------------------------------------------------|--------------------------|--------|-----------|-----------|----------------------|
| Siderophore synthesis/uptake | VSAL_II0110  | 693                                        | TonB dependent receptor                                            | <i>S. typhimurium</i>    | Q56145 | 27        | 8.70E-31  | 10103258             |
|                              | VSAL_II0111  | 255                                        | Putative exported protein                                          | <i>V. cholerae</i>       | Q9ZHW2 | 57        | 6.50E-47  | 9781885 and 11169119 |
|                              | VSAL_II0112  | 451                                        | Biopolymer transport protein ( <i>ToIR2</i> )                      | <i>V. cholerae</i>       | Q9ZHW1 | 58        | 2.00E-88  | 9781885 and 11169119 |
|                              | VSAL_II0113  | 169                                        | TonB system transport protein ( <i>exbB2</i> )                     | <i>V. cholerae</i>       | Q9ZHW0 | 74        | 1.30E-46  | 9781885 and 11169119 |
|                              | VSAL_II0114  | 134                                        | TonB system transport protein ( <i>exbD2</i> )                     | <i>V. cholerae</i>       | Q9ZHV9 | 88        | 6.10E-39  | 9781885 and 11169119 |
|                              | VSAL_II0115  | 206                                        | TonB protein ( <i>tonB2</i> )                                      | <i>V. cholerae</i>       | Q9ZHV8 | 53        | 4.50E-39  | 9781885 and 11169119 |
|                              | VSAL_II0116  | 400                                        | Putative exported protein                                          | <i>V. cholerae</i>       | Q9ZHV7 | 51        | 4.10E-72  | 9781885 and 11169119 |
|                              | VSAL_II0901  | 207                                        | TonB3 protein ( <i>tonB3</i> )                                     | <i>V. anguillarum</i>    | Q5SDB0 | 62        | 7.50E-45  | 15557661             |
|                              | VSAL_II0902  | 134                                        | TonB system transport protein ( <i>exbD3</i> )                     | <i>V. anguillarum</i>    | Q5SDB1 | 90        | 1.90E-40  | 15557661             |
|                              | VSAL_II0903  | 177                                        | TonB system transport protein ( <i>exbB3</i> )                     | <i>V. anguillarum</i>    | Q5SDB2 | 74        | 1.70E-47  | 15557661             |
|                              | VSAL_II0904  | 453                                        | Biopolymer transport protein ( <i>tolR3</i> )                      | <i>V. anguillarum</i>    | Q5SDB3 | 62        | 7.10E-94  | 15557661             |
|                              | VSAL_II0905  | 255                                        | Putative exported protein                                          | <i>A. fischeri</i>       | Q5DZE6 | 79        | 3.60E-64  | No                   |
|                              | VSAL_II0906  | 671                                        | Iron(III) ABC transporter, membrane permease ( <i>hatB</i> )       | <i>V. hollisae</i>       | Q4H463 | 38        | 4.20E-65  | 16809025             |
|                              | VSAL_II0907* | 314                                        | Iron(III) ABC transporter, plasmic binding protein ( <i>hatD</i> ) | <i>V. hollisae</i>       | Q4H464 | 32        | 1.30E-25  | 16809025             |
|                              | VSAL_II0908  | 255                                        | Iron(III) ABC transporter, ATP-binding protein ( <i>hatC</i> )     | <i>V. hollisae</i>       | Q4H465 | 44        | 1.40E-34  | 16809025             |
| VSAL_II0909                  | 716          | Ferrioxamine B receptor                    | <i>V. vulnificus</i>                                               | Q59HH9                   | 59     | 1.10E-164 | 16000245  |                      |
| GlVS3                        | VSAL_I0134   | 515                                        | L-2,4-diaminobutyrate decarboxylase                                | <i>R. meliloti</i>       | Q9Z3R1 | 36        | 3.00E-36  | 11274118             |
|                              | VSAL_I0135   | 442                                        | Siderophore biosynthesis protein ( <i>iucD</i> )                   | <i>E. coli</i>           | Q47318 | 26        | 6.20E-41  | 8003107              |
|                              | VSAL_I0136   | 818                                        | Siderophore biosynthesis protein ( <i>iucC</i> )                   | <i>E. coli</i>           | P11295 | 33        | 1.00E-45  | 3275632              |
|                              | VSAL_I0137   | 721                                        | TonB-dependent iron-siderophore receptor ( <i>fhuE</i> )           | <i>E. coli</i>           | P16869 | 35        | 6.90E-71  | 2162465              |
|                              | VSAL_I0138   | 316                                        | Iron-siderophore ABC transporter ( <i>fepB</i> )                   | <i>E. coli</i>           | P0AEL6 | 22        | 4.80E-05  | 2529253 and 2651410  |
|                              | VSAL_I0139   | 366                                        | Iron-siderophore ABC transporter ( <i>fepD</i> )                   | <i>E. coli</i>           | P23876 | 40        | 1.70E-34  | 2651410              |
|                              | VSAL_I0140   | 341                                        | Iron-siderophore ABC transporter ( <i>fepC</i> )                   | <i>E. coli</i>           | P15029 | 36        | 9.80E-24  | 2651410              |
|                              | VSAL_I0141   | 268                                        | Iron-siderophore ABC transporter ( <i>fepC</i> )                   | <i>E. coli</i>           | P23878 | 44        | 2.30E-33  | 2651410              |
|                              | VSAL_II0150  | 255                                        | Ferrichrome transport ATP-binding protein ( <i>fhuC</i> )          | <i>V. mimicus</i>        | Q76BT0 | 75        | 2.60E-66  | 15215626             |
|                              | VSAL_II0151  | 296                                        | Ferrichrome-binding periplasmic protein ( <i>fhuD</i> )            | <i>V. mimicus</i>        | Q76BS9 | 56        | 4.30E-63  | 15215626             |
|                              | VSAL_II0152  | 662                                        | Ferrichrome transport protein ( <i>fhuB</i> )                      | <i>V. mimicus</i>        | Q76BS8 | 66        | 3.60E-144 | 15215626             |
|                              | VSAL_II0273  | 546                                        | Siderophore biosynthesis protein ( <i>iucA</i> )                   | <i>V. mimicus</i>        | Q76BS7 | 61        | 1.30E-135 | 15215626             |
|                              | VSAL_II0274  | 303                                        | Siderophore biosynthesis protein ( <i>iucB</i> )                   | <i>V. mimicus</i>        | Q76BS6 | 60        | 5.00E-77  | 15215626             |
|                              | VSAL_II0275* | 585                                        | Siderophore biosynthesis protein ( <i>iucC</i> )                   | <i>V. mimicus</i>        | Q76BS5 | 64        | 1.20E-145 | 15215626             |
|                              | VSAL_II0278  | 437                                        | Siderophore biosynthesis protein ( <i>iucD</i> )                   | <i>V. mimicus</i>        | Q76BS4 | 70        | 3.40E-123 | 15215626             |
| VSAL_II0279*                 | 723          | Ferric aerobactin receptor ( <i>iutA</i> ) | <i>V. mimicus</i>                                                  | Q76BS3                   | 73     | 1.60E-209 | 15215626  |                      |
| Iron transport               | VSAL_I2257   | 75                                         | Ferrous iron transport protein ( <i>feoA</i> )                     | <i>S. typhimurium</i>    | Q7CPK6 |           | 1.00E-03  | 8890205              |
|                              | VSAL_I2258   | 758                                        | Ferrous iron transport protein ( <i>feoB</i> )                     | <i>S. typhimurium</i>    | P74884 | 43        | 2.50E-107 | 8890205              |
|                              | VSAL_I2586   | 346                                        | Iron(III) ABC transporter ( <i>fbpC</i> )                          | <i>P. haemolytica</i>    | Q9ZHY0 | 50        | 7.40E-52  | 15175304             |
|                              | VSAL_I2587   | 543                                        | Iron(III) ABC transporter ( <i>fbpB</i> )                          | <i>P. haemolytica</i>    | Q9ZHY1 | 54        | 7.90E-94  | 15175304             |
|                              | VSAL_I2588   | 337                                        | Iron(III) ABC transporter ( <i>fbpA</i> )                          | <i>P. haemolytica</i>    | Q9Z4N6 | 62        | 1.00E-80  | 15175304             |
|                              | VSAL_II1074  | 305                                        | Putative iron transporter, plasmic binding protein                 | <i>A. fischeri</i>       | Q5DYV3 | 82        | 4.40E-87  | No                   |
|                              | VSAL_II1075  | 347                                        | Putative iron transporter, membrane component                      | <i>Y. pestis</i>         | Q56992 | 38        | 5.20E-33  | 10417152             |
|                              | VSAL_II1076  | 259                                        | Putative iron transporter, ATP-binding component                   | <i>P. aeruginosa</i>     | O68877 | 37        | 2.10E-23  | 8633080              |
|                              | VSAL_p320_29 | 354                                        | ABC-type iron ion transport system                                 | <i>R. palustris</i>      | Q6N7E9 | 26        | 6.30E-23  | No                   |
|                              | VSAL_p320_30 | 347                                        | ABC-type iron ion transport system                                 | <i>G. diazotrophicus</i> | Q288C8 | 38        | 1.80E-30  | No                   |
|                              | VSAL_p320_31 | 248                                        | ABC-type iron ion transport system                                 | <i>R. palustris</i>      | Q6N7E7 | 44        | 1.60E-21  | No                   |
|                              | VSAL_p320_32 | 429                                        | Hypothetical protein                                               | <i>R. palustris</i>      | Q6N7E6 | 28        | 6.80E-09  | No                   |

## Miscellaneous

|            |     |                                                |                       |        |    |           |          |
|------------|-----|------------------------------------------------|-----------------------|--------|----|-----------|----------|
| VSAI_I0498 | 489 | RNA polymerase sigma-54 factor ( <i>rpoN</i> ) | <i>V. anguillarum</i> | O08429 | 74 | 1.20E-130 | 9421909  |
| VSAI_I2058 | 313 | Virulence protein VirC                         | <i>V. anguillarum</i> | Q56567 | 51 | 1.00E-52  | 7590330  |
| VSAI_I2777 | 88  | RNA-binding protein Hfq                        | <i>V. cholerae</i>    | Q9KV11 | 88 | 3.30E-28  | 15225327 |

<sup>1</sup>)Direction of arrows indicate transcriptional direction of putative operons (Operons predicted based on functional relatedness of genes within the transcriptional unit, intergenic distances and synteny with other species). Vertical typing indicate location on MGE (Table 2 and plasmids)

<sup>2</sup>)Bold gene\_IDs indicate a location on chr II, while plasmid gene\_IDs are shown in italic

<sup>3</sup>)*A. hydrophila* (*Aeromonas hydrophila*), *P. aeruginosa* (*Pseudomonas aeruginosa*), *E. coli* (*Escherichia coli*), *S. frigidimarina* (*Shewanella frigidimarina*), *R. meliloti* (*Rhizobium meliloti*), *Y. pestis* (*Yersinia pestis*), *C. jejuni* (*Campylobacter jejuni*), *C. coli* (*Campylobacter coli*), *S. boydii* (*Shigella boydii*), *S. typhimurium* (*Salmonella typhimurium*), *A. punctata* (*Aeromonas punctata*), *R. baltica* (*Rhodopirellula baltica*), *S. pneumoniae* (*Streptococcus pneumoniae*), *P. fluorescens* (*Pseudomonas fluorescens*), *S. marcescens* (*Serratia marcescens*), *Y. ruckeri* (*Yersinia ruckeri*), *A. Actinomycetemcomitans* (*Actinobacillus actinomycetemcomitans*), *Y. enterocolitica* (*Yersinia enterocolitica*), *R. leguminosarum* (*Rhizobium leguminosarum*), *E. agglomerans* (*Enterobacter agglomerans*), *S. Hyicus* (*Staphylococcus hyicus*), *P. haemolytica* (*Pasteurella haemolytica*), *R. palustris* (*Rhodopseudomonas palustris*) and *G. diazotrophicus* (*Gluconacetobacter diazotrophicus*)

\*Indicate pseudogenes and gene remnants
