# Supplementary material for: The genome sequence of the fish pathogen Aliivibrio salmonicida strain LFI1238 shows extensive evidence of gene decay
Source: Springer Nature journal article supplement (doi:10.1186/1471-2164-9-616), 2008-12-01
Supplement: Additional file 11 [file 1471-2164-9-616-s11.pdf]

**Additional file 11.** Functional distribution of inactivated genes in the *A. salmonicida* genome.

| Gene ID                 | Redundancy*         | Product                        | Type of inactivation                                                 |
|-------------------------|---------------------|--------------------------------|----------------------------------------------------------------------|
| <b>Unknown function</b> |                     |                                |                                                                      |
| VSAL_I0063              |                     | hypothetical protein           | Contains a nonsense mutation                                         |
| VSAL_I0064              |                     | hypothetical protein           | Truncated by the downstream IS element                               |
| VSAL_I0200              |                     | hypothetical protein           | Disrupted by an IS element                                           |
| VSAL_I0285              |                     | hypothetical protein           | Disrupted by an IS element                                           |
| VSAL_I0482              |                     | hypothetical protein MshQ      | Contains a frameshift                                                |
| VSAL_I0776              |                     | hypothetical protein           | Truncated at the N-terminus                                          |
| VSAL_I0958              |                     | hypothetical protein           | Disrupted by an IS element                                           |
| VSAL_I0964              |                     | hypothetical protein           | Contains a frameshift                                                |
| VSAL_I1089              |                     | conserved hypothetical protein | Disrupted by an IS element                                           |
| VSAL_I1111              |                     | hypothetical protein           | Truncated at the C-terminus                                          |
| VSAL_I1167              |                     | hypothetical protein           | Contains a nonsense mutation                                         |
| VSAL_I1219              |                     | hypothetical protein           | Truncated by the downstream IS element                               |
| VSAL_I1277              | Part of VSAL_I1992  | hypothetical protein           | Truncated by the up- and downstream IS element                       |
| VSAL_I1380              |                     | hypothetical protein           | Truncated by the upstream IS element                                 |
| VSAL_I1423              |                     | hypothetical protein           | Contains a nonsense mutation                                         |
| VSAL_I1458              |                     | hypothetical protein           | Extended by the downstream IS element                                |
| VSAL_I1468              |                     | hypothetical protein           | Truncated at the N-terminus                                          |
| VSAL_I1474              |                     | hypothetical protein           | Truncated at the C-terminus                                          |
| VSAL_I1496              |                     | hypothetical protein           | Truncated at the C-terminus                                          |
| VSAL_I1661              |                     | hypothetical protein           | Truncated by the upstream IS element                                 |
| VSAL_I1682              |                     | hypothetical protein           | Truncated by the downstream IS element                               |
| VSAL_I1704              |                     | hypothetical protein           | Truncated by the upstream IS element                                 |
| VSAL_I1717              |                     | hypothetical protein           | Truncated by the upstream IS element and C-term truncation           |
| VSAL_I1719              |                     | hypothetical protein           | Truncated by the downstream IS element                               |
| VSAL_I1742              |                     | hypothetical protein           | Contains a nonsense mutation                                         |
| VSAL_I1771              |                     | hypothetical protein           | Contains a frameshift                                                |
| VSAL_I1832              |                     | hypothetical protein           | Truncated by the downstream IS element                               |
| VSAL_I1992              | Part of VSAL_I1277  | hypothetical protein           | Truncated by the downstream IS element                               |
| VSAL_I2021              |                     | conserved hypothetical protein | Contains a frameshift                                                |
| VSAL_I2052              |                     | hypothetical protein           | Contains a frameshift                                                |
| VSAL_I2561              |                     | conserved hypothetical protein | Contains a frameshift                                                |
| VSAL_I2698              |                     | hypothetical protein           | Contains a frameshift                                                |
| VSAL_I2957              |                     | hypothetical protein           | Truncated by the upstream IS element                                 |
| VSAL_I10004             |                     | hypothetical protein           | Contains a nonsense mutation                                         |
| VSAL_I10072             |                     | hypothetical protein           | Truncated by the upstream IS element and truncated at the C-terminus |
| VSAL_I10105             | Part of VSAL_I10209 | hypothetical protein           | Truncated by the downstream IS element                               |
| VSAL_I10187             |                     | hypothetical protein           | Truncated by the upstream IS element                                 |
| VSAL_I10207             |                     | hypothetical protein           | Extended by the downstream IS element                                |
| VSAL_I10209             | Part of VSAL_I10105 | hypothetical protein           | Truncated by the upstream IS element                                 |

|             |                                |                                                                                   |
|-------------|--------------------------------|-----------------------------------------------------------------------------------|
| VSAL_I10358 | hypothetical protein           | Disrupted by an IS element                                                        |
| VSAL_I10430 | hypothetical protein           | Contains a nonsense mutation                                                      |
| VSAL_I10647 | hypothetical protein           | Contains a frameshift                                                             |
| VSAL_I10746 | conserved hypothetical protein | Disrupted by an IS element                                                        |
| VSAL_I10874 | hypothetical protein           | Truncated by the upstream IS element                                              |
| VSAL_I10924 | hypothetical protein           | Contains a nonsense mutation, a frameshift and truncated by downstream IS element |
| VSAL_I11000 | hypothetical protein           | Contains a nonsense mutation                                                      |
| VSAL_I11015 | hypothetical protein           | Extended by the downstream IS element                                             |
| VSAL_I11058 | hypothetical protein           | Truncated by the upstream IS element                                              |
| VSAL_I11085 | hypothetical protein           | Truncated by the upstream IS element                                              |
| VSAL_I11089 | hypothetical protein           | Truncated by the downstream IS element                                            |
| VSAL_I11100 | hypothetical protein           | Contains a nonsense mutation                                                      |

|                                                                       |
|-----------------------------------------------------------------------|
| 51 genes<br>30 affected by IS elements<br>21 mutations or truncations |
|-----------------------------------------------------------------------|

**Chemotaxis and mobility**

|             |                                              |                                                            |
|-------------|----------------------------------------------|------------------------------------------------------------|
| VSAL_I1444  | methyl-accepting chemotaxis protein          | Contains a frameshift and is disrupted by an IS element    |
| VSAL_I1462  | methyl-accepting chemotaxis protein          | Contains a frameshift and is disrupted by an IS element    |
| VSAL_I1707  | putative methyl-accepting chemotaxis protein | Disrupted by an IS element and truncated at the C-terminus |
| VSAL_I1812  | putative methyl-accepting chemotaxis protein | Truncated by the downstream IS element                     |
| VSAL_I1822  | methyl-accepting chemotaxis protein          | Truncated by the upstream IS element                       |
| VSAL_I2117  | methyl-accepting chemotaxis protein          | Extended by the downstream IS element                      |
| VSAL_I2308  | polar flagellar M-ring protein FlIF          | Contains a nonsense mutation                               |
| VSAL_I2316  | polar flagellar protein FlaG                 | Contains a nonsense mutation                               |
| VSAL_I2601  | methyl-accepting chemotaxis protein          | Contains a frameshift                                      |
| VSAL_I3036  | methyl-accepting chemotaxis protein          | Truncated by the downstream IS element                     |
| VSAL_I10282 | methyl-accepting chemotaxis protein          | Contains a nonsense mutation                               |
| VSAL_I10443 | methyl-accepting chemotaxis protein          | Contains a frameshift                                      |
| VSAL_I10769 | methyl-accepting chemotaxis protein          | Truncated by the downstream IS element                     |

|                                                                     |
|---------------------------------------------------------------------|
| 13 genes<br>8 affected by IS elements<br>5 mutations or truncations |
|---------------------------------------------------------------------|

**Transport/binding proteins**

|            |                                                |                                       |
|------------|------------------------------------------------|---------------------------------------|
| VSAL_I0071 | Trk system potassium uptake protein            | Extended by the downstream IS element |
| VSAL_I0094 | ABC transporter, ATP-binding protein           | Contains a frameshift                 |
| VSAL_I0202 | membrane permease                              | Contains a frameshift                 |
| VSAL_I0657 | ABC transporter protein, ATP-binding component | Contains a frameshift                 |
| VSAL_I0743 | inner membrane transport protein               | Disrupted by an IS element            |
| VSAL_I0867 | oligopeptide transport ATP-binding protein     | Contains a nonsense mutation          |
| VSAL_I0894 | sodium/solute symporter                        | Truncated by the upstream IS element  |
| VSAL_I1148 | sodium/dicarboxylate symporter                 | Contains a frameshift                 |

|             |                      |                                                                      |                                                                  |
|-------------|----------------------|----------------------------------------------------------------------|------------------------------------------------------------------|
| VSAL_I1165  |                      | putative sodium/sulfate symporter                                    | Truncated by the downstream IS element                           |
| VSAL_I1261  |                      | PTS system E1IB, membrane component                                  | Contains frameshifts and a 200 amino acid deletion               |
| VSAL_I1338  |                      | tyrosine-specific transport protein                                  | Extended by the downstream IS element                            |
| VSAL_I1409  |                      | transporter, BCCT family                                             | Disrupted by an IS element                                       |
| VSAL_I1631  |                      | sodium/solute symporter                                              | Truncated by the downstream IS element                           |
| VSAL_I1657  |                      | PTS system, E1IC membrane component                                  | Contains a frameshift                                            |
| VSAL_I1751  |                      | TonB protein                                                         | Contains a frameshift                                            |
| VSAL_I1794  |                      | Na(+) driven multidrug efflux pump                                   | Truncated at the N-terminus                                      |
| VSAL_I1947  |                      | oligopeptide transport system permease protein B                     | Contains a nonsense mutation                                     |
| VSAL_I2008  | Part of VSAL_I2045   | putative long-chain fatty acid transport protein                     | Truncated by the downstream IS element                           |
| VSAL_I2013  |                      | ABC transporter, ATP binding protein                                 | Contains a frameshift                                            |
| VSAL_I2014  |                      | putative ABC transporter, ATP-binding protein                        | Truncated by the upstream IS element                             |
| VSAL_I2016  |                      | secretion protein, HlyD family                                       | Truncated by the upstream IS element                             |
| VSAL_I2045  | Part of VSAL_I2008   | putative long-chain fatty acid transport protein                     | Truncated by the downstream IS element                           |
| VSAL_I2069  |                      | putative ABC transporter, ATP-binding protein                        | Truncated by the downstream IS element                           |
| VSAL_I2160  |                      | Na+/H+ antiporter                                                    | Contains a frameshift and truncated by the downstream IS element |
| VSAL_I2352  |                      | chitoporin                                                           | Contains a frameshift                                            |
| VSAL_I2459  |                      | putative sodium/solute symporter                                     | Contains a frameshift and disrupted by an IS element             |
| VSAL_I2576  |                      | peptide ABC transporter, periplasmic peptide-binding protein         | Contains a frameshift and a 8 amino acid deletion                |
| VSAL_I2810  |                      | anaerobic C4-dicarboxylate transporter DcuA                          | Contains a frameshift                                            |
| VSAL_II0094 |                      | membrane transport protein, LysE type                                | Extended by the downstream IS element                            |
| VSAL_II0133 | Part of VSAL_II1051  | putative sodium/sulfate symporter                                    | Truncated by the downstream IS element                           |
| VSAL_II0157 |                      | ABC transporter, ATP-binding component                               | Disrupted by an IS element                                       |
| VSAL_II0199 |                      | putative potassium channel                                           | Contains a frameshift                                            |
| VSAL_II0233 |                      | maltose/maltodextrin transport ATP-binding protein                   | Truncated by the upstream IS element                             |
| VSAL_II0828 |                      | secretion protein, HlyD family                                       | Disrupted by an IS element                                       |
| VSAL_II0841 |                      | Na+/H+ antiporter NhaC                                               | Contains a frameshift and a 280 amino acid deletion              |
| VSAL_II0898 |                      | putative PTS system, IIC component                                   | Contains a frameshift                                            |
| VSAL_II0907 |                      | iron(III) ABC transporter, periplasmic iron-compound-binding protein | Contains a frameshift                                            |
| VSAL_II0919 | Part of VSAL_II0927  | maltose transport system permease protein MalF                       | Truncated by the upstream IS element                             |
| VSAL_II0927 | Part of VSAL_II0919  | maltose transport system permease protein MalF                       | Truncated by the upstream and downstream IS elements             |
| VSAL_II1051 | Part of VSAL_II10133 | putative sodium/sulfate symporter                                    | Truncated by the upstream IS element                             |
| VSAL_II1078 |                      | divalent cation transport protein                                    | Contains a nonsense mutation                                     |
| VSAL_II1087 |                      | MFS transporter                                                      | Truncated by the upstream IS element                             |

|                             |
|-----------------------------|
| 42 genes                    |
| 22 affected by IS elements  |
| 20 mutations or truncations |

#### Protection responses

|            |                                        |                             |
|------------|----------------------------------------|-----------------------------|
| VSAL_I1336 | multidrug efflux pump                  | Truncated at the C-terminus |
| VSAL_I1734 | heme receptor                          | Contains a frameshift       |
| VSAL_I1910 | penicillin-binding protein 2 (PBP-2)   | Disrupted by an IS element  |
| VSAL_I1964 | putative multidrug resistance protein  | Contains a frameshift       |
| VSAL_I2906 | integral membrane protein, MarC family | Contains a frameshift       |

VSAL\_I3052 multidrug efflux pump  
 VSAL\_I10016 putative plasmid-encoded multidrug efflux pump  
 VSAL\_I10029 transporter, acriflavin resistance protein  
 VSAL\_I10709 multidrug efflux pump  
 VSAL\_I10955 putative multidrug transport protein

Disrupted by an IS element  
 Truncated by the downstream IS element  
 Disrupted by an IS element  
 Contains a frameshift  
 Contains a frameshift

10 genes  
 4 affected by IS elements  
 6 mutations or truncations

#### Adaptation

VSAL\_I1317 carbon starvation protein

Contains a nonsense mutation

1 gene  
 1 mutation

#### Macromolecule degradation

VSAL\_I0763 Part of VSAL\_I0902 chitinase A  
 VSAL\_I0819 ATP-dependent Clp protease ATP-binding subunit ClpX  
 VSAL\_I0902 Part of VSAL\_I0763 chitinase A  
 VSAL\_I1108 chitodextrinase  
 VSAL\_I1238 exported serine protease  
 VSAL\_I1414 putative chitinase  
 VSAL\_I1429 putative peptidase  
 VSAL\_I1493 microbial collagenase precursor  
 VSAL\_I1546 aminopeptidase N  
 VSAL\_I1942 chitinase  
 VSAL\_I2164 peptidase family M16  
 VSAL\_I2483 putative type I restriction enzyme R protein  
 VSAL\_I10003 proline iminopeptidase

Truncated by the upstream IS element  
 Disrupted by an IS element  
 Truncated by the downstream IS element  
 Truncated by the downstream IS element and N-term truncation  
 Disrupted by an IS element  
 Disrupted by an IS element  
 Disrupted by an IS element  
 Contains a nonsense mutation  
 Contains a nonsense mutation  
 Disrupted by an IS element  
 Extended by the downstream IS element  
 Truncated by the downstream IS element  
 Contains a frameshift

13 genes  
 10 affected by IS elements  
 3 mutations or truncations

#### Macromolecule synthesis, modification

VSAL\_I0166 putative acylneuraminate cytidyltransferase  
 VSAL\_I0175 lipopolysaccharide biosynthesis protein WavS  
 VSAL\_I0178 putative dTDP-4-dehydrorhamnose reductase  
 VSAL\_I0213 tRNA (guanosine-2'-o-)-methyltransferase  
 VSAL\_I0245 putative dTDP-4-dehydrorhamnose reductase  
 VSAL\_I0248 lipopolysaccharide biosynthesis protein WavS  
 VSAL\_I0257 putative acylneuraminate cytidyltransferase  
 VSAL\_I0460 colanic biosynthesis UDP-glucose lipid carrier transferase

Contains a nonsense mutation  
 Contains a nonsense mutation  
 Contains two nonsense mutations  
 Truncated by the downstream IS element  
 Contains a nonsense mutation  
 Contains a nonsense mutation  
 Contains a nonsense mutation  
 Contains a frameshift

|             |                    |                                                            |                                                              |
|-------------|--------------------|------------------------------------------------------------|--------------------------------------------------------------|
| VSAL_I0565  |                    | peptide chain release factor 2 (RF-2)                      | Contains a frameshift                                        |
| VSAL_I0970  |                    | DNA polymerase IV                                          | Truncated at the N-terminus                                  |
| VSAL_I1275  | Part of VSAL_I1994 | helicase                                                   | Truncated by the downstream IS element                       |
| VSAL_I1479  |                    | putative acyltransferase                                   | Truncated by the upstream IS element                         |
| VSAL_I1679  |                    | type I restriction enzyme R protein                        | Contains a nonsense mutation                                 |
| VSAL_I1691  |                    | tRNA-(ms[2]io[6]A)-hydroxylase                             | Disrupted by an IS element                                   |
| VSAL_I1791  |                    | type I restriction-modification system specificity subunit | Contains a nonsense mutation                                 |
| VSAL_I1994  | Part of VSAL_I1275 | helicase                                                   | Truncated by the upstream IS element                         |
| VSAL_I2606  |                    | glutamyl-Q tRNA(Asp) synthetase                            | Contains a frameshift                                        |
| VSAL_I2852  |                    | NADH pyrophosphatase                                       | Disrupted by an IS element                                   |
| VSAL_I10040 |                    | 1,4-alpha-glucan branching enzyme                          | Extended by the downstream IS element                        |
| VSAL_I10412 |                    | putative DNA methylase                                     | Contains a nonsense mutation and truncated at the N-terminus |

|                                                                      |
|----------------------------------------------------------------------|
| 20 genes<br>7 affected by IS elements<br>13 mutations or truncations |
|----------------------------------------------------------------------|

#### Amino acid biosynthesis

|            |                    |                                                                       |                                        |
|------------|--------------------|-----------------------------------------------------------------------|----------------------------------------|
| VSAL_I0041 | Part of VSAL_I0055 | acetolactate synthase isozyme II large subunit                        | Truncated by the downstream IS element |
| VSAL_I0055 | Part of VSAL_I0041 | acetolactate synthase isozyme II large subunit                        | Truncated by the downstream IS element |
| VSAL_I0443 |                    | lysine-sensitive aspartokinase III                                    | Disrupted by an IS element             |
| VSAL_I0861 | Part of VSAL_I0916 | 5-methyltetrahydropteroyltriglutamate--homocysteine methyltransferase | Truncated by the downstream IS element |
| VSAL_I0916 | Part of VSAL_I0861 | 5-methyltetrahydropteroyltriglutamate--homocysteine methyltransferase | Truncated by the downstream IS element |

|                                      |
|--------------------------------------|
| 5 genes<br>5 affected by IS elements |
|--------------------------------------|

#### Biosynthesis of cofactors, carriers

|             |                    |                                         |                                        |
|-------------|--------------------|-----------------------------------------|----------------------------------------|
| VSAL_I0156  | Part of VSAL_I0237 | phosphopantetheine adenyltransferase    | Truncated by the upstream IS element   |
| VSAL_I0237  | Part of VSAL_I0156 | phosphopantetheine adenyltransferase    | Truncated by the downstream IS element |
| VSAL_I0513  |                    | isopentenyl-diphosphate delta-isomerase | Disrupted by an IS element             |
| VSAL_I10273 |                    | siderophore biosynthesis protein lucA   | Truncated by the upstream IS element   |
| VSAL_I10275 |                    | siderophore biosynthesis protein lucC   | Disrupted by an IS element             |

|                                      |
|--------------------------------------|
| 5 genes<br>5 affected by IS elements |
|--------------------------------------|

#### Central intermediary metabolism

|             |  |                                                          |                                                      |
|-------------|--|----------------------------------------------------------|------------------------------------------------------|
| VSAL_I0145  |  | guanosine-5'-triphosphate,3'-diphosphate pyrophosphatase | Contains a frameshift                                |
| VSAL_I0622  |  | purine nucleoside phosphorylase                          | Contains a nonsense mutation                         |
| VSAL_I1548  |  | NAD-dependent glutamate dehydrogenase                    | Contains a frameshift                                |
| VSAL_I10255 |  | agmatinase                                               | Contains a frameshift and disrupted by an IS element |
| VSAL_I10830 |  | putative aldo-keto reductase                             | Extended by the downstream IS element                |

### Degradation of small molecules

VSAL\_I0906 long-chain-fatty-acid-CoA ligase  
VSAL\_I1521 putative arginase

5 genes  
2 affected by IS elements  
3 mutations or truncations

Truncated by the downstream IS element  
Truncated by the downstream IS element

### Energy metabolism, carbon

VSAL\_I2366 periplasmic nitrate reductase precursor NapA  
VSAL\_I2624 dihydrolipoyllysine-residue acetyltransferase  
VSAL\_I10005 cytochrome b561 CybB  
VSAL\_I10108 Part of VSAL\_I10193 biotin sulfoxide reductase  
VSAL\_I10109 cytochrome C-type protein  
VSAL\_I10162 cytochrome o ubiquinol oxidase subunit I  
VSAL\_I10193 Part of VSAL\_I10108 biotin sulfoxide reductase  
VSAL\_I10514 major NAD(P)H-flavin oxidoreductase

2 genes  
2 affected by IS elements

Contains a frameshift  
Truncated at the N-terminus  
Truncated by the upstream IS element  
Truncated by the downstream IS element  
Contains a frameshift  
Contains a frameshift  
Truncated by the upstream IS element  
Disrupted by an IS element

### Fatty acid and phosphatidic acid biosynthesis

VSAL\_I2089 3-oxoacyl-[acyl-carrier-protein] synthase 2  
VSAL\_I10872 cyclopropane-fatty-acyl-phospholipid synthase

8 genes  
4 affected by IS elements  
4 mutations or truncations

Extended by the downstream IS element  
Contains a frameshift

### Membrane/exported/lipoproteins

VSAL\_I0036 toxin coregulated pilus biosynthesis protein I  
VSAL\_I0037 putative exported protein  
VSAL\_I0455 putative chain length determinant protein  
VSAL\_I0472 type IV pilus, mannose-sensitive hemagglutinin E  
VSAL\_I0943 outer membrane protein OmpK  
VSAL\_I0971 alanine racemase  
VSAL\_I1104 part of VSAL\_I1002 membrane protein  
VSAL\_I1002 part of VSAL\_I1104 membrane protein  
VSAL\_I1113 putative type VI secretion protein VasK  
VSAL\_I1130 putative outer membrane protein  
VSAL\_I1183 putative type VI secretion protein VasK-1

2 genes  
1 affected by IS elements  
1 mutations or truncations

Truncated by the upstream IS element  
Truncated by the downstream IS element  
Disrupted by an IS element  
Contains a nonsense mutation  
Contains a nonsense mutation  
Disrupted by an IS element  
Truncated by the downstream IS element  
Truncated by the downstream IS element  
Contains a nonsense mutation  
Contains a nonsense mutation  
Disrupted by an IS element

|             |                    |                                                               |                                                       |
|-------------|--------------------|---------------------------------------------------------------|-------------------------------------------------------|
| VSAL_I1208  |                    | putative exported protein                                     | Extended by the downstream IS element                 |
| VSAL_I1265  |                    | putative exported protein                                     | Truncated by the downstream IS element                |
| VSAL_I1290  |                    | outer membrane protein, OmpA family                           | Disrupted by an IS element                            |
| VSAL_I1480  |                    | putative membrane protein                                     | Truncated at the N-terminus                           |
| VSAL_I1523  | Part of VSAL_I1602 | putative membrane protein                                     | Truncated by the upstream IS element                  |
| VSAL_I1525  |                    | putative lipoprotein                                          | Contains a frameshift and truncated at the N-terminus |
| VSAL_I1602  | Part of VSAL_I1523 | putative membrane protein                                     | Truncated by the downstream IS element                |
| VSAL_I1604  |                    | putative exported protein                                     | Truncated by the downstream IS element                |
| VSAL_I1702  |                    | putative lipoprotein                                          | Extended by the downstream IS element                 |
| VSAL_I1722  |                    | membrane associated GGDEF protein                             | Disrupted by an IS element                            |
| VSAL_I1735  |                    | membrane protein                                              | Truncated at the C-terminus                           |
| VSAL_I1738  |                    | putative membrane protein                                     | Truncated by the downstream IS element                |
| VSAL_I1744  |                    | VgrG protein, VgrG-1                                          | Disrupted by an IS element                            |
| VSAL_I1923  |                    | putative outer membrane protein OmpA                          | Contains a frameshift                                 |
| VSAL_I2012  |                    | putative membrane protein                                     | Truncated by the downstream IS element                |
| VSAL_I2177  |                    | putative exported protein                                     | Disrupted by an IS element                            |
| VSAL_I2403  |                    | putative membrane protein                                     | Disrupted by an IS element                            |
| VSAL_I2447  |                    | putative exported protein                                     | Extended by the downstream IS element                 |
| VSAL_I2468  |                    | putative lipoprotein                                          | Disrupted by an IS element                            |
| VSAL_I2596  |                    | putative exported protein                                     | Extended by the downstream IS element                 |
| VSAL_I2631  |                    | type IV pilus assembly protein PilC                           | Contains a frameshift                                 |
| VSAL_I2720  |                    | fimbrial assembly protein PilQ precursor                      | Disrupted by an IS element                            |
| VSAL_I2855  |                    | curli production assembly/transport component, CsgG precursor | Contains a frameshift                                 |
| VSAL_I2859  |                    | minor curlin subunit, CsgB like                               | Disrupted by an IS element                            |
| VSAL_I3022  |                    | putative membrane protein                                     | Truncated by the downstream IS element                |
| VSAL_II0049 |                    | putative membrane protein                                     | Truncated by the upstream IS element                  |
| VSAL_II0336 |                    | membrane protein                                              | Extended by the downstream IS element                 |
| VSAL_II0379 |                    | outer membrane protein, OmpA family                           | Contains a nonsense mutation                          |
| VSAL_II0388 |                    | putative secreted hydrolase                                   | Disrupted by an IS element                            |
| VSAL_II0466 |                    | putative membrane protein                                     | Truncated by the downstream IS element                |
| VSAL_II0494 |                    | putative membrane protein                                     | Truncated by the downstream IS element                |
| VSAL_II0617 |                    | outer membrane efflux protein                                 | Contains a frameshift                                 |
| VSAL_II0679 |                    | putative membrane protein                                     | Contains a nonsense mutation                          |
| VSAL_II0877 |                    | membrane protein                                              | Truncated by the downstream IS element                |
| VSAL_II0931 |                    | membrane protein                                              | Truncated by the downstream IS element                |
| VSAL_II0972 |                    | putative membrane protein                                     | Truncated by the downstream IS element                |
| VSAL_II0804 |                    | putative lipoprotein                                          | Extended by the downstream IS element                 |
| VSAL_II0899 |                    | putative exported protein                                     | Disrupted by an IS element                            |
| VSAL_II0989 |                    | putative exported protein                                     | Truncated by the downstream IS element                |
| VSAL_II1008 |                    | putative type IV pilus biogenesis protein                     | Truncated by the upstream IS element                  |
| VSAL_II1096 |                    | membrane protein                                              | Truncated by the upstream IS element                  |

|                             |
|-----------------------------|
| 51 genes                    |
| 40 affected by IS elements  |
| 13 mutations or truncations |

## Transposon-related functions

|            |             |                                                                      |
|------------|-------------|----------------------------------------------------------------------|
| VSAL_I0013 | transposase | Disrupted by an IS element                                           |
| VSAL_I0068 | transposase | Contains a frameshift                                                |
| VSAL_I0130 | transposase | Truncated by the downstream IS element                               |
| VSAL_I0153 | transposase | Contains a frameshift                                                |
| VSAL_I0154 | transposase | Contains a frameshift                                                |
| VSAL_I0281 | transposase | Contains a frameshift                                                |
| VSAL_I0314 | transposase | Disrupted by an IS element                                           |
| VSAL_I0318 | transposase | Contains a frameshift                                                |
| VSAL_I0357 | transposase | Contains a frameshift                                                |
| VSAL_I0438 | transposase | Truncated by the upstream IS element                                 |
| VSAL_I0514 | transposase | Contains several frameshifts                                         |
| VSAL_I0764 | transposase | Contains several frameshifts                                         |
| VSAL_I0765 | transposase | Contains a nonsense mutation                                         |
| VSAL_I0808 | transposase | Disrupted by an IS element                                           |
| VSAL_I0897 | transposase | Contains a frameshift                                                |
| VSAL_I0905 | transposase | Contains two nonsense mutations                                      |
| VSAL_I1000 | transposase | Disrupted by an IS element                                           |
| VSAL_I1063 | transposase | Contains a frameshift and a possible truncation                      |
| VSAL_I1106 | transposase | Contains a frameshift                                                |
| VSAL_I1107 | transposase | Contains a frameshift                                                |
| VSAL_I1241 | transposase | Contains a frameshift                                                |
| VSAL_I1258 | transposase | Contains a frameshift                                                |
| VSAL_I1267 | transposase | Contains a frameshift                                                |
| VSAL_I1268 | transposase | Contains a frameshift                                                |
| VSAL_I1315 | transposase | Contains a frameshift                                                |
| VSAL_I1316 | transposase | Contains a frameshift                                                |
| VSAL_I1361 | transposase | Contains a frameshift                                                |
| VSAL_I1440 | transposase | Disrupted by an IS element                                           |
| VSAL_I1653 | transposase | Truncated by the insertion of the upstream and downstream IS element |
| VSAL_I1716 | transposase | Contains a frameshift                                                |
| VSAL_I1778 | transposase | Contains a nonsense mutation                                         |
| VSAL_I1811 | transposase | Contains a frameshift                                                |
| VSAL_I1821 | transposase | Truncated at the N-terminus                                          |
| VSAL_I1833 | transposase | Contains several frameshifts                                         |
| VSAL_I1835 | transposase | Contains a frameshift                                                |
| VSAL_I1945 | transposase | Contains a nonsense mutation                                         |
| VSAL_I2009 | transposase | Contains a frameshift                                                |
| VSAL_I2086 | transposase | Contains two nonsense mutations                                      |
| VSAL_I2265 | transposase | Contains a frameshift                                                |
| VSAL_I2320 | transposase | Contains a frameshift                                                |
| VSAL_I2321 | transposase | Truncated by the insertion of the upstream IS element                |
| VSAL_I2322 | transposase | Disrupted by the insertion of an IS element                          |
| VSAL_I2462 | transposase | Contains a frameshift                                                |

|             |             |                                                       |
|-------------|-------------|-------------------------------------------------------|
| VSAL_I2487  | transposase | Contains a frameshift                                 |
| VSAL_I2612  | transposase | Contains a frameshift                                 |
| VSAL_I2620  | transposase | Contains a frameshift                                 |
| VSAL_I2621  | transposase | Contains a frameshift                                 |
| VSAL_I2809  | transposase | Contains a frameshift                                 |
| VSAL_I2862  | transposase | Truncated by the insertion of the upstream IS element |
| VSAL_I2933  | transposase | Contains a frameshift                                 |
| VSAL_I2958  | transposase | Contains a frameshift                                 |
| VSAL_I3007  | transposase | Contains a frameshift                                 |
| VSAL_I3017  | transposase | Contains a frameshift                                 |
| VSAL_I3023  | transposase | Contains a frameshift                                 |
| VSAL_I3034  | transposase | Truncated by the upstream IS element                  |
| VSAL_I3037  | transposase | Contains a frameshift and two nonsense mutations      |
| VSAL_I3042  | transposase | Contains a frameshift                                 |
| VSAL_I3053  | transposase | Contains a frameshift                                 |
| VSAL_I10007 | transposase | Disrupted by an IS element                            |
| VSAL_I10009 | transposase | Contains a nonsense mutation                          |
| VSAL_I10022 | transposase | Truncated by the insertion of a downstream IS element |
| VSAL_I10025 | transposase | Contains a frameshift                                 |
| VSAL_I10030 | transposase | Disrupted by an IS element                            |
| VSAL_I10044 | transposase | Truncated by the downstream IS element                |
| VSAL_I10045 | transposase | Truncated by the downstream IS element                |
| VSAL_I10071 | transposase | Contains a frameshift                                 |
| VSAL_I10082 | transposase | Contains a nonsense mutation                          |
| VSAL_I10129 | transposase | Disrupted by an IS element                            |
| VSAL_I10189 | transposase | Truncated by the downstream IS element                |
| VSAL_I10227 | transposase | Contains a nonsense mutation                          |
| VSAL_I10257 | transposase | Contains a frameshift                                 |
| VSAL_I10272 | transposase | Contains a frameshift                                 |
| VSAL_I10535 | transposase | Contains a nonsense mutation                          |
| VSAL_I10563 | transposase | Truncated by the upstream IS element                  |
| VSAL_I10698 | transposase | Contains a frameshift                                 |
| VSAL_I10700 | transposase | Contains a frameshift                                 |
| VSAL_I10768 | transposase | Contains a nonsense mutation                          |
| VSAL_I10831 | transposase | Contains a frameshift                                 |
| VSAL_I10976 | transposase | Truncated by the upstream IS element                  |
| VSAL_I10992 | transposase | Disrupted by an IS element                            |
| VSAL_I11005 | transposase | Contains a frameshift                                 |
| VSAL_I11049 | transposase | Contains a frameshift                                 |
| VSAL_I11092 | transposase | Contains a frameshift                                 |

|                             |
|-----------------------------|
| 83 genes                    |
| 22 affected by IS elements  |
| 61 mutations or truncations |

**Phage-related functions and prophages**

|             |  |                                                |                                                          |
|-------------|--|------------------------------------------------|----------------------------------------------------------|
| VSAL_I0395  |  | hypothetical protein                           | Truncated by the downstream IS element                   |
| VSAL_I0767  |  | hypothetical protein, putative phage integrase | Truncated by the downstream IS element                   |
| VSAL_I0774  |  | putative portal vertex protein                 | Contains a frameshift                                    |
| VSAL_I0776  |  | hypothetical protein                           | Truncated at the N-terminus                              |
| VSAL_I1033  |  | hypothetical protein, putative phage gene      | Contains a frameshift                                    |
| VSAL_I1926  |  | immunoglobulin-binding regulator               | Contains a frameshift and a 24 amino acid deletion       |
| VSAL_I1927  |  | hypothetical protein                           | Truncated by the upstream IS element                     |
| VSAL_I2122  |  | putative capsid portal protein                 | Truncated at the N-terminus                              |
| VSAL_I2123  |  | putative bacteriocin immunity protein          | Truncated at the N-terminus                              |
| VSAL_I2263  |  | hypothetical protein, putative phage integrase | Truncated by the upstream and downstream IS elements     |
| VSAL_I10410 |  | hypothetical protein, putative phage gene      | Truncated at the N-terminus                              |
| VSAL_I10502 |  | putative bacteriophage integrase               | Truncated at the C-terminus                              |
| VSAL_I10629 |  | hypothetical protein                           | Truncated by the insertion of the upstream bacteriophage |
| VSAL_I10632 |  | hypothetical protein, putative phage integrase | Truncated at the N-terminus                              |
| VSAL_I10635 |  | hypothetical protein, putative phage integrase | Truncated at the N-terminus                              |

|                                                                      |
|----------------------------------------------------------------------|
| 15 genes<br>4 affected by IS elements<br>11 mutations or truncations |
|----------------------------------------------------------------------|

#### Pathogenicity island-related functions

|             |                    |                                               |                                                      |
|-------------|--------------------|-----------------------------------------------|------------------------------------------------------|
| VSAL_I0067  |                    | putative hemolysin/hemagglutinin-like protein | Truncated by the upstream and downstream IS elements |
| VSAL_I0863  | Part of VSAL_I0918 | accessory colonization factor AcfD precursor  | Truncated by the downstream IS element               |
| VSAL_I0918  | Part of VSAL_I0863 | accessory colonization factor AcfD precursor  | Truncated by the upstream IS element                 |
| VSAL_I10528 |                    | hemolysin secretion protein                   | Contains a frameshift                                |

|                                                    |
|----------------------------------------------------|
| 4 genes<br>3 affected by IS elements<br>1 mutation |
|----------------------------------------------------|

#### Regulation

|             |  |                                                     |                              |
|-------------|--|-----------------------------------------------------|------------------------------|
| VSAL_I0378  |  | transcriptional regulator, AcrR/TetR family         | Contains a nonsense mutation |
| VSAL_I0673  |  | HTH-type transcriptional regulator, LysR family     | Contains a nonsense mutation |
| VSAL_I0813  |  | transcriptional regulator ToxR protein              | Contains a frameshift        |
| VSAL_I1118  |  | transcriptional regulatory protein, Fis family Vash | Contains a frameshift        |
| VSAL_I1402  |  | putative sigma-54 dependent response regulator      | Contains a frameshift        |
| VSAL_I1434  |  | HTH-type transcriptional regulator, LysR family     | Contains a nonsense mutation |
| VSAL_I2185  |  | histidine kinase                                    | Contains a nonsense mutation |
| VSAL_I2256  |  | putative regulatory protein, AraC family            | Contains a frameshift        |
| VSAL_I10186 |  | HTH-type transcriptional regulator, LysR family     | Contains a nonsense mutation |
| VSAL_I10195 |  | putative response regulator                         | Contains a frameshift        |
| VSAL_I10612 |  | HTH-type transcriptional regulator, LysR family     | Contains a frameshift        |
| VSAL_I10642 |  | putative membrane associated signal transducer      | Disrupted by an IS element   |
| VSAL_I10724 |  | membrane associated histidine kinase                | Contains a frameshift        |

VSAL\_II0943 autoinducer 1 sensor kinase/phosphatase LuxN  
 VSAL\_II0945 HTH-type transcriptional regulator, GntR-family  
 VSAL\_II1004 HTH-type transcriptional regulator, Lacl family  
 VSAL\_II1039 HTH-type transcriptional regulator, LysR family  
 VSAL\_II1047 putative transcriptional regulator, LysR family  
 VSAL\_II1069 HTH-type transcriptional regulator, LysR family

Contains a frameshift  
 Contains a frameshift  
 Truncated by the downstream IS element  
 Contains a nonsense mutation  
 Truncated by the upstream IS element  
 Contains a frameshift

19 genes  
 3 affected by IS elements  
 16 mutations or truncations

**Others**

VSAL\_I0929 autoinducer 2-binding periplasmic protein LuxP precursor

Contains a frameshift

1 gene  
 1 mutations or truncations

**Not classified (included putative assignments)**

VSAL\_I1360 hypothetical protein, putative cell wall degradation protein  
 VSAL\_I1461 putative signaling protein  
 VSAL\_I1629 glycosyl transferase, family 2  
 VSAL\_I1710 putative hemolysin  
 VSAL\_I1818 phosphoesterase  
 VSAL\_I2036 putative genetic competence protein  
 VSAL\_I2950 putative signaling protein  
 VSAL\_II0244 molybdopterin oxidoreductase  
 VSAL\_II0332 putative hemolysin-type calcium-binding protein  
 VSAL\_II0347 putative arylsulfatase-activating protein  
 VSAL\_II0453 putative HTH-type transcriptional regulator  
 VSAL\_II0655 putative phosphate-binding protein  
 VSAL\_II0761 putative signaling protein  
 VSAL\_II0801 putative RHS protein  
 VSAL\_II0971 putative cytotoxic necrotizing factor 1  
 VSAL\_II1063 putative HTH-type transcriptional regulator

Extended by the downstream IS element  
 Contains a nonsense mutation and truncated at C-terminus  
 Contains a frameshift  
 Contains frameshift and nonsense mutation  
 Contains a frameshift  
 Truncated by the downstream IS element  
 Disrupted by an IS element  
 Contains a frameshift and truncated by the downstream IS element  
 Truncated by the downstream IS element  
 Contains a frameshift  
 Disrupted by an IS element  
 Contains a frameshift  
 Truncated by the upstream IS element  
 Truncated by the upstream IS element  
 Truncated by the upstream IS element  
 Truncated by the upstream IS element

16 genes  
 10 affected by IS elements  
 6 mutations or truncations

**Total in the chromosomal DNA** **367 genes**  
**181 affected by IS elements**  
**186 mutations or truncations**

## Plasmids

|              |                           |                                                |
|--------------|---------------------------|------------------------------------------------|
| VSAL_p320_17 | putative exported protein | Truncated by the downstream IS element         |
| VSAL_p320_25 | putative MobA protein     | Truncated by the down- and upstream IS element |
| VSAL_p320_32 | transposase               | Contains a nonsense mutation                   |

|                            |                                                                                                                                                    |
|----------------------------|----------------------------------------------------------------------------------------------------------------------------------------------------|
| <b>Total in the genome</b> | <b>370 genes</b><br><b>183 disrupted (55) or truncated (115) or extended (13) by IS elements</b><br><b>187 mutations (164) or truncations (23)</b> |
|----------------------------|----------------------------------------------------------------------------------------------------------------------------------------------------|

\*Gene ID of the appurtenant part of CDS. Not merged due to distant localisation on the chromosome.
